# Supplementary material for: Computational Investigation of Conformational Properties of Short Azapeptides: Insights from DFT Study and NBO Analysis
Source: MDPI journal article supplement (doi:10.3390/molecules28145454), 2023-07-17
Supplement: s1 [file s1]

# Supporting Information:

## Computational Investigation of Conformational Properties of Short Azapeptides: Insights from DFT Study and NBO Analysis

**Table S1.** Dihedral angle values (in degrees) of all the optimized structures of Ac-azaAsn-Pro-NHMe (**1 ANP**) at the B3LYP/6-311++G(d,p) level of theory in the gas phase.

|           | $\omega_0$ | $\varphi_1$ | $\psi_1$ | $\omega_1$ | $\varphi_2$ | $\psi_2$ | $\omega_2$ | $\chi_1$ | $\chi_2$ | $\chi_3$ | $\chi_4$ | $\chi_1'$ | $\chi_2'$ | Conformer                    |
|-----------|------------|-------------|----------|------------|-------------|----------|------------|----------|----------|----------|----------|-----------|-----------|------------------------------|
| tttANP-1  | -171.3     | -62.5       | -29.4    | 177.8      | -103.2      | 17.2     | 174.4      | 33.8     | -35.6    | 23.7     | -2.3     | 64.9      | 167.7     | $\alpha_R\delta_R(g^+)$      |
| tctANP-2  | -171.5     | -126.1      | 27.7     | 23.3       | -102.5      | -13.7    | 178.6      | 31.3     | -38.5    | 30.6     | -11.3    | 69.8      | 158.7     | $\delta_R\delta_R(g^+)$      |
| tttANP-3  | -170.9     | -77.2       | -33.7    | -176.2     | -90.0       | 74.2     | -173.3     | 28.8     | -35.8    | 28.5     | -10.7    | 65.5      | 171.5     | $\delta_R\gamma'(g^+)$       |
| tttANP-4  | -173.3     | -63.4       | -26.9    | 177.7      | -102.3      | 16.0     | 174.5      | 34.2     | -35.7    | 23.5     | -1.8     | 122.0     | 78.8      | $\alpha_R\delta_R(s^+)$      |
| ttANP-5   | 173.2      | 118.5       | -29.2    | -173.5     | -90.2       | 78.1     | -177.0     | 28.8     | -35.7    | 28.5     | -10.7    | 115.8     | -19.3     | $\delta_L\gamma'(s^+)$       |
| cttANP-6  | 11.8       | -124.3      | 28.5     | -175.4     | -84.0       | 73.2     | -177.9     | 34.3     | -39.2    | 28.3     | -7.0     | 71.7      | 161.7     | $\delta_R\gamma'(g^+)$       |
| tctANP-7  | -166.1     | 102.1       | -169.5   | 30.1       | -119.1      | -0.6     | 177.5      | 37.2     | -38.3    | 24.7     | -1.2     | 85.7      | 4.5       | $\varepsilon\delta_R(g^+)$   |
| tttANP-8  | -171.0     | -61.6       | -32.6    | 179.5      | -101.6      | 18.4     | 174.1      | 33.9     | -36.1    | 24.4     | -3.0     | 72.3      | 26.4      | $\alpha_R\delta_R(g^+)$      |
| tttANP-9  | 168.9      | -140.4      | 176.8    | 178.1      | -108.1      | 24.8     | 173.9      | 35.0     | -34.1    | 20.2     | 2.0      | 70.2      | -131.9    | $\beta_S\delta_R(g^+)$       |
| cttANP-10 | 9.5        | -128.0      | 38.9     | -173.2     | -82.1       | 69.9     | -178.9     | 35.9     | -39.5    | 27.2     | -4.7     | 63.7      | 50.6      | $\delta_R\gamma'(g^+)$       |
| cttANP-11 | -10.5      | 119.9       | -16.0    | -173.2     | -88.1       | 74.5     | -177.3     | 31.8     | -37.8    | 28.6     | -8.9     | 114.9     | 74.2      | $\delta_L\gamma'(s^+)$       |
| tttANP-12 | -179.0     | 131.0       | -43.7    | 146.7      | -68.1       | 162.2    | -178.5     | 25.3     | -35.8    | 32.2     | -17.2    | 116.2     | -21.4     | $\delta_L\beta_P(s^+)$       |
| tctANP-13 | 175.3      | 124.9       | -82.5    | -7.8       | -68.8       | 136.4    | 179.3      | 31.0     | -36.5    | 27.3     | -8.0     | 74.9      | 20.8      | $?\beta_P(g^+)$              |
| tctANP-14 | 169.6      | 133.0       | -77.4    | -10.8      | -60.8       | 141.1    | -179.6     | 20.1     | -36.2    | 28.8     | -11.0    | 168.1     | -10.8     | $?\beta_P(t)$                |
| tttANP-15 | 173.5      | -81.0       | 160.4    | 170.6      | -82.3       | 156.1    | 179.9      | 25.6     | -35.7    | 31.7     | -16.3    | 67.1      | 102.1     | $\beta_P\beta_P(g^+)$        |
| cctANP-16 | 4.7        | -88.8       | -7.2     | -20.0      | -52.0       | 166.2    | 179.5      | 30.9     | -37.5    | 29.6     | -10.6    | 74.2      | 17.4      | $\delta_R\varepsilon''(g^+)$ |
| cctANP-17 | 15.7       | -121.9      | 10.4     | 3.4        | -88.4       | 15.0     | 177.4      | 36.1     | -38.7    | 26.1     | -3.4     | 76.7      | 174.0     | $\delta_R\delta_R(g^+)$      |
| ctANP-18  | 7.0        | -96.9       | -9.8     | 176.7      | -115.1      | 6.0      | 177.5      | 35.2     | -36.7    | 24.3     | -2.1     | 67.0      | 179.4     | $\delta_R\delta_R(g^+)$      |
| tcANP-19  | -175.0     | -72.3       | -37.2    | -24.8      | -39.5       | -60.9    | 177.3      | 21.1     | -32.6    | 31.3     | -19.2    | 73.2      | 16.2      | $\alpha_R?(g^+)$             |
| ctANP-20  | -16.8      | -106.7      | 170.6    | -179.1     | 107.6       | 17.5     | 175.0      | 36.1     | -35.3    | 20.9     | 2.1      | 71.7      | -90.7     | $\varepsilon''\delta_L(g^+)$ |
| ccANP-21  | 11.6       | -79.8       | -25.9    | -33.7      | -72.8       | 78.7     | -177.7     | 36.0     | -26.6    | 6.6      | 17.0     | 68.2      | -170.7    | $\delta_R\beta(g^+)$         |
| ccANP-22  | 21.1       | -137.3      | 41.6     | 32.1       | -107.6      | -13.6    | 174.8      | 33.0     | -39.3    | 30.3     | -9.9     | 60.5      | 49.5      | $?\delta_R(g^+)$             |
| cttANP-23 | 4.7        | -86.7       | -18.9    | -178.1     | -110.3      | 5.8      | 177.5      | 34.4     | -37.2    | 25.8     | -4.2     | 111.3     | 79.7      | $\delta_R\delta_R(s^+)$      |
| tctANP-24 | -169.7     | -73.8       | -37.1    | -26.8      | -51.8       | 144.7    | -178.3     | 31.4     | -36.5    | 27.4     | -7.9     | 65.6      | 165.6     | $\alpha_R\beta_P(g^+)$       |
| tctANP-25 | 173.3      | 145.4       | -64.4    | -6.3       | -85.6       | 34.5     | 174.9      | 37.7     | -36.9    | 21.4     | 2.7      | 164.4     | 158.9     | $?\delta_R(t)$               |
| cttANP-26 | 3.9        | -79.2       | -26.7    | -175.9     | -108.6      | 7.3      | 176.1      | 34.5     | -37.6    | 26.2     | -4.6     | 71.6      | 27.6      | $\delta_R\delta_R(g^+)$      |
| tttANP-27 | 173.0      | 136.2       | -52.3    | -172.3     | -89.4       | 75.9     | -176.9     | 27.8     | -35.2    | 28.5     | -11.4    | 158.7     | 154.4     | $?\gamma'(t)$                |
| ttcANP-28 | -175.5     | -73.7       | -28.9    | 179.1      | -118.8      | 76.5     | -7.2       | 35.7     | -30.7    | 14.0     | 8.8      | 122.9     | 78.2      | $\delta_R\zeta(s^+)$         |
| tecANP-29 | -168.5     | -123.2      | 26.1     | 22.0       | -97.5       | -20.1    | 7.6        | 31.1     | -37.8    | 29.7     | -10.5    | 74.1      | 95.5      | $\delta_R\delta_R(g^+)$      |
| tttANP-30 | -178.4     | 148.2       | -52.3    | 150.4      | -66.5       | 161.7    | -178.7     | 27.0     | -36.0    | 30.8     | -14.5    | 164.1     | 154.0     | $?\beta_P(t)$                |
| cctANP-31 | -19.2      | -112.1      | 163.8    | -21.9      | -73.8       | -5.5     | -178.1     | 34.1     | -36.5    | 24.3     | -2.7     | 69.9      | -75.0     | $\varepsilon''\delta_R(g^+)$ |
| cccANP-32 | -1.6       | 138.0       | -38.2    | -22.7      | -53.0       | 168.8    | -7.1       | 32.2     | -36.9    | 27.2     | -7.1     | 134.2     | -0.4      | $\delta_L\varepsilon''(s^+)$ |
| cccANP-33 | -21.6      | 142.0       | -45.7    | -10.1      | -71.2       | -19.1    | 11.4       | 32.3     | -36.9    | 26.8     | -6.6     | 152.4     | 143.1     | $\delta_L\delta_R(t)$        |

**Table S2.** Dihedral angle values (in degrees) of all the optimized structures of Ac-azaAsp-Pro-NHMe (**2**, **ADP**) at the B3LYP/6-311++G(d,p) level of theory in the gas phase.

|           | $\omega_0$ | $\phi_1$ | $\psi_1$ | $\omega_1$ | $\phi_2$ | $\psi_2$ | $\omega_2$ | $\chi_1$ | $\chi_2$ | $\chi_3$ | $\chi_4$ | $\chi_1'$ | $\chi_2'$ | Conformer                   |
|-----------|------------|----------|----------|------------|----------|----------|------------|----------|----------|----------|----------|-----------|-----------|-----------------------------|
| tttADP-1  | -173.3     | -61.6    | -30.6    | 178.2      | -103.4   | 18.3     | 174.2      | 33.9     | -35.7    | 23.7     | -2.3     | 63.8      | 177.1     | $\alpha_R\delta_R(g^+)(BI)$ |
| tttADP-2  | -172.3     | -75.9    | -35.0    | -176.4     | -90.0    | 75.0     | -173.3     | 28.9     | -35.7    | 28.3     | -10.4    | 65.1      | 177.6     | $\alpha_R\gamma'(g^+)$      |
| tctADP-3  | -172.5     | -125.1   | 25.7     | 24.6       | -102.8   | -14.1    | -180.0     | 31.0     | -38.4    | 30.8     | -11.7    | 66.2      | 173.3     | $?\delta_R(g^+)$            |
| tctADP-4  | -167.0     | 115.6    | -165.1   | 24.4       | -104.7   | 150.9    | -178.2     | 34.6     | -37.0    | 24.8     | -2.9     | 93.7      | -2.8      | $\epsilon\beta_S(g^+)$      |
| cttADP-5  | 10.1       | -124.9   | 30.8     | -175.0     | -83.2    | 73.5     | -178.2     | 34.8     | -39.5    | 28.3     | -6.6     | 69.2      | 170.8     | $?\gamma'(g^+)$             |
| tttADP-6  | -173.4     | -63.1    | -27.4    | 178.3      | -102.1   | 16.4     | 174.6      | 34.6     | -35.4    | 22.4     | -0.4     | 131.2     | 66.5      | $\delta_R\delta_R(s^+)$     |
| tttADP-7  | 175.1      | 121.3    | -29.5    | -174.4     | -90.1    | 79.0     | -177.1     | 28.4     | -35.8    | 29.1     | -11.6    | 116.2     | -28.6     | $?\gamma'(s^+)$             |
| tttADP-8  | 168.7      | -132.1   | 178.3    | -179.9     | -108.6   | 26.1     | 173.4      | 34.8     | -34.3    | 20.7     | 1.4      | 79.8      | -157.8    | $\epsilon''\delta_R(g^+)$   |
| tttADP-9  | -178.0     | 136.7    | -44.9    | 145.8      | -67.8    | 162.6    | -178.6     | 26.4     | -36.1    | 31.5     | -15.7    | 117.2     | -34.4     | $?\beta_P(s^+)$             |
| cttADP-10 | 4.6        | -91.8    | -13.6    | 178.2      | -114.6   | 6.2      | 177.3      | 35.2     | -36.8    | 24.4     | -2.3     | 66.8      | -176.5    | $\delta_R\delta_R(g^+)$     |
| cttADP-11 | 9.0        | -126.7   | 38.4     | -172.7     | -82.7    | 71.3     | -179.2     | 35.9     | -39.4    | 27.0     | -4.5     | 71.9      | 58.9      | $?\gamma'(g^+)$             |
| cctADP-12 | 15.3       | -121.9   | 10.2     | 5.3        | -88.4    | 11.2     | 179.0      | 35.1     | -38.8    | 27.2     | -5.2     | 74.8      | 179.6     | $\delta_R\delta_R(g^+)$     |
| tctADP-13 | -166.6     | 112.0    | -170.7   | 30.4       | -120.1   | 1.6      | 177.0      | 37.9     | -38.3    | 24.0     | -0.1     | 92.7      | -6.4      | $\epsilon\delta_R(s^+)$     |
| tttADP-14 | 173.9      | 136.0    | -50.1    | -172.8     | -89.5    | 76.6     | -176.9     | 27.6     | -35.2    | 28.7     | -11.7    | 149.4     | 174.0     | $?\gamma'(s^+)$             |
| cctADP-15 | 10.3       | -75.5    | -31.2    | -28.0      | -73.7    | 73.2     | -178.6     | 36.5     | -30.6    | 12.3     | 11.4     | 73.2      | -171.1    | $\alpha_R\gamma'(g^+)$      |
| tctADP-16 | 173.6      | 145.4    | -61.0    | -6.6       | -83.3    | 27.1     | 173.8      | 37.1     | -37.0    | 22.0     | 1.7      | 157.6     | 171.5     | $?\delta_R(t)$              |
| tctADP-17 | -170.8     | -73.8    | -37.8    | -26.7      | -52.5    | 174.6    | -179.8     | 31.7     | -36.4    | 26.8     | -7.0     | 63.5      | 175.0     | $\alpha_R\beta_P(g^+)$      |
| cctADP-18 | 22.0       | -137.0   | 41.3     | 29.7       | -104.8   | -15.7    | 175.8      | 32.8     | -39.3    | 30.2     | -9.9     | 68.0      | 59.4      | $?\delta_R(g^+)$            |
| cctADP-19 | 3.1        | -81.6    | -17.1    | -24.9      | -45.8    | 167.4    | 177.7      | 29.8     | -37.7    | 31.1     | -12.9    | 74.6      | 26.4      | $\delta_R\epsilon''(g^+)$   |
| tctADP-20 | -176.0     | -73.8    | -37.3    | -24.4      | -39.3    | -69.5    | 176.9      | 21.6     | -32.7    | 31.0     | -18.5    | 78.2      | 11.3      | $\alpha_R\alpha_R(g^+)$     |
| tttADP-21 | -178.0     | 147.1    | -52.2    | 149.9      | -66.1    | 161.2    | -178.5     | 26.8     | -35.9    | 30.8     | -14.6    | 156.9     | 172.9     | $?\beta_P(t)$               |
| tctADP-22 | 170.1      | 133.1    | -72.2    | -16.6      | -52.2    | 153.3    | -178.4     | 29.0     | -36.7    | 29.8     | -12.1    | 166.1     | -10.1     | $\gamma\beta_P(t)$          |
| cttADP-23 | 3.6        | -85.1    | -19.5    | -176.3     | -108.6   | 6.0      | 176.9      | 34.8     | -38.0    | 26.5     | -4.6     | 121.2     | 66.8      | $\delta_R\delta_R(s^+)$     |
| ttcADP-24 | -176.3     | -71.1    | -30.0    | 179.0      | -117.3   | 79.3     | -7.9       | 35.4     | -29.9    | 12.9     | 9.8      | 132.9     | 66.0      | $\alpha_R\zeta(s^+)$        |
| tccADP-25 | -169.7     | -118.6   | 22.9     | 21.1       | -95.2    | -19.1    | 4.0        | 31.1     | -37.5    | 29.0     | -9.7     | 85.6      | 63.2      | $\delta_R\delta_R(g^+)$     |
| cttADP-26 | -19.9      | -114.1   | 176.5    | 179.2      | -111.6   | 15.2     | 175.2      | 36.3     | -35.1    | 20.4     | 2.6      | 68.9      | -65.1     | $\epsilon''\delta_R(g^+)$   |
| cttADP-27 | -5.7       | -69.3    | -33.8    | -174.2     | -108.8   | 6.2      | 176.6      | 35.0     | -37.4    | 25.3     | -3.2     | 78.5      | 25.6      | $\alpha_R\delta_R(g^+)(BI)$ |
| cccADP-28 | -0.6       | 139.0    | -38.0    | -24.23     | -48.6    | 170.1    | -8.2       | 31.0     | -37.2    | 28.9     | -9.7     | 126.4     | 8.5       | $\delta_L\epsilon''(s^+)$   |
| cctADP-29 | -24.5      | -113.4   | 166.9    | -28.9      | -65.7    | -9.4     | -177.9     | 34.2     | -36.3    | 23.8     | -2.1     | 57.3      | -47.3     | $\epsilon''\delta_R(g^+)$   |
| cccADP-30 | -21.8      | 143.7    | -42.6    | -11.8      | -68.5    | -20.8    | 4.7        | 31.1     | -36.0    | 26.5     | -7.1     | 143.5     | 70.9      | $\delta_L\delta_R(s^+)$     |

**Table S3.** Dihedral angle values (in degrees) of all the optimized structures of Ac-azaAla-Pro-NHMe (**3**, **AAP**) at the B3LYP/6-311++G(d,p) level of theory in the gas phase.

|           | $\omega_0$ | $\varphi_1$ | $\psi_1$ | $\omega_1$ | $\varphi_2$ | $\psi_2$ | $\omega_2$ | $\chi_1$ | $\chi_2$ | $\chi_3$ | $\chi_4$ | Conformer                   |
|-----------|------------|-------------|----------|------------|-------------|----------|------------|----------|----------|----------|----------|-----------------------------|
| tttAAP-1  | -175.5     | -57.8       | -35.1    | -179.9     | -102.9      | 19.4     | 173.9      | 33.8     | -36.0    | 24.4     | -3.2     | $\alpha_R\delta_R(\beta I)$ |
| tttAAP-2  | -174.9     | -69.3       | -40.6    | -175.4     | -90.2       | 74.3     | -173.3     | 28.5     | -35.5    | 28.4     | -10.8    | $\alpha_R\gamma'$           |
| tttAAP-3  | 170.4      | 129.7       | -37.9    | -172.8     | -90.4       | 76.6     | -176.7     | 27.8     | -35.3    | 28.8     | -11.6    | $\delta_L\gamma'$           |
| tttAAP-4  | 170.2      | -125.2      | 169.6    | -179.1     | -88.0       | 77.2     | -176.3     | 24.1     | -35.9    | 33.3     | -19.0    | $\varepsilon''\gamma'$      |
| tctAAP-5  | 169.6      | 136.8       | -65.9    | -17.4      | -69.2       | 113.0    | -178.2     | 32.8     | -33.6    | 20.9     | -0.1     | $\delta_L\varepsilon''$     |
| cttAAP-6  | -10.9      | 131.9       | -35.3    | -173.4     | -88.6       | 75.9     | -176.9     | 29.2     | -36.7    | 29.6     | -11.6    | $\delta_L\gamma'$           |
| cttAAP-7  | 11.4       | -131.9      | 40.4     | -174.3     | -81.1       | 70.7     | -178.6     | 35.6     | -39.5    | 27.5     | -5.2     | $?\gamma'$                  |
| tctAAP-8  | -171.6     | -123.6      | 24.1     | 27.3       | -104.8      | -15.0    | -178.3     | 30.8     | -38.6    | 31.5     | -12.6    | $\delta_R\delta_R$          |
| tttAAP-9  | 170.3      | -128.4      | 173.1    | -176.5     | -116.6      | 13.3     | 174.6      | 35.4     | -36.1    | 23.2     | -0.9     | $\beta_S\delta_R$           |
| tctAAP-10 | -176.2     | -73.3       | -35.7    | -14.8      | -46.3       | -47.9    | 176.2      | 19.9     | -32.9    | 33.0     | -21.7    | $\alpha_R\alpha_R$          |
| cttAAP-11 | 2.6        | -77.9       | -29.8    | -175.5     | -111.6      | 8.2      | 176.7      | 34.8     | -37.2    | 25.4     | -3.5     | $\delta_R\delta_R$          |
| tctAAP-12 | -170.5     | 129.7       | -173.2   | 32.3       | -119.9      | -2.4     | 179.3      | 36.3     | -38.2    | 25.6     | -2.8     | $\varepsilon\delta_R$       |
| cctAAP-13 | 24.3       | -142.0      | 43.1     | 31.3       | -108.0      | -14.9    | 175.2      | 32.1     | -38.9    | 30.7     | -10.8    | $?\delta_R$                 |
| tttAAP-14 | 179.0      | 141.6       | -44.3    | 148.6      | -67.3       | 159.5    | -178.6     | 25.3     | -35.8    | 32.2     | -17.2    | $?\beta_P$                  |
| cctAAP-15 | -2.7       | -109.0      | 17.6     | -2.5       | -80.7       | 144.2    | 178.5      | 33.6     | -36.4    | 24.9     | -3.7     | $\delta_R\beta_P$           |
| cttAAP-16 | -14.9      | -103.1      | 170.0    | -174.7     | -110.6      | 13.2     | 173.9      | 34.9     | -36.8    | 24.7     | -2.7     | $\varepsilon''\delta_R$     |
| cctAAP-17 | -15.2      | -112.2      | 163.1    | -20.7      | -74.9       | -3.7     | -178.9     | 35.0     | -36.2    | 22.9     | -0.7     | $\beta_S\delta_R$           |
| ttcAAP-18 | -178.6     | -67.2       | -35.2    | 179.7      | -117.7      | 79.8     | -7.8       | 34.8     | -30.1    | 13.9     | 8.3      | $\alpha_R\zeta$             |
| cctAAP-19 | 15.3       | -69.9       | -43.4    | -13.0      | -75.0       | 53.0     | -179.1     | 36.0     | -36.0    | 21.6     | 1.2      | $\alpha_R\gamma'$           |
| cccAAP-20 | -13.6      | 123.9       | -15.0    | 1.7        | -76.0       | 163.5    | -11.7      | 34.2     | -37.4    | 26.0     | -4.5     | $\delta_L\beta_P$           |
| tccAAP-21 | -170.7     | -124.2      | 25.0     | 23.7       | -99.5       | -18.1    | 1.5        | 30.8     | -37.7    | 29.9     | -10.9    | $\delta_R\delta_R$          |
| cccAAP-22 | -21.5      | 144.4       | -49.6    | -13.2      | -69.9       | -19.9    | 0.4        | 31.2     | -35.2    | 25.3     | -5.8     | $\delta_L\delta_R$          |

**Table S4.** Dihedral angle values (in degrees) of all the optimized structures of Ac-azaAsn-Pro-NHMe at the SMD/B3LYP/6-311++G(d,p) level of theory in water.

|           | $\omega_0$ | $\varphi_1$ | $\psi_1$ | $\omega_1$ | $\varphi_2$ | $\psi_2$ | $\omega_2$ | $\chi_1$ | $\chi_2$ | $\chi_3$ | $\chi_4$ | $\chi_1'$ | $\chi_2'$ | Conformer                        |
|-----------|------------|-------------|----------|------------|-------------|----------|------------|----------|----------|----------|----------|-----------|-----------|----------------------------------|
| tttANP-1  | -178.5     | -61.7       | -33.1    | -179.6     | -92.5       | 2.9      | 175.9      | 31.8     | -36.6    | 27.1     | -7.2     | 66.4      | -165.3    | $\alpha_R\delta_R(g^+)(\beta I)$ |
| tctANP-2  | -169.5     | -129.9      | 31.9     | 20.5       | -101.1      | -11.2    | -179.9     | 33.4     | -39.0    | 29.3     | -8.5     | 75.7      | 167.1     | $?\delta_R(g^+)$                 |
| tttANP-3  | -177.5     | -70.7       | -34.0    | -171.5     | -92.3       | 74.6     | -175.0     | 29.1     | -36.5    | 29.3     | -11.5    | 64.1      | -158.1    | $\delta_R\gamma'(g^+)$           |
| tttANP-4  | -178.4     | -67.3       | -30.9    | -178.6     | -98.7       | 4.4      | 177.6      | 34.2     | -35.6    | 23.1     | -1.4     | 123.9     | 63.1      | $\alpha_R\delta_R(s^+)(\beta I)$ |
| ttANP-5   | 175.8      | 113.2       | -14.7    | -174.1     | -89.5       | 71.4     | -177.3     | 30.5     | -37.5    | 29.5     | -10.8    | 124.0     | -32.7     | $\delta_L\gamma'(s^+)$           |
| cttANP-6  | 6.7        | -122.7      | 29.9     | -173.2     | -84.5       | 59.4     | -179.2     | 36.0     | -40.9    | 29.2     | -6.9     | 76.9      | 165.3     | $?\gamma'(g^+)$                  |
| tctANP-7  | -172.9     | 96.1        | -168.6   | 26.8       | -111.0      | -13.3    | -179.3     | 34.9     | -38.1    | 26.4     | -4.5     | 82.0      | 3.4       | $\varepsilon\delta_R(g^+)$       |
| tttANP-8  | -178.8     | -61.2       | -36.2    | -179.3     | -96.4       | 7.0      | 177.4      | 33.5     | -35.7    | 23.8     | -3.0     | 76.3      | 16.6      | $\alpha_R\delta_R(g^+)(\beta I)$ |
| tttANP-9  | -177.1     | -123.9      | 173.5    | 179.1      | -96.0       | 12.4     | 175.2      | 32.4     | -37.2    | 27.4     | -7.2     | 74.9      | -148.1    | $\beta_S\delta_R(g^+)$           |
| cttANP-10 | 7.1        | -126.1      | 38.4     | -171.7     | -82.2       | 56.4     | 178.5      | 36.5     | -41.5    | 29.6     | -6.9     | 64.1      | 52.2      | $\beta\gamma'(g^+)$              |
| cttANP-11 | -7.4       | 112.6       | -9.8     | -173.5     | -89.0       | 69.6     | -177.0     | 32.0     | -38.2    | 29.0     | -9.3     | 112.7     | 51.0      | $\delta_L\gamma'(s^+)$           |
| tttANP-12 | -179.8     | 79.0        | 14.2     | -177.4     | -62.8       | 149.1    | 175.6      | 33.8     | -36.9    | 25.5     | -4.2     | 102.4     | -19.9     | $\delta_L\beta_P(s^+)$           |
| tctANP-13 | 173.5      | 124.6       | -20.5    | -27.7      | -63.2       | 175.2    | 177.4      | 37.5     | -34.5    | 18.1     | 5.9      | 126.9     | -33.6     | $\delta_L\varepsilon''(s^+)$     |
| tctANP-14 | 172.3      | 134.2       | -38.8    | -25.5      | -59.5       | -179.9   | -179.4     | 37.4     | -36.3    | 20.9     | 3.0      | 137.9     | -10.3     | $?\beta_P(g^+)$                  |
| tttANP-15 | 175.3      | -92.2       | 161.5    | 170.3      | -71.6       | 148.6    | 175.7      | 24.3     | -35.3    | 32.1     | -17.7    | 61.9      | 82.6      | $\varepsilon''\beta_P(g^+)$      |
| cctANP-16 | 7.9        | -96.1       | -9.4     | -21.1      | -58.0       | 174.9    | 178.9      | 34.8     | -36.6    | 24.1     | -2.1     | 91.2      | 6.6       | $\delta_R\varepsilon''(s^+)$     |
| cctANP-17 | 13.5       | -124.4      | 21.4     | 8.9        | -86.9       | -12.9    | 177.4      | 31.9     | -38.0    | 29.1     | -9.3     | 78.2      | 170.1     | $\delta_R\delta_R(g^+)$          |
| ctANP-18  | 6.7        | -107.6      | 9.3      | 179.9      | -84.8       | -8.1     | 179.7      | 31.4     | -37.3    | 28.4     | -8.9     | 80.9      | 175.5     | $\delta_R\delta_R(g^+)$          |
| tcANP-19  | -177.7     | -63.3       | -44.8    | -16.8      | -62.7       | -22.8    | 180.0      | 30.5     | -35.4    | 26.2     | -7.1     | 77.7      | 17.4      | $\alpha_R\delta_R(g^+)$          |
| ctANP-20  | -8.1       | -95.3       | 171.2    | 179.2      | -95.3       | 12.5     | 175.8      | 32.5     | -37.5    | 27.8     | -7.5     | 74.9      | -146.3    | $\varepsilon''\delta_R(g^+)$     |
| ccANP-21  | 8.4        | -85.6       | -27.0    | -40.8      | -69.9       | 86.1     | -176.2     | 30.7     | -14.4    | -7.8     | 28.6     | 63.7      | -163.1    | $\delta_R\gamma'(g^+)$           |
| ccANP-22  | 13.7       | -130.4      | 30.3     | 17.0       | -95.0       | -14.0    | -178.9     | 32.6     | -38.0    | 28.4     | -8.2     | 66.9      | 55.8      | $?\delta_R(g^+)$                 |
| cttANP-23 | 0.5        | -84.4       | -18.7    | -177.9     | -97.3       | 0.6      | 178.6      | 33.2     | -36.4    | 25.4     | -4.5     | 111.2     | 54.4      | $\delta_R\delta_R(s^+)$          |
| tctANP-24 | -177.3     | -64.9       | -40.3    | -22.1      | -59.8       | 151.4    | 175.6      | 32.4     | -34.9    | 23.6     | -3.1     | 61.2      | -153.2    | $\alpha_R\beta_P(g^+)$           |
| tctANP-25 | 173.2      | 133.9       | -40.0    | -10.3      | -71.7       | -11.7    | -179.8     | 33.1     | -36.0    | 24.5     | -3.7     | 152.6     | 151.9     | $?\delta_R(t)$                   |
| cttANP-26 | 0.2        | -81.6       | -20.9    | 179.1      | -96.5       | -1.4     | 179.3      | 32.3     | -35.7    | 25.1     | -4.8     | 94.9      | 5.0       | $\delta_R\delta_R(s^+)$          |
| tttANP-27 | 174.9      | 129.1       | -36.1    | -174.2     | -92.0       | 80.3     | -175.6     | 28.2     | -35.6    | 28.8     | -11.5    | 148.2     | 153.8     | $\delta_L\gamma'(s^+)$           |
| ttcANP-28 | -179.1     | -76.3       | -27.9    | -179.4     | -119.1      | 80.0     | -2.8       | 35.0     | -29.0    | 11.8     | 10.6     | 120.5     | 66.4      | $\delta_R\zeta(s^+)$             |
| tecANP-29 | -168.0     | -128.8      | 32.6     | 19.0       | -95.3       | -17.5    | 5.8        | 32.9     | -38.3    | 28.6     | -8.1     | 70.2      | 54.0      | $\beta\delta_R(g^+)$             |
| tttANP-30 | 173.3      | 131.6       | -42.8    | -175.7     | -79.5       | 145.7    | 178.1      | 23.8     | -34.9    | 32.0     | -17.8    | 155.5     | 151.9     | $\gamma\beta_P(t)$               |
| cctANP-31 | 0.7        | -119.0      | 165.6    | -26.2      | -68.5       | -13.7    | 178.6      | 34.6     | -34.9    | 21.2     | 0.9      | 61.4      | -157.2    | $\beta_S\delta_R(g^+)$           |
| cccANP-32 | -6.8       | 140.9       | -43.9    | -23.7      | -58.6       | 168.2    | -8.3       | 34.0     | -35.7    | 23.3     | -1.7     | 146.8     | -13.8     | $\gamma\varepsilon''(s^+)$       |
| cccANP-33 | -8.3       | 134.1       | -35.0    | -7.8       | -71.6       | -18.7    | -2.0       | 32.1     | -34.7    | 23.6     | -3.3     | 149.1     | 152.6     | $\delta_L\delta_R(s^+)$          |



**Table S5.** Dihedral angle values (in degrees) of all the optimized structures of Ac-azaAsp-Pro-NHMe at the SMD/B3LYP/6-311++G(d,p) level of theory in water.

|           | $\omega_0$ | $\varphi_1$ | $\psi_1$ | $\omega_1$ | $\varphi_2$ | $\psi_2$ | $\omega_2$ | $\chi_1$ | $\chi_2$ | $\chi_3$ | $\chi_4$ | $\chi_1'$ | $\chi_2'$ | Conformer                        |
|-----------|------------|-------------|----------|------------|-------------|----------|------------|----------|----------|----------|----------|-----------|-----------|----------------------------------|
| tttADP-1  | -178.7     | -61.7       | -33.6    | -179.5     | -91.8       | 2.8      | 176.3      | 31.8     | -36.9    | 27.5     | -7.6     | 69.9      | -170.1    | $\alpha_R\delta_R(g^+)$          |
| tttADP-2  | -176.8     | -70.1       | -35.2    | -171.6     | -92.0       | 69.5     | -176.4     | 29.9     | -36.9    | 29.1     | -10.6    | 65.9      | -169.7    | $\alpha_R\gamma'(g^+)$           |
| tctADP-3  | -169.2     | -131.0      | 33.3     | 21.2       | -101.5      | -12.9    | -179.8     | 33.2     | -38.8    | -29.2    | -8.6     | 72.8      | 175.9     | $?\delta_R(g^+)$                 |
| tctADP-4  | -173.4     | 116.3       | -162.0   | 23.1       | -105.0      | 154.0    | -179.7     | 34.6     | -37.4    | 25.3     | -3.5     | 89.2      | -5.1      | $\varepsilon\beta_S(g^+)$        |
| cttADP-5  | 5.5        | -121.8      | 29.9     | -172.8     | -84.3       | 59.4     | -179.5     | 35.9     | -41.0    | 29.4     | -7.1     | 77.7      | 170.6     | $?\gamma'(g^+)$                  |
| tttADP-6  | -177.0     | -69.0       | -28.2    | -178.4     | -94.7       | 3.1      | 178.0      | 34.1     | -35.8    | 23.4     | -1.9     | 134.7     | 59.9      | $\delta_R\delta_R(s^+)$          |
| tttADP-7  | -179.1     | 80.1        | 25.4     | -171.2     | -81.4       | 49.0     | 177.5      | 37.4     | -41.9    | 29.4     | -6.1     | 104.6     | -31.6     | $\delta_L\beta(s^+)$             |
| tttADP-8  | -177.3     | -121.9      | 173.7    | 179.2      | -97.6       | 2.6      | 178.1      | 32.6     | -36.3    | 25.8     | -5.3     | 73.3      | -172.5    | $\varepsilon''\delta_R(g^+)$     |
| tttADP-9  | -178.9     | 82.2        | 21.7     | -178.5     | -61.2       | 148.9    | 175.6      | 33.6     | -37.1    | 25.8     | -4.6     | 106.1     | -32.5     | $\delta_L\beta_P(s^+)$           |
| cttADP-10 | 6.4        | -99.2       | -2.2     | -179.0     | -87.4       | -4.6     | 178.5      | 30.7     | -36.8    | 28.4     | -9.3     | 91.0      | 179.7     | $\delta_R\delta_R(s^+)$          |
| cttADP-11 | 6.3        | -125.8      | 40.3     | -170.5     | -82.9       | 56.4     | 178.3      | 36.3     | -41.4    | 29.6     | -7.1     | 74.5      | 55.1      | $\beta\gamma'(g^+)$              |
| cctADP-12 | 13.2       | -123.9      | 21.3     | 9.1        | -87.4       | -13.3    | 178.3      | 32.0     | -38.1    | 29.0     | -9.2     | 77.2      | 175.8     | $?\delta_R(g^+)$                 |
| tctADP-13 | -173.4     | 114.5       | -166.0   | 27.2       | -112.0      | -11.3    | -179.1     | 35.7     | -38.0    | 25.5     | -3.0     | 91.3      | -7.6      | $\varepsilon\delta_R(s^+)$       |
| tttADP-14 | 175.5      | 128.0       | -33.9    | -174.6     | -92.0       | 80.0     | -175.3     | 28.3     | -35.6    | 28.6     | -11.3    | 141.8     | 167.0     | $?\gamma'(s^+)$                  |
| cctADP-15 | 7.3        | -86.9       | -25.2    | -39.8      | -69.4       | 97.4     | -175.0     | 30.3     | -15.0    | -6.3     | 26.8     | 65.5      | -173.1    | $\delta_R\varepsilon''(g^+)$     |
| tctADP-16 | 171.1      | 132.3       | -39.8    | -12.2      | -73.2       | -6.6     | 178.1      | 34.5     | -35.5    | 22.4     | -0.5     | 147.8     | 164.1     | $\delta_L\delta_R(s^+)$          |
| tctADP-17 | -174.8     | -67.4       | -39.6    | -23.4      | -59.8       | 153.8    | 175.5      | 33.9     | -34.3    | 21.2     | 0.4      | 68.0      | -170.9    | $\alpha_R\beta_P(g^+)$           |
| cctADP-18 | 12.9       | -128.1      | 30.2     | 13.6       | -91.1       | -14.0    | 178.1      | 33.6     | -38.1    | 27.4     | -6.4     | 80.5      | 57.2      | $?\delta_R(g^+)$                 |
| cctADP-19 | 7.0        | -93.0       | -14.4    | -21.2      | -55.7       | -179.8   | -179.2     | 34.9     | -38.0    | 26.3     | -4.4     | 90.1      | 10.0      | $\delta_R\varepsilon'(g^+)$      |
| tctADP-20 | -177.5     | -67.0       | -47.6    | -21.5      | -45.8       | -67.9    | 179.1      | 24.4     | -32.5    | 27.5     | -12.8    | 74.6      | 17.6      | $\alpha_R\alpha_R(g^+)$          |
| tttADP-21 | 174.0      | 129.4       | -39.2    | -176.6     | -80.1       | 146.0    | 178.0      | 24.9     | -34.9    | 31.0     | -16.0    | 147.7     | 162.9     | $\delta_L\beta_P(s^+)$           |
| tctADP-22 | 172.4      | 133.7       | -40.6    | -25.6      | -57.4       | -174.2   | -178.4     | 37.2     | -37.1    | 22.5     | 1.2      | 137.7     | -9.3      | $\delta_L\varepsilon'(s^+)$      |
| cttADP-23 | 7.1        | -127.6      | 37.8     | -174.6     | -69.1       | -23.2    | -178.6     | 31.4     | -37.5    | 28.4     | -8.9     | 74.4      | 58.4      | $?\delta_R(g^+)$                 |
| ttcADP-24 | -175.6     | 127.6       | 41.6     | -178.0     | -63.2       | 152.7    | -2.7       | 32.1     | -37.6    | 27.9     | -7.9     | 74.7      | 54.8      | $\delta_L\beta_P(g^+)$           |
| tecADP-25 | -168.5     | -129.1      | 34.5     | 16.2       | -92.9       | -17.9    | 4.9        | 33.1     | -37.7    | 27.3     | -6.5     | 78.7      | 56.4      | $\beta\delta_R(g^+)$             |
| cttADP-26 | -8.3       | -93.0       | 167.1    | -178.6     | -96.7       | 1.7      | 177.9      | 32.3     | -36.4    | 26.3     | -6.1     | 68.7      | -169.4    | $\varepsilon''\delta_R(g^+)$     |
| cttADP-27 | 0.9        | -76.2       | -28.7    | -178.4     | -97.4       | 1.3      | 178.6      | 32.9     | -36.1    | 25.0     | -4.3     | 79.9      | 18.7      | $\delta_R\delta_R(g^+)(\beta I)$ |
| cccADP-28 | -7.8       | 140.0       | -49.1    | -25.2      | -55.0       | 176.5    | -3.7       | 34.5     | -36.3    | 23.7     | -1.8     | 150.1     | -11.2     | $?\varepsilon''(s^+)$            |
| cctADP-29 | -1.5       | -114.7      | 165.0    | -26.8      | -67.3       | -14.6    | 178.0      | 33.9     | -34.4    | 21.0     | 0.7      | 66.0      | -172.6    | $\beta_S\delta_R(g^+)$           |
| cccADP-30 | -10.4      | 98.8        | 21.7     | 23.7       | -95.6       | -22.4    | 4.7        | 31.9     | -36.8    | 27.1     | -7.2     | 102.2     | 51.1      | $\delta_L\delta_R(s^+)$          |

**Table S6.** Dihedral angle values (in degrees) of all the optimized structures of Ac-azaAla-Pro-NHMe at the SMD/B3LYP/6-311++G(d,p) level of theory in water.

|           | $\omega_0$ | $\varphi_1$ | $\psi_1$ | $\omega_1$ | $\varphi_2$ | $\psi_2$ | $\omega_2$ | $\chi_1$ | $\chi_2$ | $\chi_3$ | $\chi_4$ | Conformer                   |
|-----------|------------|-------------|----------|------------|-------------|----------|------------|----------|----------|----------|----------|-----------------------------|
| tttAAP-1  | -178.0     | -60.3       | -37.7    | -178.3     | -94.8       | 4.9      | 178.0      | 33.5     | -36.5    | 25.1     | -4.0     | $\alpha_R\delta_R(\beta I)$ |
| tttAAP-2  | -177.9     | -66.4       | -37.6    | -171.9     | -91.7       | 71.3     | -178.4     | 30.4     | -35.8    | 26.9     | -8.1     | $\alpha_R\gamma'$           |
| tttAAP-3  | 173.6      | 130.4       | -41.5    | 174.2      | -91.8       | 76.1     | -175.4     | 28.4     | -35.6    | 28.6     | -11.3    | $?\gamma'$                  |
| tttAAP-4  | 177.2      | -90.8       | 163.7    | 178.6      | -78.2       | 143.3    | 176.2      | 24.2     | -35.4    | 32.4     | -18.0    | $\beta_P\beta_P$            |
| tctAAP-5  | 170.8      | 136.5       | -46.7    | -24.6      | -68.9       | 125.5    | -179.9     | 32.2     | -27.5    | 11.9     | 9.1      | $\delta_L\epsilon''$        |
| cttAAP-6  | -5.9       | 126.1       | -29.7    | -171.4     | -91.2       | 69.1     | -176.8     | 30.5     | -37.0    | 28.7     | -9.9     | $\delta_L\gamma'$           |
| cttAAP-7  | 7.6        | -130.1      | 38.9     | -173.5     | -81.5       | 48.6     | 176.7      | 37.6     | -41.5    | 28.7     | -5.2     | $?\gamma'$                  |
| tctAAP-8  | -168.3     | -132.7      | 33.9     | 20.1       | -101.1      | -13.3    | -179.0     | 32.6     | -38.3    | 29.1     | -8.8     | $\beta\delta_R$             |
| tttAAP-9  | -178.0     | -112.5      | 166.9    | 176.9      | -91.5       | -2.1     | 179.3      | 30.9     | -36.9    | 28.2     | -9.0     | $\epsilon''\delta_R$        |
| tctAAP-10 | -175.5     | -67.7       | -40.8    | -13.2      | -62.6       | -20.6    | -179.5     | 30.6     | -36.0    | 27.1     | -8.1     | $\alpha_R\delta_R$          |
| cttAAP-11 | 2.9        | -77.6       | -29.6    | -177.5     | -94.4       | -1.3     | 177.8      | 31.6     | -36.0    | 26.3     | -6.5     | $\delta_R\delta_R$          |
| tctAAP-12 | 177.0      | 122.9       | -170.9   | 24.0       | -111.2      | 13.3     | -180.0     | 35.3     | -37.9    | 25.7     | -3.4     | $\epsilon\delta_R$          |
| cctAAP-13 | 15.5       | -136.7      | 36.0     | 20.3       | -99.4       | -14.4    | -179.8     | 32.3     | -38.5    | 29.5     | -9.5     | $?\delta_R$                 |
| tttAAP-14 | 171.6      | 134.5       | -44.4    | -175.9     | -83.7       | 146.1    | 175.8      | 24.8     | -35.0    | 31.3     | -16.4    | $\delta_L\beta_P$           |
| cctAAP-15 | 16.0       | -136.6      | 32.7     | 12.2       | -92.8       | 169.7    | 175.9      | 35.2     | -39.2    | 27.9     | -5.9     | $?\epsilon''$               |
| cttAAP-16 | -6.3       | -93.8       | 165.6    | 178.3      | -89.9       | -4.7     | 178.7      | 30.0     | -36.7    | 28.8     | -10.3    | $\epsilon''\delta_R$        |
| cctAAP-17 | 5.1        | -129.2      | 160.5    | -15.4      | -69.1       | -18.8    | 178.7      | 32.4     | -35.7    | 24.6     | -4.2     | $\beta_S\delta_R$           |
| ttcAAP-18 | -178.5     | -64.7       | -43.2    | -177.3     | -86.4       | 158.8    | -1.7       | 30.0     | -35.5    | 27.0     | -8.2     | $\alpha_R\beta_P$           |
| cctAAP-19 | 7.5        | -73.1       | -32.8    | -15.6      | -74.2       | -8.4     | -178.3     | 34.7     | -34.2    | 20.1     | 2.1      | $\delta_R\delta_R$          |
| cccAAP-20 | -8.3       | 139.1       | -41.6    | -24.9      | -64.1       | 166.9    | -3.4       | 35.5     | -34.2    | 19.4     | 3.4      | $\delta_L\epsilon''$        |
| tccAAP-21 | -167.2     | -133.0      | 35.8     | 15.4       | -94.5       | -17.8    | 6.3        | 32.4     | -37.8    | 28.2     | -8.0     | $?\delta_R$                 |
| cccAAP-22 | -10.4      | 139.8       | -48.1    | -12.0      | -70.3       | -18.5    | 0.6        | 31.7     | -35.1    | 24.6     | -4.7     | $\delta_L\delta_R$          |

**Table S7.** Dihedral angle values (in degrees) of all the optimized structures of Ac-azaAsn-Pro-NHMe at the B3LYP-D3/6-311++G(d,p) level of theory in the gas phase.

|           | $\omega_0$ | $\varphi_1$ | $\psi_1$ | $\omega_1$ | $\varphi_2$ | $\psi_2$ | $\omega_2$ | $\chi_1$ | $\chi_2$ | $\chi_3$ | $\chi_4$ | $\chi_1'$ | $\chi_2'$ | Conformer                    |
|-----------|------------|-------------|----------|------------|-------------|----------|------------|----------|----------|----------|----------|-----------|-----------|------------------------------|
| tttANP-1  | -173.6     | -60.3       | -31.6    | 178.1      | -103.2      | 17.6     | 174.8      | 35.6     | -36.4    | 23.2     | -0.7     | 64.3      | 171.2     | $\alpha_R\delta_R(g^+)$      |
| tctANP-2  | -173.0     | -127.0      | 30.4     | 22.8       | -100.4      | -13.5    | 176.2      | 31.6     | -39.5    | 31.9     | -12.5    | 71.6      | 157.6     | $?\delta_R(g^+)$             |
| tttANP-3  | -175.0     | -63.6       | -41.0    | 173.7      | -87.8       | 74.5     | -165.8     | 30.1     | -36.6    | 28.5     | -9.9     | 64.1      | 173.5     | $\alpha_R\gamma'(g^+)$       |
| tttANP-4  | -177.1     | -60.2       | -28.7    | 177.8      | -103.0      | 17.2     | 174.8      | 35.9     | -36.2    | 22.6     | 0.2      | 123.7     | 77.8      | $\delta_R\delta_R(s^+)$      |
| ttANP-5   | 175.2      | 112.8       | -25.5    | -173.6     | -90.5       | 77.5     | -175.5     | 30.2     | -37.1    | 29.3     | -10.6    | 118.7     | -22.0     | $\delta_L\gamma'(s^+)$       |
| cttANP-6  | 8.6        | -122.6      | 30.1     | -176.1     | -83.3       | 73.2     | -176.7     | 35.2     | -40.2    | 29.1     | -7.1     | 73.5      | 159.8     | $?\gamma'(g^+)$              |
| tctANP-7  | -167.7     | 106.3       | -163.6   | 39.2       | -116.4      | -5.2     | 171.6      | 36.3     | -40.6    | 29.1     | -6.4     | 101.8     | -15.2     | $\varepsilon\delta_R(s^+)$   |
| tttANP-8  | -172.9     | -59.9       | -33.3    | 179.0      | -102.1      | 18.3     | 174.5      | 35.8     | -36.6    | 23.3     | -0.6     | 68.4      | 27.2      | $\delta_R\delta_R(g^+)$      |
| tttANP-9  | 170.2      | -146.2      | 176.0    | 177.1      | -107.1      | 24.1     | 174.1      | 36.2     | -35.6    | 21.3     | 1.7      | 66.3      | -122.3    | $\beta_S\delta_R(g^+)$       |
| cttANP-10 | 7.0        | -126.9      | 40.1     | -174.1     | -81.7       | 70.6     | -177.7     | 36.6     | -40.6    | 28.3     | -5.4     | 61.9      | 48.8      | $\beta\gamma'(g^+)$          |
| cttANP-11 | 5.2        | 77.0        | 22.5     | -171.1     | -82.2       | 68.5     | -178.2     | 37.9     | -40.7    | 27.1     | -3.4     | -83.9     | 70.9      | $\delta_L\gamma'(g^-)$       |
| tttANP-12 | -177.1     | 128.8       | -44.8    | 141.7      | -59.0       | 155.4    | -179.2     | 24.2     | -37.1    | 35.4     | -21.4    | 177.3     | -21.9     | $?\beta_P(t)$                |
| tctANP-13 | -179.1     | 177.7       | -102.5   | -1.2       | -62.3       | 144.6    | 179.4      | 28.4     | -38.2    | 32.6     | -15.5    | 68.1      | 23.4      | $\varepsilon\beta_P(g^+)$    |
| tctANP-14 | 169.8      | 135.2       | -73.4    | -15.8      | -57.3       | 136.2    | -177.0     | 30.6     | -37.2    | 28.8     | -9.9     | 167.0     | -10.4     | $\gamma\beta_P(t)$           |
| tttANP-15 | 171.0      | -74.6       | 158.4    | 170.8      | -80.0       | 153.6    | -179.9     | 26.2     | -36.7    | 32.7     | -17.1    | 67.2      | 101.3     | $\beta_P\beta_P(g^+)$        |
| cctANP-16 | -4.6       | -85.6       | 4.3      | -16.4      | -53.1       | 154.3    | -177.5     | 30.7     | -38.6    | 31.5     | -12.7    | 67.4      | 15.5      | $\delta_R\varepsilon''(g^+)$ |
| cctANP-17 | 14.4       | -120.5      | 13.9     | 2.9        | -84.8       | 9.9      | 175.9      | 36.0     | -39.8    | 27.9     | -5.4     | 76.8      | 170.7     | $\delta_R\delta_R(g^+)$      |
| ctANP-18  | -23.4      | -66.6       | -11.4    | 169.6      | -123.7      | 1.7      | -178.3     | 37.7     | -35.6    | 20.2     | 3.7      | 69.1      | -178.3    | $\delta_R\delta_R(g^+)$      |
| tcANP-19  | -177.8     | -66.5       | -37.1    | -27.8      | -35.1       | -55.1    | 175.2      | 20.8     | -33.2    | 32.7     | -20.8    | 71.1      | 18.6      | $\alpha_R\alpha_R(g^+)$      |
| ctANP-20  | -16.2      | -106.7      | 168.5    | 179.7      | -107.1      | 17.3     | 175.0      | 37.1     | -36.7    | 22.2     | 1.5      | 72.4      | -84.3     | $\varepsilon''\delta_R(g^+)$ |
| ccANP-21  | 7.7        | -71.0       | -28.4    | -31.2      | -70.0       | 74.8     | -177.6     | 37.2     | -32.3    | 14.5     | 9.5      | 68.2      | -170.7    | $\delta_R\gamma'(g^+)$       |
| ccANP-22  | 15.1       | -134.4      | 45.0     | 33.2       | -106.0      | -12.9    | 170.7      | 33.3     | -40.6    | 32.1     | -11.5    | 56.8      | 47.3      | $?\delta_R(g^+)$             |
| cttANP-23 | -26.7      | -54.3       | -27.7    | 175.5      | -116.8      | -0.9     | -178.3     | 37.1     | -36.2    | 21.6     | 2.0      | 121.2     | 74.8      | $\delta_R\delta_R(s^+)$      |
| tctANP-24 | -171.7     | -74.3       | -37.2    | -27.8      | -42.5       | 139.1    | -174.4     | 29.1     | -38.0    | 32.2     | -14.5    | 66.1      | 168.0     | $\alpha_R\beta_P(g^+)$       |
| tctANP-25 | -178.7     | 122.4       | -16.5    | -2.3       | -66.2       | -11.3    | 175.3      | 31.1     | -39.1    | 31.7     | -12.6    | 100.3     | -162.8    | $\delta_L\delta_R(s^+)$      |
| cttANP-26 | -20.3      | -57.3       | -30.8    | 179.8      | -112.4      | 3.5      | 177.7      | 36.6     | -37.0    | 23.3     | -0.2     | 70.5      | 27.5      | $\delta_R\delta_R(g^+)$      |
| tttANP-27 | 174.4      | 133.3       | -52.9    | -171.9     | -90.5       | 75.1     | -175.5     | 29.3     | -36.3    | 28.7     | -10.6    | 158.2     | 155.7     | $\gamma\gamma'(t)$           |
| ttcANP-28 | -179.6     | -70.1       | -28.4    | 179.2      | -118.2      | 74.9     | -6.5       | 36.6     | -32.0    | 15.2     | 8.1      | 123.1     | 76.3      | $\delta_R\zeta(s^+)$         |
| tecANP-29 | -169.1     | -123.5      | 27.7     | 18.9       | -92.7       | -18.0    | 12.2       | 31.5     | -39.2    | 31.4     | -12.1    | 72.2      | 98.7      | $\delta_R\delta_R(g^+)$      |
| tttANP-30 | -176.3     | 144.8       | -53.2    | 146.4      | -61.0       | 158.7    | -179.2     | 27.1     | -37.4    | 33.0     | -16.8    | 165.3     | 153.6     | $\gamma\beta_P(t)$           |
| cctANP-31 | -18.8      | -110.3      | 163.4    | -27.6      | -62.9       | -11.8    | -178.7     | 33.5     | -37.8    | 27.0     | -6.0     | 71.0      | -75.3     | $\beta_S\delta_R(g^+)$       |
| cccANP-32 | 4.5        | 130.8       | -30.2    | -23.3      | -48.7       | 166.4    | -7.4       | 31.7     | -38.5    | 30.4     | -10.8    | 128.6     | 1.0       | $\delta_L\varepsilon''(s^+)$ |
| cccANP-33 | -20.3      | 141.5       | -42.9    | -10.4      | -66.2       | -17.8    | 9.9        | 32.4     | -38.3    | 29.0     | -8.9     | 147.8     | 123.0     | $\delta_L\delta_R(s^+)$      |

**Table S8.** Dihedral angle values (in degrees) of all the optimized structures of Ac-azaAsp-Pro-NHMe at the B3LYP-D3/6-311++G(d,p) level of theory in the gas phase.

|           | $\omega_0$ | $\varphi_1$ | $\psi_1$ | $\omega_1$ | $\varphi_2$ | $\psi_2$ | $\omega_2$ | $\chi_1$ | $\chi_2$ | $\chi_3$ | $\chi_4$ | $\chi_1'$ | $\chi_2'$ | Conformer                    |
|-----------|------------|-------------|----------|------------|-------------|----------|------------|----------|----------|----------|----------|-----------|-----------|------------------------------|
| tttADP-1  | -175.7     | -59.2       | -32.4    | 178.3      | -103.4      | 18.5     | 174.5      | 35.7     | -36.4    | 23.1     | -0.5     | 63.2      | 178.0     | $\alpha_R\delta_R(g^+)$      |
| tttADP-2  | -176.8     | -62.3       | -41.5    | 173.7      | -87.9       | 75.1     | -166.1     | 30.2     | -36.4    | 28.1     | -9.4     | 63.8      | 177.5     | $\alpha_R\gamma'(g^+)$       |
| tctADP-3  | -173.7     | -127.3      | 29.9     | 24.2       | -101.5      | -13.9    | 177.3      | 31.6     | -39.6    | 32.1     | -12.6    | 67.8      | 171.2     | $?\delta_R(g^+)$             |
| tctADP-4  | -166.9     | 110.9       | -163.6   | 24.9       | -104.1      | 151.8    | -177.5     | 35.1     | -38.3    | 26.4     | -4.2     | 92.8      | 0.0       | $\varepsilon\beta_S(s^+)$    |
| cttADP-5  | 6.4        | -123.3      | 32.4     | -175.9     | -82.6       | 73.4     | -177.0     | 35.6     | -40.2    | 28.7     | -6.6     | 70.1      | 170.2     | $\beta\gamma'(g^+)$          |
| tttADP-6  | -177.0     | -60.1       | -29.1    | 178.5      | -102.0      | 17.0     | 174.9      | 36.2     | -36.2    | 22.2     | 0.8      | 132.8     | 66.3      | $\delta_R\delta_R(s^+)$      |
| tttADP-7  | 177.2      | 113.1       | -23.5    | -174.4     | -90.4       | 78.6     | -175.6     | 30.0     | -37.1    | 29.5     | -11.0    | 117.5     | -29.4     | $\delta_L\gamma'(s^+)$       |
| tttADP-8  | 169.1      | -134.2      | 178.9    | 179.3      | -108.6      | 26.7     | 173.4      | 36.1     | -35.3    | 21.0     | 2.0      | 80.5      | -160.8    | $\varepsilon''\delta_R(g^+)$ |
| tttADP-9  | -176.3     | 133.7       | -45.8    | 142.0      | -61.1       | 157.8    | -179.4     | 25.7     | -37.3    | 34.3     | -19.3    | 118.2     | -34.6     | $\delta_L\beta_P(s^+)$       |
| cttADP-10 | -25.3      | -62.3       | -16.1    | 170.7      | -122.9      | 1.1      | -178.4     | 37.6     | -35.6    | 20.3     | 3.6      | 68.7      | -175.8    | $\delta_R\delta_R(g^+)$      |
| cttADP-11 | 6.2        | -124.4      | 38.2     | -173.8     | -82.3       | 72.1     | -178.0     | 36.5     | -40.4    | 28.1     | -5.3     | 71.7      | 59.0      | $?\gamma'(g^+)$              |
| cctADP-12 | 12.9       | -119.3      | 12.8     | 3.2        | -84.3       | 9.1      | 177.6      | 35.5     | -39.8    | 28.4     | -6.2     | 74.3      | 178.9     | $\delta_R\delta_R(g^+)$      |
| tctADP-13 | -168.3     | 118.8       | -167.8   | 36.8       | -120.1      | 1.5      | 169.9      | 38.4     | -40.1    | 26.3     | -2.1     | 105.0     | -21.0     | $\varepsilon\delta_R(s^+)$   |
| tttADP-14 | 175.4      | 131.5       | -48.7    | -172.0     | -90.9       | 75.7     | -175.5     | 29.2     | -36.2    | 28.7     | -10.7    | 147.5     | 174.6     | $\delta_L\gamma'(s^+)$       |
| cctADP-15 | 5.1        | -67.6       | -31.4    | -25.6      | -71.0       | 69.1     | -178.6     | 37.3     | -35.0    | 18.7     | 5.2      | 71.9      | -171.4    | $\alpha_R\gamma'(g^+)$       |
| tctADP-16 | -179.3     | 120.8       | -15.0    | -3.9       | -65.8       | -12.2    | 174.9      | 31.1     | -39.0    | 31.4     | -12.3    | 104.9     | -169.5    | $\delta_L\delta_R(s^+)$      |
| tctADP-17 | -172.8     | -75.2       | -37.0    | -27.2      | -42.1       | 140.5    | -176.2     | 28.8     | -38.1    | 32.6     | -15.1    | 64.5      | 176.2     | $\alpha_R\beta_P(g^+)$       |
| cctADP-18 | 15.2       | -133.9      | 45.4     | 31.4       | -103.8      | -14.1    | 171.2      | 33.3     | -40.6    | 31.9     | -11.3    | 63.9      | 58.6      | $?\delta_R(g^+)$             |
| cctADP-19 | -9.9       | -65.5       | -20.7    | -28.6      | -38.7       | 153.0    | 177.9      | 27.8     | -38.4    | 34.3     | -17.6    | 68.9      | 33.5      | $\delta_R\varepsilon''(g^+)$ |
| tctADP-20 | -178.9     | -66.5       | -38.0    | -27.7      | -33.8       | -60.0    | 175.0      | 20.3     | -33.0    | 32.8     | -21.2    | 76.4      | 13.0      | $\alpha_R\alpha_R(g^+)$      |
| tttADP-21 | -175.9     | 143.9       | -53.2    | 145.9      | -60.2       | 157.3    | -179.0     | 26.9     | -37.4    | 33.1     | -17.1    | 158.7     | 173.3     | $\delta_L\beta_P(t)$         |
| tctADP-22 | 170.5      | 134.4       | -68.4    | -20.8      | -49.2       | 150.7    | -176.3     | 30.8     | -38.0    | 30.2     | -11.2    | 165.4     | -9.8      | $?\beta_P(t)$                |
| cttADP-23 | -21.9      | -59.1       | -26.1    | 178.6      | -113.7      | -0.1     | 179.4      | 36.9     | -37.1    | 23.1     | 0.3      | 128.3     | 66.3      | $\delta_R\delta_R(s^+)$      |
| ttcADP-24 | 179.5      | -67.5       | -29.7    | 179.3      | -116.8      | 77.0     | -7.0       | 36.4     | -31.3    | 14.2     | 9.1      | 133.2     | 65.8      | $\delta_R\zeta(s^+)$         |
| tecADP-25 | -170.6     | -121.0      | 26.8     | 18.4       | -91.6       | -17.2    | 7.3        | 31.8     | -39.0    | 30.7     | -11.1    | 80.1      | 64.2      | $\delta_R\delta_R(g^+)$      |
| cttADP-26 | -19.1      | -114.4      | 174.6    | 177.8      | -110.3      | 15.8     | 175.1      | 37.2     | -36.5    | 21.7     | 1.9      | 69.2      | -66.1     | $\varepsilon''\delta_R(g^+)$ |
| cttADP-27 | -33.0      | -47.0       | -36.8    | 177.2      | -112.9      | -2.0     | -179.3     | 37.1     | -36.2    | 21.5     | 2.0      | 76.4      | 26.2      | $\alpha_R\delta_R(g^+)$      |
| cccADP-28 | 6.9        | 130.9       | -29.7    | -25.2      | -44.9       | 167.4    | -8.0       | 30.6     | -38.6    | 31.7     | -12.9    | 121.8     | 8.1       | $\delta_L\varepsilon''(s^+)$ |
| cctADP-29 | -29.9      | -114.0      | 164.1    | -32.6      | -48.4       | -25.4    | 177.8      | 30.9     | -37.6    | 29.2     | -10.2    | 57.3      | -45.1     | $\varepsilon''\delta_R(g^+)$ |
| cccADP-30 | -16.6      | 135.8       | -27.8    | -10.7      | -65.2       | -19.0    | 7.4        | 32.1     | -38.0    | 28.8     | -9.0     | 127.9     | 67.6      | $\delta_L\delta_R(s^+)$      |

**Table S9.** Dihedral angle values (in degrees) of all the optimized structures of Ac-azaAla-Pro-NHMe at the B3LYP-D3/6-311++G(d,p) level of theory in the gas phase.

|           | $\omega_0$ | $\varphi_1$ | $\psi_1$ | $\omega_1$ | $\varphi_2$ | $\psi_2$ | $\omega_2$ | $\chi_1$ | $\chi_2$ | $\chi_3$ | $\chi_4$ | Conformer               |
|-----------|------------|-------------|----------|------------|-------------|----------|------------|----------|----------|----------|----------|-------------------------|
| tttAAP-1  | -179.6     | -55.4       | -35.6    | 179.7      | -103.8      | 20.2     | 174.1      | 35.6     | -36.4    | 23.2     | -0.7     | $\alpha_R\delta_R$      |
| tttAAP-2  | 177.5      | -56.3       | -43.6    | 175.0      | -88.8       | 75.2     | -166.0     | 30.5     | -35.8    | 26.9     | -7.9     | $\alpha_R\gamma'$       |
| tttAAP-3  | 172.1      | 126.0       | -37.7    | -172.2     | -91.4       | 75.8     | -175.2     | 29.6     | -36.2    | 28.3     | -10.0    | $\delta_L\gamma'$       |
| tttAAP-4  | 171.0      | -123.9      | 167.8    | 179.1      | -88.1       | 77.0     | -174.8     | 25.1     | -37.2    | 34.4     | -19.4    | $\beta_S\gamma'$        |
| tctAAP-5  | 170.3      | 137.4       | -63.5    | -20.4      | -66.7       | 109.2    | -176.5     | 33.5     | -33.9    | 20.7     | 0.7      | $\gamma\varepsilon''$   |
| cttAAP-6  | -7.3       | 127.4       | -32.9    | -173.2     | -89.0       | 75.6     | -175.7     | 30.9     | -37.9    | 29.8     | -10.7    | $\delta_L\gamma'$       |
| cttAAP-7  | 7.2        | -128.6      | 39.3     | -175.2     | -81.1       | 71.8     | -177.3     | 36.4     | -40.4    | 28.2     | -5.4     | $?\gamma'$              |
| tctAAP-8  | -173.2     | -124.5      | 26.4     | 28.9       | -104.5      | -14.8    | 179.0      | 31.2     | -39.8    | 32.9     | -13.7    | $?\delta_R$             |
| tttAAP-9  | 166.6      | -77.0       | 156.7    | 175.1      | -124.3      | 12.7     | 174.8      | 37.2     | -36.8    | 22.8     | 0.6      | $\beta_P\beta$          |
| tctAAP-10 | 179.7      | -64.3       | -35.9    | -16.1      | -44.0       | -46.5    | 174.3      | 20.9     | -34.1    | 33.9     | -21.9    | $\alpha_R\alpha_R$      |
| cttAAP-11 | -28.4      | -50.7       | -33.8    | 177.5      | -115.5      | 0.5      | 179.5      | 36.9     | -36.2    | 21.8     | 1.6      | $\alpha_R\delta_R$      |
| tctAAP-12 | -171.2     | 128.6       | -172.0   | 32.5       | -118.6      | -4.7     | 178.2      | 36.7     | -39.8    | 27.7     | -4.7     | $\varepsilon\delta_R$   |
| cctAAP-13 | 16.6       | -137.2      | 45.6     | 33.8       | -107.0      | -13.9    | 170.8      | 32.5     | -40.4    | 32.7     | -12.6    | $\beta\delta_R$         |
| tttAAP-14 | -178.6     | 139.3       | -45.9    | 142.8      | -59.6       | 155.5    | -179.0     | 25.9     | -37.4    | 34.2     | -18.9    | $\delta_L\beta_P$       |
| cctAAP-15 | 5.4        | -126.7      | 30.4     | 7.5        | -83.5       | 161.8    | -172.7     | 34.5     | -39.2    | 28.6     | -6.9     | $?\beta_P$              |
| cttAAP-16 | -14.5      | -98.3       | 166.9    | -176.4     | -107.5      | 10.8     | 173.9      | 34.9     | -38.6    | 27.4     | -5.6     | $\varepsilon''\delta_R$ |
| cctAAP-17 | -15.9      | -110.3      | 163.9    | -29.8      | -62.0       | -12.9    | 179.7      | 35.1     | -37.2    | 24.5     | -2.2     | $\varepsilon''\delta_R$ |
| ttcAAP-18 | 176.6      | -63.2       | -34.6    | -180.0     | -117.4      | 78.3     | -7.6       | 35.8     | -31.3    | 14.9     | 8.0      | $\alpha_R\zeta$         |
| cctAAP-19 | 5.4        | -59.1       | -42.2    | -13.4      | -72.8       | 55.7     | -177.8     | 36.5     | -37.8    | 23.9     | -0.8     | $\alpha_R\gamma'$       |
| cccAAP-20 | -10.7      | 125.9       | -18.0    | -4.7       | -67.9       | 161.7    | -7.0       | 34.4     | -38.3    | 27.2     | -5.6     | $\delta_L\beta_P$       |
| tecAAP-21 | -171.8     | -124.0      | 26.6     | 23.5       | -97.5       | -16.0    | 3.1        | 31.5     | -38.9    | 31.2     | -11.8    | $?\delta_R$             |
| cccAAP-22 | -20.5      | 143.2       | -50.1    | -12.4      | -66.6       | -16.8    | 2.9        | 31.9     | -37.5    | 28.2     | -8.3     | $\delta_L\delta_R$      |

**Table S10.** Dihedral angle values (in degrees) of all the optimized structures of Ac-azaAsn-Pro-NHMe at the SMD/B3LYP-D3/6-311++G(d,p) level of theory in water.

|           | $\omega_0$ | $\varphi_1$ | $\psi_1$ | $\omega_1$ | $\varphi_2$ | $\psi_2$ | $\omega_2$ | $\chi_1$ | $\chi_2$ | $\chi_3$ | $\chi_4$ | $\chi_1'$ | $\chi_2'$ | Conformer                        |
|-----------|------------|-------------|----------|------------|-------------|----------|------------|----------|----------|----------|----------|-----------|-----------|----------------------------------|
| tttANP-1  | -178.8     | -57.9       | -36.7    | -180.0     | -95.3       | 6.7      | 177.0      | 34.7     | -36.8    | 24.5     | -2.6     | 60.4      | -159.6    | $\alpha_R\delta_R(g^+)$          |
| tctANP-2  | -169.7     | -130.4      | 34.2     | 20.1       | -98.0       | -12.8    | 175.3      | 33.1     | -39.3    | 30.1     | -9.6     | 72.3      | 169.9     | $?\delta_R(g^+)$                 |
| tttANP-3  | -179.1     | -63.4       | -38.2    | -174.2     | -91.9       | 70.1     | -175.1     | 31.6     | -36.4    | 26.7     | -7.1     | 59.4      | -153.5    | $\alpha_R\gamma'(g^+)$           |
| tttANP-4  | 179.3      | -61.4       | -31.5    | 179.9      | -94.7       | 5.5      | 177.4      | 34.9     | -36.1    | 23.3     | -1.1     | 125.3     | 57.8      | $\delta_R\delta_R(s^+)(\beta I)$ |
| ttANP-5   | 179.1      | 104.2       | -9.6     | -173.9     | -89.5       | 70.6     | -176.5     | 31.7     | -39.0    | 30.6     | -11.1    | 120.7     | -30.4     | $\delta_L\gamma'(s^+)$           |
| cttANP-6  | 5.7        | -122.5      | 30.9     | -174.8     | -83.5       | 59.2     | -179.9     | 37.0     | -41.6    | 29.5     | -6.5     | 75.7      | 167.8     | $?\gamma'(g^+)$                  |
| tctANP-7  | -173.0     | 91.6        | -165.4   | 26.6       | -108.3      | -15.7    | 179.1      | 34.8     | -39.2    | 28.3     | -6.5     | 84.4      | 1.3       | $\varepsilon\delta_R(g^+)$       |
| tttANP-8  | 178.8      | -58.6       | -36.4    | -179.9     | -96.6       | 7.9      | 176.9      | 34.9     | -36.3    | 23.5     | -1.4     | 73.8      | 20.7      | $\alpha_R\delta_R(g^+)$          |
| tttANP-9  | -179.2     | -120.1      | 173.4    | 178.0      | -96.6       | 13.6     | 175.1      | 34.4     | -37.5    | 26.0     | -4.4     | 74.6      | -150.5    | $\varepsilon''\delta_R(g^+)$     |
| cttANP-10 | 4.5        | -120.0      | 32.0     | -172.8     | -83.4       | 57.1     | 179.6      | 37.4     | -42.0    | 29.6     | -6.3     | 67.7      | 49.1      | $\delta_R\gamma'(g^+)$           |
| cttANP-11 | -0.4       | 80.5        | 22.8     | -169.1     | -82.8       | 54.1     | 178.5      | 37.8     | -42.8    | 30.6     | -7.1     | 86.2      | 62.4      | $\delta_L\beta(g^+)$             |
| tttANP-12 | -176.0     | 65.4        | 23.5     | -177.5     | -61.5       | 148.5    | 176.5      | 33.3     | -38.4    | 28.3     | -7.5     | 94.6      | -14.6     | $\delta_L\beta_P(s^+)$           |
| tctANP-13 | 174.7      | 128.0       | -67.5    | -20.2      | -58.0       | 148.0    | -177.6     | 31.7     | -36.1    | 26.2     | -6.4     | 85.4      | 14.9      | $\gamma\beta_P(s^+)$             |
| tctANP-14 | 178.7      | 132.9       | -30.0    | -22.9      | -51.2       | 161.4    | -176.3     | 33.1     | -37.8    | 27.8     | -7.2     | 132.6     | -13.9     | $\delta_L\beta_P(s^+)$           |
| tttANP-15 | 173.2      | -81.8       | 159.4    | 170.1      | -71.3       | 149.9    | 175.8      | 25.8     | -36.9    | 33.2     | -17.8    | 62.4      | 85.0      | $\beta_P\beta_P(g^+)$            |
| cctANP-16 | 7.5        | -96.2       | -3.8     | -15.5      | -58.4       | 174.3    | -179.4     | 34.8     | -38.6    | 27.3     | -5.5     | 92.6      | -0.8      | $\delta_R\varepsilon''(s^+)$     |
| cctANP-17 | 12.4       | -129.9      | 27.8     | 12.3       | -88.3       | -12.9    | 173.7      | 32.9     | -38.9    | 29.5     | -9.2     | 73.7      | 171.5     | $?\delta_R(g^+)$                 |
| ctANP-18  | -1.5       | -89.9       | -11.8    | 175.3      | -99.7       | -0.1     | 178.8      | 34.7     | -36.8    | 24.6     | -2.7     | 74.5      | -169.8    | $\delta_R\delta_R(g^+)$          |
| tcANP-19  | 179.5      | -64.0       | -38.9    | -14.6      | -54.2       | -32.0    | -179.7     | 28.3     | -36.1    | 29.6     | -12.3    | 73.2      | 20.9      | $\alpha_R\alpha_R(g^+)$          |
| ctANP-20  | -10.6      | -90.5       | 169.2    | 177.4      | -95.1       | 13.2     | 175.0      | 33.2     | -38.2    | 28.1     | -7.4     | 74.1      | -144.4    | $\varepsilon''\delta_R(g^+)$     |
| ccANP-21  | 5.4        | -80.2       | -26.4    | -40.8      | -68.1       | 84.9     | -174.2     | 31.8     | -15.9    | -6.3     | 27.8     | 62.9      | -163.8    | $\delta_R\gamma'(g^+)$           |
| ccANP-22  | 11.7       | -132.1      | 34.1     | 21.7       | -96.0       | -14.9    | 173.8      | 32.9     | -39.5    | 30.5     | -10.2    | 63.8      | 52.8      | $\beta\delta_R(g^+)$             |
| cttANP-23 | -3.2       | -79.5       | -20.9    | -178.5     | -94.9       | -1.3     | 179.0      | 33.9     | -37.1    | 25.8     | -4.5     | 113.1     | 55.6      | $\delta_R\delta_R(s^+)$          |
| tctANP-24 | -178.2     | -64.9       | -38.4    | -22.8      | -50.1       | 147.5    | -179.3     | 30.2     | -36.7    | 28.9     | -10.3    | 62.6      | -159.1    | $\alpha_R\beta_P(g^+)$           |
| tctANP-25 | 176.6      | 126.3       | -25.5    | -11.0      | -63.0       | -15.2    | 173.3      | 32.8     | -37.3    | 27.1     | -6.6     | 134.3     | 159.1     | $\delta_L\delta_R(s^+)$          |
| cttANP-26 | -3.2       | -76.4       | -25.1    | 177.1      | -98.0       | 1.3      | 178.2      | 34.2     | -36.3    | 24.2     | -2.6     | 85.1      | 12.8      | $\delta_R\delta_R(g^+)$          |
| tttANP-27 | 176.7      | 123.9       | -32.9    | -172.1     | -92.5       | 72.4     | -176.0     | 30.3     | -37.1    | 29.0     | -10.4    | 144.9     | 153.8     | $\delta_L\gamma'(s^+)$           |
| ttcANP-28 | 178.3      | -74.4       | -24.1    | -179.0     | -119.1      | 68.8     | 0.3        | 37.5     | -33.4    | 16.5     | 7.3      | 117.9     | 53.9      | $\delta_R\zeta(s^+)$             |
| tecANP-29 | -167.8     | -127.6      | 33.0     | 16.5       | -92.0       | -18.4    | 7.3        | 32.5     | -38.5    | 29.3     | -9.1     | 66.3      | 44.2      | $\beta\delta_R(g^+)$             |
| tttANP-30 | 176.6      | 126.5       | -39.3    | -175.8     | -89.7       | 147.5    | 175.5      | 30.4     | -35.5    | 26.5     | -7.5     | 149.6     | 153.0     | $\delta_L\beta_S(s^+)$           |
| cctANP-31 | 3.0        | -117.0      | 163.5    | -27.8      | -62.4       | -18.7    | -178.9     | 34.3     | -35.7    | 22.8     | -1.0     | 60.9      | -160.7    | $\beta_S\delta_R(g^+)$           |
| cccANP-32 | -4.6       | 138.1       | -41.0    | -23.8      | -55.6       | 168.1    | -9.3       | 34.7     | -37.2    | 25.2     | -3.2     | 143.2     | -10.8     | $\delta_L\varepsilon''(s^+)$     |
| cccANP-33 | -8.4       | 133.4       | -37.3    | -12.5      | -67.6       | -18.0    | 0.1        | 32.4     | -36.4    | 25.9     | -5.6     | 147.1     | 151.4     | $\delta_L\delta_R(s^+)$          |

**Table S11.** Dihedral angle values (in degrees) of all the optimized structures of Ac-azaAsp-Pro-NHMe (ADP) at the SMD/B3LYP-D3/6-311++G(d,p) level of theory in water.

|           | $\omega_0$ | $\phi_1$ | $\psi_1$ | $\omega_1$ | $\phi_2$ | $\psi_2$ | $\omega_2$ | $\chi_1$ | $\chi_2$ | $\chi_3$ | $\chi_4$ | $\chi_1'$ | $\chi_2'$ | Conformer                    |
|-----------|------------|----------|----------|------------|----------|----------|------------|----------|----------|----------|----------|-----------|-----------|------------------------------|
| tttADP-1  | -179.3     | -57.8    | -36.7    | 180.0      | -94.4    | 5.9      | 176.9      | 34.6     | -36.7    | 24.4     | -2.5     | 64.9      | -172.0    | $\alpha_R\delta_R(g^+)$      |
| tttADP-2  | -179.1     | -64.0    | -37.5    | -172.9     | -92.3    | 66.7     | -176.6     | 32.1     | -36.9    | 26.9     | -7.0     | 65.9      | -172.1    | $\alpha_R\gamma'(g^+)$       |
| tctADP-3  | -170.1     | -130.4   | 34.8     | 19.8       | -97.9    | -13.0    | 175.5      | 33.2     | -39.3    | 29.8     | -9.2     | 71.4      | 174.2     | $?\delta_R(g^+)$             |
| tctADP-4  | -172.5     | 106.6    | -161.8   | 26.0       | -104.1   | 151.9    | -178.0     | 33.8     | -38.9    | 28.7     | -7.6     | 87.5      | -0.8      | $\varepsilon\beta_S(g^+)$    |
| cttADP-5  | 4.7        | -122.7   | 31.9     | -174.6     | -83.3    | 58.8     | 179.9      | 37.1     | -41.8    | 29.6     | -6.6     | 74.0      | 174.3     | $?\gamma'(g^+)$              |
| tttADP-6  | -179.9     | -62.2    | -30.0    | 179.5      | -92.2    | 3.7      | 177.7      | 34.9     | -36.1    | 23.1     | -1.0     | 136.4     | 59.6      | $\delta_R\delta_R(s^+)$      |
| tttADP-7  | -176.7     | 77.2     | 24.2     | -172.5     | -82.3    | 58.1     | 179.4      | 37.1     | -42.6    | 30.8     | -7.8     | 104.8     | -31.1     | $\delta_L\alpha_R(s^+)$      |
| tttADP-8  | 172.0      | -88.4    | 177.8    | -177.7     | -94.2    | 5.0      | 176.7      | 35.0     | -36.3    | 23.5     | -1.4     | 88.4      | -179.9    | $\varepsilon''\delta_R(g^+)$ |
| tttADP-9  | -174.8     | 72.0     | 23.3     | -177.6     | -61.7    | 148.6    | 176.5      | 33.2     | -38.3    | 28.2     | -7.6     | 102.8     | -28.9     | $\delta_L\beta_P(s^+)$       |
| cttADP-10 | -2.6       | -82.9    | -19.0    | 177.5      | -100.8   | 0.5      | 178.7      | 34.8     | -36.6    | 24.1     | -2.1     | 72.6      | -174.4    | $\delta_R\delta_R(g^+)$      |
| cttADP-11 | 4.6        | -126.4   | 42.6     | -170.9     | -83.1    | 56.2     | 178.9      | 37.5     | -42.1    | 29.7     | -6.3     | 71.9      | 56.4      | $?\gamma'(g^+)$              |
| cctADP-12 | 12.0       | -129.5   | 28.1     | 11.8       | -88.0    | -12.6    | 174.0      | 33.0     | -38.9    | 29.3     | -8.8     | 72.9      | 175.8     | $?\delta_R(g^+)$             |
| tctADP-13 | -173.1     | 109.0    | -164.6   | 28.9       | -108.9   | -13.1    | 177.1      | 35.2     | -39.5    | 28.4     | -6.4     | 93.2      | -9.0      | $\varepsilon\delta_R(s^+)$   |
| tttADP-14 | 177.5      | 121.8    | -29.0    | -172.5     | -92.4    | 72.1     | -176.2     | 30.4     | -37.3    | 29.2     | -10.5    | 137.4     | 165.9     | $\delta_L\gamma'(s^+)$       |
| cctADP-15 | 4.8        | -79.1    | -27.5    | -39.3      | -68.5    | 87.0     | -173.8     | 32.0     | -16.9    | -4.9     | 26.4     | 67.5      | -172.6    | $\delta_R\gamma'(g^+)$       |
| tctADP-16 | 176.2      | 123.8    | -20.0    | -13.5      | -62.0    | -16.4    | 173.6      | 32.7     | -37.3    | 27.1     | -6.7     | 120.0     | -179.4    | $\delta_L\delta_R(s^+)$      |
| tctADP-17 | -178.9     | -64.4    | -39.0    | -22.9      | -49.7    | 147.6    | -179.0     | 30.0     | -36.8    | 29.1     | -10.7    | 67.3      | -172.3    | $\alpha_R\beta_P(g^+)$       |
| cctADP-18 | 10.5       | -134.5   | 40.7     | 19.2       | -94.5    | -15.9    | 174.3      | 33.3     | -39.1    | 29.3     | -8.5     | 70.5      | 58.4      | $?\delta_R(g^+)$             |
| cctADP-19 | 4.2        | -86.9    | -16.5    | -22.9      | -53.0    | 177.4    | -179.2     | 34.4     | -38.8    | 28.1     | -6.7     | 79.7      | 18.6      | $\delta_R\varepsilon''(g^+)$ |
| tctADP-20 | 178.4      | -61.5    | -46.6    | -22.3      | -40.6    | -57.7    | 176.0      | 23.8     | -33.4    | 29.6     | -15.4    | 70.3      | 19.2      | $\alpha_R\alpha_R(g^+)$      |
| tttADP-21 | 177.4      | 126.1    | -39.0    | -175.5     | -89.4    | 147.6    | 175.5      | 30.4     | -35.5    | 26.5     | -7.5     | 146.8     | 164.4     | $\delta_L\beta_P(s^+)$       |
| tctADP-22 | 176.3      | 129.4    | -28.9    | -26.2      | -51.0    | 175.3    | -176.1     | 35.2     | -38.5    | 26.8     | -4.8     | 125.3     | -7.1      | $\delta_L\beta_P(s^+)$       |
| cttADP-23 | 4.2        | -126.1   | 38.9     | -175.0     | -67.9    | -23.7    | -178.8     | 32.3     | -38.9    | 29.7     | -9.6     | 72.9      | 57.2      | $?\delta_R(g^+)$             |
| ttcADP-24 | 178.4      | -72.9    | -24.7    | -178.3     | -118.1   | 68.9     | 0.7        | 37.7     | -33.3    | 16.0     | 8.0      | 130.8     | 58.9      | $\delta_R\zeta(s^+)$         |
| tecADP-25 | -168.6     | -126.9   | 35.8     | 15.0       | -90.8    | -18.4    | 7.4        | 32.9     | -38.7    | 29.0     | -8.6     | 76.9      | 56.4      | $?\delta_R(g^+)$             |
| cttADP-26 | -10.8      | -89.1    | 168.5    | 177.2      | -97.8    | 3.6      | 177.9      | 33.7     | -37.2    | 26.2     | -5.0     | 74.1      | -179.5    | $\varepsilon''\delta_R(g^+)$ |
| cttADP-27 | -3.2       | -72.6    | -30.3    | 179.4      | -96.4    | 1.2      | 178.2      | 34.1     | -36.4    | 24.3     | -2.8     | 80.1      | 18.9      | $\delta_R\delta_R(g^+)(BI)$  |
| cccADP-28 | -3.5       | 138.6    | -41.7    | -24.6      | -51.1    | 169.0    | -9.6       | 33.5     | -37.9    | 27.4     | -6.4     | 142.7     | -10.6     | $\delta_L\varepsilon''(s^+)$ |
| cctADP-29 | 2.7        | -117.8   | 162.2    | -27.1      | -63.4    | -17.8    | -179.0     | 34.3     | -35.8    | 22.9     | -1.2     | 64.6      | -174.9    | $\beta_S\delta_R(g^+)$       |
| cccADP-30 | -8.3       | 90.7     | 26.5     | 20.3       | -92.2    | -23.9    | 3.7        | 32.4     | -37.1    | 27.0     | -6.7     | 94.3      | 53.7      | $\delta_L\delta_R(s^+)$      |

**Table S12.** Dihedral angle values (in degrees) of all the optimized structures of Ac-azaAla-Pro-NHMe at the SMD/B3LYP-D3/6-311++G(d,p) level of theory in water.

|           | $\omega_0$ | $\varphi_1$ | $\psi_1$ | $\omega_1$ | $\varphi_2$ | $\psi_2$ | $\omega_2$ | $\chi_1$ | $\chi_2$ | $\chi_3$ | $\chi_4$ | Conformer                   |
|-----------|------------|-------------|----------|------------|-------------|----------|------------|----------|----------|----------|----------|-----------------------------|
| tttAAP-1  | 179.2      | -56.1       | -37.4    | -178.8     | -94.5       | 6.2      | 176.9      | 34.5     | -36.8    | 24.6     | -2.8     | $\alpha_R\delta_R(\beta I)$ |
| tttAAP-2  | 179.3      | -62.0       | -38.4    | -172.5     | -91.4       | 69.3     | -175.6     | 31.5     | -36.6    | 27.1     | -7.5     | $\alpha_R\gamma'$           |
| tttAAP-3  | 175.6      | 128.3       | -39.2    | -172.7     | -93.5       | 70.8     | -175.9     | 30.8     | -36.7    | 28.0     | -8.9     | $\delta_L\gamma'$           |
| tttAAP-4  | 173.6      | -79.3       | 163.7    | -176.6     | -88.2       | 73.0     | -175.8     | 28.9     | -38.1    | 32.0     | -14.5    | $\beta_P\gamma'$            |
| tctAAP-5  | 171.7      | 135.7       | -48.0    | -27.6      | -65.3       | 115.4    | -176.2     | 32.7     | -26.8    | 10.1     | 11.3     | $?\beta_S$                  |
| cttAAP-6  | -5.3       | 128.4       | -33.4    | -172.7     | -91.8       | 69.9     | -176.4     | 31.2     | -37.9    | 29.4     | -10.2    | $\delta_L\gamma'$           |
| cttAAP-7  | 4.9        | -125.5      | 35.2     | -174.3     | -82.8       | 57.6     | 179.7      | 37.2     | -41.9    | 29.8     | -6.6     | $\beta\gamma'$              |
| tctAAP-8  | -170.3     | -131.5      | 36.1     | 20.0       | -98.7       | -13.2    | 175.8      | 33.2     | -39.2    | 30.0     | -9.4     | $?\delta_R$                 |
| tttAAP-9  | 173.4      | -80.4       | 164.5    | 176.6      | -85.8       | -6.5     | 179.6      | 29.8     | -37.9    | 31.0     | -12.7    | $\beta_P\delta_R$           |
| tctAAP-10 | -178.9     | -64.6       | -38.1    | -10.6      | -58.7       | -26.7    | -178.7     | 29.6     | -36.7    | 29.2     | -11.0    | $\alpha_R\delta_R$          |
| cttAAP-11 | -2.4       | -70.5       | -31.1    | -178.6     | -96.5       | 1.4      | 178.4      | 34.0     | -36.6    | 25.0     | -3.5     | $\delta_R\delta_R$          |
| tctAAP-12 | 178.1      | 127.1       | -174.4   | 21.5       | -106.6      | -7.5     | 177.4      | 36.0     | -39.4    | 27.4     | -4.8     | $\varepsilon\delta_R$       |
| cctAAP-13 | 14.5       | -136.8      | 37.8     | 21.8       | -97.4       | -15.2    | 174.2      | 32.4     | -39.3    | 30.7     | -10.7    | $?\delta_R$                 |
| tttAAP-14 | 176.3      | 128.6       | -40.8    | -175.3     | -88.7       | 145.0    | 176.0      | 29.6     | -35.5    | 27.4     | -9.0     | $\delta_L\beta_S$           |
| cctAAP-15 | 15.5       | -139.6      | 39.0     | 22.8       | -96.9       | 153.5    | -178.9     | 31.8     | -39.3    | 31.5     | -11.9    | $?\beta_P$                  |
| cttAAP-16 | -6.8       | -92.4       | 162.6    | 177.7      | -91.7       | -0.5     | 179.1      | 31.8     | -38.2    | 29.6     | -9.9     | $\varepsilon''\delta_R$     |
| cctAAP-17 | 5.7        | -126.3      | 159.8    | -19.3      | -66.0       | -19.3    | -178.3     | 32.9     | -36.3    | 25.1     | -4.3     | $\beta_S\delta_R$           |
| ttcAAP-18 | 178.0      | -67.1       | -32.7    | -177.7     | -118.6      | 72.9     | 0.0        | 36.9     | -31.8    | 14.6     | 8.8      | $\alpha_R\zeta$             |
| cctAAP-19 | 2.4        | -68.6       | -33.7    | -13.2      | -57.4       | -28.3    | -179.1     | 28.7     | -36.6    | 29.9     | -12.3    | $\alpha_R\delta_R$          |
| cccAAP-20 | -8.8       | 130.5       | -23.0    | -12.8      | -63.6       | 163.9    | -4.4       | 34.7     | -37.1    | 25.0     | -3.1     | $\delta_L\beta_P$           |
| tccAAP-21 | -168.2     | -130.6      | 36.2     | 14.8       | -92.5       | -18.4    | 7.0        | 32.5     | -38.5    | 29.3     | -9.1     | $?\delta_R$                 |
| cccAAP-22 | -9.7       | 136.3       | -43.2    | -11.4      | -67.8       | -16.7    | 0.4        | 32.5     | -36.7    | 26.4     | -6.0     | $\delta_L\delta_R$          |



**Table S13:** NBO orbital interactions, E(2) value, corresponding to hydrogen bond for the model **ANP** at the B3LYP/ method.

|           | Donor $\longrightarrow$ Acceptor         | cycle           | E(2) (Kcal/mol) | $\Sigma E_{HB}$ (Kcal/mol) |
|-----------|------------------------------------------|-----------------|-----------------|----------------------------|
| tttANP-1  | $\pi_{CO} \longrightarrow \sigma^*_{NH}$ | C <sub>10</sub> | 1.43            | 4.22                       |
|           | $n_O \longrightarrow \sigma^*_{NH}$      |                 | 1.98            |                            |
|           | $n'_O \longrightarrow \sigma^*_{NH}$     |                 | 0.81            |                            |
|           | $n_O \longrightarrow \sigma^*_{NH}$      | C <sub>6</sub>  | 0.53            | 2.13                       |
|           | $n'_O \longrightarrow \sigma^*_{NH}$     |                 | 1.60            |                            |
| tctANP-2  | $n_O \longrightarrow \sigma^*_{NH}$      | C <sub>6</sub>  | 0.53            | 2.10                       |
|           | $n'_O \longrightarrow \sigma^*_{NH}$     |                 | 1.57            |                            |
|           | $n_N \longrightarrow \sigma^*_{NH}$      | C <sub>5</sub>  | 1.15            | 1.15                       |
| tttANP-3  | $\pi_{CO} \longrightarrow \sigma^*_{NH}$ | C <sub>7</sub>  | 1.02            | 3.42                       |
|           | $n_O \longrightarrow \sigma^*_{NH}$      |                 | 1.11            |                            |
|           | $n'_O \longrightarrow \sigma^*_{NH}$     |                 | 1.29            |                            |
|           | $n'_O \longrightarrow \sigma^*_{NH}$     | C <sub>6</sub>  | 1.00            | 1.00                       |
| tttANP-4  | $\pi_{CO} \longrightarrow \sigma^*_{NH}$ | C <sub>10</sub> | 1.27            | 3.55                       |
|           | $n_O \longrightarrow \sigma^*_{NH}$      |                 | 1.64            |                            |
|           | $n'_O \longrightarrow \sigma^*_{NH}$     |                 | 0.64            |                            |
|           | $\pi_{CO} \longrightarrow \sigma^*_{NH}$ | C <sub>7</sub>  | 1.09            | 3.80                       |
|           | $n_O \longrightarrow \sigma^*_{NH}$      |                 | 1.32            |                            |
|           | $n'_O \longrightarrow \sigma^*_{NH}$     |                 | 1.39            |                            |
|           | $n_N \longrightarrow \sigma^*_{NH}$      | C <sub>5</sub>  | 0.51            | 0.51                       |
| tttANP-5  | $n_O \longrightarrow \sigma^*_{NH}$      | C <sub>7</sub>  | 1.41            | 3.18                       |
|           | $n'_O \longrightarrow \sigma^*_{NH}$     |                 | 1.77            |                            |
|           | $n_O \longrightarrow \sigma^*_{NH}$      | C <sub>8</sub>  | 2.07            | 6.47                       |
|           | $n'_O \longrightarrow \sigma^*_{NH}$     |                 | 4.40            |                            |
| cttANP-6  | $\pi_{CO} \longrightarrow \sigma^*_{NH}$ | C <sub>7</sub>  | 0.73            | 7.73                       |
|           | $n_O \longrightarrow \sigma^*_{NH}$      |                 | 3.01            |                            |
|           | $n'_O \longrightarrow \sigma^*_{NH}$     |                 | 3.99            |                            |
|           | $n'_O \longrightarrow \sigma^*_{NH}$     | C <sub>6</sub>  | 1.01            | 1.01                       |
| tctANP-7  | $\pi_{CO} \longrightarrow \sigma^*_{NH}$ | C <sub>8</sub>  | 0.90            | 9.34                       |
|           | $n_O \longrightarrow \sigma^*_{NH}$      |                 | 2.56            |                            |
|           | $n'_O \longrightarrow \sigma^*_{NH}$     |                 | 5.88            |                            |
|           | $n_N \longrightarrow \sigma^*_{NH}$      | C <sub>5</sub>  | 1.08            | 1.08                       |
| tttANP-8  | $\pi_{CO} \longrightarrow \sigma^*_{NH}$ | C <sub>10</sub> | 1.27            | 3.69                       |
|           | $n_O \longrightarrow \sigma^*_{NH}$      |                 | 1.75            |                            |
|           | $n'_O \longrightarrow \sigma^*_{NH}$     |                 | 0.67            |                            |
| tttANP-9  | $n_O \longrightarrow \sigma^*_{NH}$      | C <sub>10</sub> | 2.74            | 5.76                       |
|           | $n'_O \longrightarrow \sigma^*_{NH}$     |                 | 3.02            |                            |
|           | $n_O \longrightarrow \sigma^*_{NH}$      | C <sub>5</sub>  | 0.69            | 3.34                       |
|           | $n'_O \longrightarrow \sigma^*_{NH}$     |                 | 2.65            |                            |
| cttANP-10 | $\pi_{CO} \longrightarrow \sigma^*_{NH}$ | C <sub>7</sub>  | 0.89            | 8.52                       |
|           | $n_O \longrightarrow \sigma^*_{NH}$      |                 | 3.33            |                            |
|           | $n'_O \longrightarrow \sigma^*_{NH}$     |                 | 4.30            |                            |
|           | $\pi_{CO} \longrightarrow \sigma^*_{NH}$ | C <sub>7</sub>  | 1.22            | 4.43                       |
|           | $n_O \longrightarrow \sigma^*_{NH}$      |                 | 1.33            |                            |
|           | $n'_O \longrightarrow \sigma^*_{NH}$     |                 | 1.88            |                            |
| cttANP-11 | $\pi_{CO} \longrightarrow \sigma^*_{NH}$ | C <sub>7</sub>  | 0.96            | 5.05                       |
|           | $n_O \longrightarrow \sigma^*_{NH}$      |                 | 2.01            |                            |
|           | $n'_O \longrightarrow \sigma^*_{NH}$     |                 | 2.08            |                            |
|           | $\pi_{CO} \longrightarrow \sigma^*_{NH}$ | C <sub>7</sub>  | 0.94            | 4.77                       |
|           | $n_O \longrightarrow \sigma^*_{NH}$      |                 | 1.92            |                            |
|           | $n'_O \longrightarrow \sigma^*_{NH}$     |                 | 1.91            |                            |
| tttANP-12 | $n_O \longrightarrow \sigma^*_{NH}$      | C <sub>8</sub>  | 1.75            | 3.63                       |
|           | $n'_O \longrightarrow \sigma^*_{NH}$     |                 | 1.88            |                            |
|           | $n_O \longrightarrow \sigma^*_{NH}$      | C <sub>8</sub>  | 2.67            | 8.57                       |
|           | $n'_O \longrightarrow \sigma^*_{NH}$     |                 | 5.90            |                            |
| tctANP-13 | $\pi_{CO} \longrightarrow \sigma^*_{NH}$ | C <sub>8</sub>  | 0.81            | 3.50                       |

|                                      |                                          |          |      |      |
|--------------------------------------|------------------------------------------|----------|------|------|
|                                      | $n_O \longrightarrow \sigma^*_{NH}$      |          | 0.63 |      |
|                                      | $n'_O \longrightarrow \sigma^*_{NH}$     |          | 2.06 |      |
|                                      | $n_O \longrightarrow \sigma^*_{NH}$      | $C_{10}$ | 1.94 | 3.08 |
|                                      | $n'_O \longrightarrow \sigma^*_{NH}$     |          | 1.14 |      |
| tctANP-14                            | $\pi_{CO} \longrightarrow \sigma^*_{NH}$ | $C_{10}$ | 3.73 | 4.61 |
|                                      | $n_O \longrightarrow \sigma^*_{NH}$      |          | 0.88 |      |
|                                      | $n_O \longrightarrow \sigma^*_{NH}$      | $C_{10}$ | 3.49 | 5.34 |
| $n'_O \longrightarrow \sigma^*_{NH}$ | 1.85                                     |          |      |      |
| tttANP-15                            | $\pi_{CO} \longrightarrow \sigma^*_{NH}$ | $C_{10}$ | 1.37 | 5.46 |
|                                      | $n_O \longrightarrow \sigma^*_{NH}$      |          | 3.08 |      |
|                                      | $n'_O \longrightarrow \sigma^*_{NH}$     |          | 1.01 |      |
| cctANP-16                            | $\pi_{CO} \longrightarrow \sigma^*_{NH}$ | $C_{10}$ | 1.95 | 4.22 |
|                                      | $n_O \longrightarrow \sigma^*_{NH}$      |          | 2.27 |      |
| cctANP-17                            | $n_O \longrightarrow \sigma^*_{NH}$      | $C_{10}$ | 1.00 | 1.94 |
|                                      | $n'_O \longrightarrow \sigma^*_{NH}$     |          | 0.94 |      |
| cttANP-18                            | $n_N \longrightarrow \sigma^*_{NH}$      | $C_5$    | 1.56 | 1.56 |
| tctANP-19                            | $\pi_{CO} \longrightarrow \sigma^*_{NH}$ | $C_{10}$ | 2.02 | 2.62 |
|                                      | $n_O \longrightarrow \sigma^*_{NH}$      |          | 0.60 |      |
|                                      | $n'_O \longrightarrow \sigma^*_{NH}$     | $C_{10}$ | 1.01 | 1.01 |
| cttANP-20                            | $n_O \longrightarrow \sigma^*_{NH}$      | $C_{10}$ | 2.56 | 5.50 |
|                                      | $n'_O \longrightarrow \sigma^*_{NH}$     |          | 2.94 |      |
| cctANP-21                            | $n_O \longrightarrow \sigma^*_{NH}$      | $C_{10}$ | 2.25 | 5.68 |
|                                      | $n'_O \longrightarrow \sigma^*_{NH}$     |          | 3.43 |      |
| cctANP-22                            | $\pi_{CO} \longrightarrow \sigma^*_{NH}$ | $C_7$    | 1.41 | 4.96 |
|                                      | $n_O \longrightarrow \sigma^*_{NH}$      |          | 1.28 |      |
|                                      | $n'_O \longrightarrow \sigma^*_{NH}$     |          | 2.27 |      |
| cttANP-23                            | $\pi_{CO} \longrightarrow \sigma^*_{NH}$ | $C_7$    | 0.75 | 2.69 |
|                                      | $n_O \longrightarrow \sigma^*_{NH}$      |          | 1.00 |      |
|                                      | $n'_O \longrightarrow \sigma^*_{NH}$     |          | 0.94 |      |
|                                      | $n_N \longrightarrow \sigma^*_{NH}$      | $C_5$    | 1.30 | 1.30 |
| tctANP-24                            | $n_O \longrightarrow \sigma^*_{NH}$      | $C_6$    | 0.58 | 2.41 |
|                                      | $n'_O \longrightarrow \sigma^*_{NH}$     |          | 1.83 |      |
| tctANP-25                            | $n_O \longrightarrow \sigma^*_{NH}$      | $C_{10}$ | 2.78 | 6.94 |
|                                      | $n'_O \longrightarrow \sigma^*_{NH}$     |          | 4.16 |      |
| cttANP-26                            | $n_N \longrightarrow \sigma^*_{NH}$      | $C_5$    | 1.17 | 1.17 |
| tttANP-27                            | $\pi_{CO} \longrightarrow \sigma^*_{NH}$ | $C_7$    | 0.84 | 4.03 |
|                                      | $n_O \longrightarrow \sigma^*_{NH}$      |          | 1.33 |      |
|                                      | $n'_O \longrightarrow \sigma^*_{NH}$     |          | 1.86 |      |
| tteANP-28                            | $\pi_{CO} \longrightarrow \sigma^*_{NH}$ | $C_7$    | 1.17 | 3.61 |
|                                      | $n_O \longrightarrow \sigma^*_{NH}$      |          | 1.21 |      |
|                                      | $n'_O \longrightarrow \sigma^*_{NH}$     |          | 1.23 |      |
| tccANP-29                            | $n_O \longrightarrow \sigma^*_{NH}$      | $C_7$    | 0.75 | 2.14 |
|                                      | $n'_O \longrightarrow \sigma^*_{NH}$     |          | 1.39 |      |
| tttANP-30                            | $n_O \longrightarrow \sigma^*_{NH}$      | $C_8$    | 1.48 | 3.17 |
|                                      | $n'_O \longrightarrow \sigma^*_{NH}$     |          | 1.69 |      |
| cctANP-31                            | $n'_O \longrightarrow \sigma^*_{NH}$     | $C_5$    | 0.95 | 0.95 |
| cccANP-32                            | $\pi_{CO} \longrightarrow \sigma^*_{NH}$ | $C_{10}$ | 1.37 | 3.18 |
|                                      | $n_O \longrightarrow \sigma^*_{NH}$      |          | 1.81 |      |
| cccANP-33                            | No interaction                           |          |      |      |

**Table S14:** NBO orbital interactions, E(2) values, corresponding to hydrogen bond for ADP with B3LYP method.

|           | Donor $\longrightarrow$ Acceptor         | Cycle           | E(2) (Kcal/mol) | $\Sigma E_{HB}$ (Kcal/mol) |
|-----------|------------------------------------------|-----------------|-----------------|----------------------------|
| tttADP-1  | $\pi_{CO} \longrightarrow \sigma_{NH}^*$ | C <sub>10</sub> | 1.37            | 3.71                       |
|           | $n_O \longrightarrow \sigma_{NH}^*$      |                 | 1.70            |                            |
|           | $n'_O \longrightarrow \sigma_{NH}^*$     |                 | 0.64            |                            |
|           | $n'_O \longrightarrow \sigma_{NH}^*$     | C <sub>6</sub>  | 0.59            | 0.59                       |
| tttADP-2  | $\pi_{CO} \longrightarrow \sigma_{NH}^*$ | C <sub>7</sub>  | 0.93            | 3.21                       |
|           | $n_O \longrightarrow \sigma_{NH}^*$      |                 | 1.04            |                            |
|           | $n'_O \longrightarrow \sigma_{NH}^*$     |                 | 1.24            |                            |
| tctADP-3  | $n_N \longrightarrow \sigma_{NH}^*$      | C <sub>5</sub>  | 1.20            | 1.20                       |
|           | $n'_O \longrightarrow \sigma_{NH}^*$     | C <sub>6</sub>  | 0.67            | 0.67                       |
| tctADP-4  | $\pi_{CO} \longrightarrow \sigma_{OH}^*$ | C <sub>8</sub>  | 0.84            | 22.59                      |
|           | $n_O \longrightarrow \sigma_{OH}^*$      |                 | 5.24            |                            |
|           | $n'_O \longrightarrow \sigma_{OH}^*$     |                 | 16.51           |                            |
| cttADP-5  | $\pi_{CO} \longrightarrow \sigma_{NH}^*$ | C <sub>7</sub>  | 0.60            | 7.75                       |
|           | $n_O \longrightarrow \sigma_{NH}^*$      |                 | 3.04            |                            |
|           | $n'_O \longrightarrow \sigma_{NH}^*$     |                 | 4.11            |                            |
| tttADP-6  | $\pi_{CO} \longrightarrow \sigma_{NH}^*$ | C <sub>10</sub> | 1.21            | 3.40                       |
|           | $n_O \longrightarrow \sigma_{NH}^*$      |                 | 1.60            |                            |
|           | $n'_O \longrightarrow \sigma_{NH}^*$     |                 | 0.59            |                            |
|           | $\pi_{CO} \longrightarrow \sigma_{OH}^*$ | C <sub>7</sub>  | 3.44            | 15.67                      |
|           | $n_O \longrightarrow \sigma_{OH}^*$      |                 | 5.05            |                            |
|           | $n'_O \longrightarrow \sigma_{OH}^*$     |                 | 7.18            |                            |
| tttADP-7  | $n_O \longrightarrow \sigma_{OH}^*$      | C <sub>8</sub>  | 3.99            | 14.06                      |
|           | $n'_O \longrightarrow \sigma_{OH}^*$     |                 | 10.07           |                            |
|           | $n_O \longrightarrow \sigma_{NH}^*$      | C <sub>7</sub>  | 1.24            | 2.82                       |
|           | $n'_O \longrightarrow \sigma_{NH}^*$     |                 | 1.58            |                            |
| tttADP-8  | $\pi_{CO} \longrightarrow \sigma_{NH}^*$ | C <sub>10</sub> | 0.68            | 3.34                       |
|           | $n_O \longrightarrow \sigma_{NH}^*$      |                 | 1.59            |                            |
|           | $n'_O \longrightarrow \sigma_{NH}^*$     |                 | 1.07            |                            |
|           | $n_O \longrightarrow \sigma_{NH}^*$      | C <sub>5</sub>  | 0.56            | 2.76                       |
|           | $n'_O \longrightarrow \sigma_{NH}^*$     |                 | 2.20            |                            |
| tttADP-9  | $n_O \longrightarrow \sigma_{NH}^*$      | C <sub>8</sub>  | 2.46            | 5.15                       |
|           | $n'_O \longrightarrow \sigma_{NH}^*$     |                 | 2.69            |                            |
|           | $n_O \longrightarrow \sigma_{OH}^*$      | C <sub>8</sub>  | 5.29            | 19.71                      |
|           | $n'_O \longrightarrow \sigma_{OH}^*$     |                 | 14.42           |                            |
| cctADP-10 | $n_N \longrightarrow \sigma_{NH}^*$      | C <sub>5</sub>  | 1.49            | 1.49                       |
| cttADP-11 | $n_O \longrightarrow \sigma_{NH}^*$      | C <sub>7</sub>  | 3.59            | 6.39                       |
|           | $n'_O \longrightarrow \sigma_{NH}^*$     |                 | 2.80            |                            |
|           | $n_O \longrightarrow \sigma_{OH}^*$      | C <sub>7</sub>  | 5.02            | 14.90                      |
|           | $n'_O \longrightarrow \sigma_{OH}^*$     |                 | 9.88            |                            |
| cctADP-12 | No interaction                           |                 |                 |                            |
| tctADP-13 | $\pi_{CO} \longrightarrow \sigma_{OH}^*$ | C <sub>8</sub>  | 0.94            | 20.46                      |
|           | $n_O \longrightarrow \sigma_{OH}^*$      |                 | 4.99            |                            |
|           | $n'_O \longrightarrow \sigma_{OH}^*$     |                 | 14.53           |                            |
| tttADP-14 | $\pi_{CO} \longrightarrow \sigma_{NH}^*$ | C <sub>7</sub>  | 0.72            | 3.81                       |
|           | $n_O \longrightarrow \sigma_{NH}^*$      |                 | 1.27            |                            |
|           | $n'_O \longrightarrow \sigma_{NH}^*$     |                 | 1.82            |                            |
| cctADP-15 | $n_O \longrightarrow \sigma_{NH}^*$      | C <sub>10</sub> | 1.18            | 3.58                       |
|           | $n'_O \longrightarrow \sigma_{NH}^*$     |                 | 2.40            |                            |
| tctADP-16 | $n_O \longrightarrow \sigma_{NH}^*$      | C <sub>10</sub> | 1.97            | 5.08                       |
|           | $n'_O \longrightarrow \sigma_{NH}^*$     |                 | 3.11            |                            |
| tctADP-17 | $n'_O \longrightarrow \sigma_{NH}^*$     | C <sub>6</sub>  | 0.80            | 0.80                       |
| cctADP-18 | $\pi_{CO} \longrightarrow \sigma_{OH}^*$ | C <sub>7</sub>  | 2.15            | 17.93                      |
|           | $n_O \longrightarrow \sigma_{OH}^*$      |                 | 4.65            |                            |
|           | $n'_O \longrightarrow \sigma_{OH}^*$     |                 | 11.13           |                            |
| cctADP-19 | $\pi_{CO} \longrightarrow \sigma_{OH}^*$ | C <sub>10</sub> | 3.32            | 7.37                       |
|           | $n_O \longrightarrow \sigma_{OH}^*$      |                 | 4.05            |                            |
| tctADP-20 | $\pi_{CO} \longrightarrow \sigma_{OH}^*$ | C <sub>10</sub> | 2.49            | 3.27                       |

|           |                                             |          |       |       |
|-----------|---------------------------------------------|----------|-------|-------|
|           | $n_O \longrightarrow \sigma_{OH}^*$         |          | 0.78  |       |
| tttADP-21 | $n_O \longrightarrow \sigma_{NH}^*$         | $C_8$    | 1.59  | 3.37  |
|           | $n'_O \longrightarrow \sigma_{NH}^*$        |          | 1.78  |       |
|           |                                             |          |       |       |
| tctADP-22 | $\pi_{CO} \longrightarrow \sigma_{OH}^*$    | $C_{10}$ | 5.98  | 10.20 |
|           | $n_O \longrightarrow \sigma_{OH}^*$         |          | 4.22  |       |
|           | $n_O \longrightarrow \sigma_{NH}^*$         | $C_{10}$ | 1.04  | 1.04  |
| cttADP-23 | $\pi_{CO} \longrightarrow \sigma_{OH}^*$    | $C_7$    | 3.66  | 13.16 |
|           | $n_O \longrightarrow \sigma_{OH}^*$         |          | 4.26  |       |
|           | $n'_O \longrightarrow \sigma_{OH}^*$        |          | 5.24  |       |
|           | $n_N \longrightarrow \sigma_{NH}^*$         | $C_5$    | 1.11  | 1.11  |
| ttcADP-24 | $\pi_{CO} \longrightarrow \sigma_{OH}^*$    | $C_7$    | 4.02  | 15.26 |
|           | $n_O \longrightarrow \sigma_{OH}^*$         |          | 4.77  |       |
|           | $n'_O \longrightarrow \sigma_{OH}^*$        |          | 6.47  |       |
| tecADP-25 | $\sigma_{CO} \longrightarrow \sigma_{OH}^*$ | $C_7$    | 0.71  | 18.12 |
|           | $\pi_{CO} \longrightarrow \sigma_{OH}^*$    |          | 1.23  |       |
|           | $n_O \longrightarrow \sigma_{OH}^*$         |          | 4.74  |       |
|           | $n'_O \longrightarrow \sigma_{OH}^*$        |          | 11.44 |       |
| cttADP-26 | $n'_O \longrightarrow \sigma_{NH}^*$        | $C_5$    | 1.84  | 1.84  |
|           | $n_N \longrightarrow \sigma_{OH}^*$         | $C_6$    | 4.49  | 4.49  |
| cttADP-27 | $n_N \longrightarrow \sigma_{OH}^*$         | $C_5$    | 2.49  | 2.49  |
|           | $n_N \longrightarrow \sigma_{NH}^*$         | $C_5$    | 1.04  | 1.04  |
| cccADP-28 | $\pi_{CO} \longrightarrow \sigma_{OH}^*$    | $C_{10}$ | 1.82  | 5.05  |
|           | $n_O \longrightarrow \sigma_{OH}^*$         |          | 2.72  |       |
|           | $n'_O \longrightarrow \sigma_{OH}^*$        |          | 0.51  |       |
| cctADP-29 | $n_N \longrightarrow \sigma_{OH}^*$         | $C_6$    | 9.75  | 9.75  |
| cccADP-30 | $\pi_{CO} \longrightarrow \sigma_{OH}^*$    | $C_7$    | 4.25  | 16.76 |
|           | $n_O \longrightarrow \sigma_{OH}^*$         |          | 5.59  |       |
|           | $n'_O \longrightarrow \sigma_{OH}^*$        |          | 6.92  |       |

**Table S15.** NBO orbital interactions, E(2) values, corresponding to hydrogen bond for AAP at the B3LYP/6-311++G(d,p) level of theory.

| Conf.     | Donor $\longrightarrow$ Acceptor         | Cycle           | E(2) (kcal/mol) | $\Sigma E_{HB}$ (Kcal/mol) |
|-----------|------------------------------------------|-----------------|-----------------|----------------------------|
| tttAAP-1  | $\pi_{CO} \longrightarrow \sigma_{NH}^*$ | C <sub>10</sub> | 1.41            | 3.62                       |
|           | $n_O \longrightarrow \sigma_{NH}^*$      |                 | 1.68            |                            |
|           | $n'_O \longrightarrow \sigma_{NH}^*$     |                 | 0.53            |                            |
| tttAAP-2  | $\pi_{CO} \longrightarrow \sigma_{NH}^*$ | C <sub>7</sub>  | 1.05            | 3.36                       |
|           | $n_O \longrightarrow \sigma_{NH}^*$      |                 | 1.02            |                            |
|           | $n'_O \longrightarrow \sigma_{NH}^*$     |                 | 1.29            |                            |
| tttAAP-3  | $\pi_{CO} \longrightarrow \sigma_{NH}^*$ | C <sub>7</sub>  | 0.71            | 3.81                       |
|           | $n_O \longrightarrow \sigma_{NH}^*$      |                 | 1.35            |                            |
|           | $n'_O \longrightarrow \sigma_{NH}^*$     |                 | 1.75            |                            |
| tttAAP-4  | $\pi_{CO} \longrightarrow \sigma_{NH}^*$ | C <sub>7</sub>  | 0.88            | 3.26                       |
|           | $n_O \longrightarrow \sigma_{NH}^*$      |                 | 1.09            |                            |
|           | $n'_O \longrightarrow \sigma_{NH}^*$     |                 | 1.29            |                            |
|           | $n'_O \longrightarrow \sigma_{NH}^*$     | C <sub>5</sub>  | 1.31            | 1.31                       |
| tctAAP-5  | $\pi_{CO} \longrightarrow \sigma_{NH}^*$ | C <sub>10</sub> | 0.64            | 8.68                       |
|           | $n_O \longrightarrow \sigma_{NH}^*$      |                 | 3.70            |                            |
|           | $n'_O \longrightarrow \sigma_{NH}^*$     |                 | 4.34            |                            |
| cttAAP-6  | $\pi_{CO} \longrightarrow \sigma_{NH}^*$ | C <sub>7</sub>  | 0.65            | 4.19                       |
|           | $n_O \longrightarrow \sigma_{NH}^*$      |                 | 1.62            |                            |
|           | $n'_O \longrightarrow \sigma_{NH}^*$     |                 | 1.92            |                            |
| cttAAP-7  | $\pi_{CO} \longrightarrow \sigma_{NH}^*$ | C <sub>7</sub>  | 0.83            | 9.35                       |
|           | $n_O \longrightarrow \sigma_{NH}^*$      |                 | 3.47            |                            |
|           | $n'_O \longrightarrow \sigma_{NH}^*$     |                 | 5.05            |                            |
| tctAAP-8  | $n_N \longrightarrow \sigma_{NH}^*$      | C <sub>5</sub>  | 1.34            | 1.34                       |
| tttAAP-9  | $n_N \longrightarrow \sigma_{NH}^*$      | C <sub>5</sub>  | 1.34            | 1.34                       |
|           | $n'_O \longrightarrow \sigma_{NH}^*$     | C <sub>5</sub>  | 1.58            | 1.58                       |
| tctAAP-10 | No interaction                           |                 |                 |                            |
| cttAAP-11 | $n_N \longrightarrow \sigma_{NH}^*$      | C <sub>5</sub>  | 1.35            | 1.35                       |
| tctAAP-12 | $n_N \longrightarrow \sigma_{NH}^*$      | C <sub>5</sub>  | 1.47            | 1.47                       |
| cctAAP-13 | No interaction                           |                 |                 |                            |
| tttAAP-14 | $n_O \longrightarrow \sigma_{NH}^*$      | C <sub>8</sub>  | 1.10            | 2.38                       |
|           | $n'_O \longrightarrow \sigma_{NH}^*$     |                 | 1.28            |                            |
| cctAAP-15 | $\pi_{CO} \longrightarrow \sigma_{NH}^*$ | C <sub>10</sub> | 1.07            | 2.47                       |
|           | $n_O \longrightarrow \sigma_{NH}^*$      |                 | 0.61            |                            |
|           | $n'_O \longrightarrow \sigma_{NH}^*$     |                 | 0.79            |                            |
| cttAAP-16 | $n_N \longrightarrow \sigma_{NH}^*$      | C <sub>5</sub>  | 1.05            | 1.05                       |
| cctAAP-17 | No interaction                           |                 |                 |                            |
| tctAAP-18 | No interaction                           |                 |                 |                            |
| cctAAP-19 | $n_N \longrightarrow \sigma_{NH}^*$      | C <sub>7</sub>  | 3.56            | 3.56                       |
| cccAAP-20 | No interaction                           |                 |                 |                            |
| tccAAP-21 | No interaction                           |                 |                 |                            |
| cccAAP-22 | No interaction                           |                 |                 |                            |

**Table S16:** NBO orbital interactions, E(2) values, corresponding to hydrogen bond for ANP with B3LYP-D<sub>3</sub> method.

|           | Donor $\longrightarrow$ Acceptor         | Cycle           | E(2) (Kcal/mol) | $\Sigma E_{HB}$ (Kcal/mol) |
|-----------|------------------------------------------|-----------------|-----------------|----------------------------|
| tttANP-1  | $\pi_{CO} \longrightarrow \sigma^*_{NH}$ | C <sub>10</sub> | 1.95            | 5.39                       |
|           | $n_O \longrightarrow \sigma^*_{NH}$      |                 | 2.60            |                            |
|           | $n'_O \longrightarrow \sigma^*_{NH}$     |                 | 0.84            |                            |
|           | $n_N \longrightarrow \sigma^*_{NH}$      | C <sub>5</sub>  | 0.55            | 0.55                       |
|           | $n'_O \longrightarrow \sigma^*_{NH}$     | C <sub>6</sub>  | 1.26            | 1.26                       |
| tctANP-2  | $n_N \longrightarrow \sigma^*_{NH}$      | C <sub>5</sub>  | 1.19            | 1.19                       |
|           | $n_O \longrightarrow \sigma^*_{NH}$      | C <sub>6</sub>  | 0.51            | 1.97                       |
|           | $n'_O \longrightarrow \sigma^*_{NH}$     |                 | 1.46            |                            |
| tttANP-3  | $\pi_{CO} \longrightarrow \sigma^*_{NH}$ | C <sub>7</sub>  | 1.40            | 2.73                       |
|           | $n_O \longrightarrow \sigma^*_{NH}$      |                 | 0.68            |                            |
|           | $n'_O \longrightarrow \sigma^*_{NH}$     |                 | 0.65            |                            |
|           | $n'_O \longrightarrow \sigma^*_{NH}$     | C <sub>6</sub>  | 0.96            | 0.96                       |
| tttANP-4  | $\pi_{CO} \longrightarrow \sigma^*_{NH}$ | C <sub>10</sub> | 1.77            | 4.68                       |
|           | $n_O \longrightarrow \sigma^*_{NH}$      |                 | 2.27            |                            |
|           | $n'_O \longrightarrow \sigma^*_{NH}$     |                 | 0.64            |                            |
|           | $\pi_{CO} \longrightarrow \sigma^*_{NH}$ | C <sub>7</sub>  | 1.18            | 4.03                       |
|           | $n_O \longrightarrow \sigma^*_{NH}$      |                 | 1.40            |                            |
|           | $n'_O \longrightarrow \sigma^*_{NH}$     |                 | 1.45            |                            |
| tttANP-5  | $n_O \longrightarrow \sigma^*_{NH}$      | C <sub>8</sub>  | 2.18            | 9.79                       |
|           | $n'_O \longrightarrow \sigma^*_{NH}$     |                 | 4.61            |                            |
|           | $n_O \longrightarrow \sigma^*_{NH}$      | C <sub>7</sub>  | 1.41            | 3.19                       |
|           | $n'_O \longrightarrow \sigma^*_{NH}$     |                 | 1.78            |                            |
| cttANP-6  | $\pi_{CO} \longrightarrow \sigma^*_{NH}$ | C <sub>7</sub>  | 0.90            | 8.14                       |
|           | $n_O \longrightarrow \sigma^*_{NH}$      |                 | 3.13            |                            |
|           | $n'_O \longrightarrow \sigma^*_{NH}$     |                 | 4.11            |                            |
|           | $n'_O \longrightarrow \sigma^*_{NH}$     | C <sub>6</sub>  | 0.89            | 0.89                       |
| tctANP-7  | $\pi_{CO} \longrightarrow \sigma^*_{NH}$ | C <sub>8</sub>  | 0.71            | 9.98                       |
|           | $n_O \longrightarrow \sigma^*_{NH}$      |                 | 2.98            |                            |
|           | $n'_O \longrightarrow \sigma^*_{NH}$     |                 | 6.29            |                            |
| tttANP-8  | $\pi_{CO} \longrightarrow \sigma^*_{NH}$ | C <sub>10</sub> | 1.75            | 4.94                       |
|           | $n_O \longrightarrow \sigma^*_{NH}$      |                 | 2.44            |                            |
|           | $n'_O \longrightarrow \sigma^*_{NH}$     |                 | 0.75            |                            |
| tttANP-9  | $n_O \longrightarrow \sigma^*_{NH}$      | C <sub>10</sub> | 3.28            | 7.59                       |
|           | $n'_O \longrightarrow \sigma^*_{NH}$     |                 | 4.31            |                            |
| cttANP-10 | $\pi_{CO} \longrightarrow \sigma^*_{NH}$ | C <sub>7</sub>  | 1.28            | 4.25                       |
|           | $n_O \longrightarrow \sigma^*_{NH}$      |                 | 1.17            |                            |
|           | $n'_O \longrightarrow \sigma^*_{NH}$     |                 | 1.80            |                            |
|           | $\pi_{CO} \longrightarrow \sigma^*_{NH}$ | C <sub>7</sub>  | 0.95            | 8.62                       |
|           | $n_O \longrightarrow \sigma^*_{NH}$      |                 | 3.34            |                            |
|           | $n'_O \longrightarrow \sigma^*_{NH}$     |                 | 4.33            |                            |
| cttANP-11 | $\pi_{CO} \longrightarrow \sigma^*_{NH}$ | C <sub>7</sub>  | 0.83            | 9.11                       |
|           | $n_O \longrightarrow \sigma^*_{NH}$      |                 | 3.69            |                            |
|           | $n'_O \longrightarrow \sigma^*_{NH}$     |                 | 4.59            |                            |
|           | $n_O \longrightarrow \sigma^*_{NH}$      | C <sub>7</sub>  | 2.48            | 5.58                       |
|           | $n'_O \longrightarrow \sigma^*_{NH}$     |                 | 3.10            |                            |
| tttANP-12 | $n_O \longrightarrow \sigma^*_{NH}$      | C <sub>8</sub>  | 2.72            | 8.86                       |
|           | $n'_O \longrightarrow \sigma^*_{NH}$     |                 | 6.14            |                            |
|           | $n_O \longrightarrow \sigma^*_{NH}$      | C <sub>8</sub>  | 3.20            | 6.25                       |
|           | $n'_O \longrightarrow \sigma^*_{NH}$     |                 | 3.05            |                            |
| tctANP-13 | $\pi_{CO} \longrightarrow \sigma^*_{NH}$ | C <sub>8</sub>  | 1.06            | 3.83                       |
|           | $n_O \longrightarrow \sigma^*_{NH}$      |                 | 0.70            |                            |
|           | $n'_O \longrightarrow \sigma^*_{NH}$     |                 | 2.07            |                            |
| tctANP-14 | $\pi_{CO} \longrightarrow \sigma^*_{NH}$ | C <sub>10</sub> | 0.62            | 8.65                       |
|           | $n_O \longrightarrow \sigma^*_{NH}$      |                 | 4.78            |                            |
|           | $n'_O \longrightarrow \sigma^*_{NH}$     |                 | 3.25            |                            |

|           |                                                                                                                                                                       |                 |                      |      |
|-----------|-----------------------------------------------------------------------------------------------------------------------------------------------------------------------|-----------------|----------------------|------|
|           | $\pi_{\text{CO}} \longrightarrow \sigma_{\text{NH}}^*$<br>$n_{\text{O}} \longrightarrow \sigma_{\text{NH}}^*$                                                         | $\text{C}_{10}$ | 4.11<br>0.81         | 4.92 |
| tttANP-15 | $\pi_{\text{CO}} \longrightarrow \sigma_{\text{NH}}^*$<br>$n_{\text{O}} \longrightarrow \sigma_{\text{NH}}^*$<br>$n'_{\text{O}} \longrightarrow \sigma_{\text{NH}}^*$ | $\text{C}_{10}$ | 1.93<br>3.61<br>0.86 | 6.40 |
|           | $\sigma_{\text{CO}} \longrightarrow \sigma_{\text{NH}}^*$                                                                                                             | $\text{C}_6$    | 1.09                 | 1.09 |
|           | $\pi_{\text{CO}} \longrightarrow \sigma_{\text{NH}}^*$<br>$n_{\text{O}} \longrightarrow \sigma_{\text{NH}}^*$                                                         | $\text{C}_{10}$ | 1.80<br>1.25         | 3.05 |
|           | $n_{\text{O}} \longrightarrow \sigma_{\text{NH}}^*$<br>$n'_{\text{O}} \longrightarrow \sigma_{\text{NH}}^*$                                                           | $\text{C}_{10}$ | 1.00<br>0.88         | 1.88 |
| cctANP-16 | $\pi_{\text{CO}} \longrightarrow \sigma_{\text{NH}}^*$<br>$n_{\text{O}} \longrightarrow \sigma_{\text{NH}}^*$                                                         | $\text{C}_{10}$ | 1.80<br>1.25         | 3.05 |
| cctANP-17 | $n_{\text{O}} \longrightarrow \sigma_{\text{NH}}^*$<br>$n'_{\text{O}} \longrightarrow \sigma_{\text{NH}}^*$                                                           | $\text{C}_{10}$ | 1.00<br>0.88         | 1.88 |
| cttANP-18 | $n_{\text{N}} \longrightarrow \sigma_{\text{NH}}^*$                                                                                                                   | $\text{C}_5$    | 1.22                 | 1.22 |
| tctANP-19 | $\pi_{\text{CO}} \longrightarrow \sigma_{\text{NH}}^*$<br>$n_{\text{O}} \longrightarrow \sigma_{\text{NH}}^*$<br>$n'_{\text{O}} \longrightarrow \sigma_{\text{NH}}^*$ | $\text{C}_{10}$ | 2.34<br>0.69<br>0.54 | 3.57 |
|           | $\pi_{\text{CO}} \longrightarrow \sigma_{\text{NH}}^*$<br>$n_{\text{O}} \longrightarrow \sigma_{\text{NH}}^*$<br>$n'_{\text{O}} \longrightarrow \sigma_{\text{NH}}^*$ | $\text{C}_{10}$ | 0.78<br>2.73<br>3.26 | 6.77 |
|           | $n'_{\text{O}} \longrightarrow \sigma_{\text{NH}}^*$                                                                                                                  | $\text{C}_5$    | 0.57                 | 0.57 |
| cctANP-21 | $n_{\text{O}} \longrightarrow \sigma_{\text{NH}}^*$<br>$n'_{\text{O}} \longrightarrow \sigma_{\text{NH}}^*$                                                           | $\text{C}_{10}$ | 2.08<br>3.83         | 5.91 |
|           | $\pi_{\text{CO}} \longrightarrow \sigma_{\text{NH}}^*$<br>$n_{\text{O}} \longrightarrow \sigma_{\text{NH}}^*$<br>$n'_{\text{O}} \longrightarrow \sigma_{\text{NH}}^*$ | $\text{C}_7$    | 1.41<br>1.12<br>2.23 | 4.76 |
| cttANP-23 | $\pi_{\text{CO}} \longrightarrow \sigma_{\text{NH}}^*$<br>$n_{\text{O}} \longrightarrow \sigma_{\text{NH}}^*$<br>$n'_{\text{O}} \longrightarrow \sigma_{\text{NH}}^*$ | $\text{C}_7$    | 1.31<br>1.03<br>0.96 | 3.30 |
|           | $\sigma_{\text{N}} \longrightarrow \sigma_{\text{NH}}^*$                                                                                                              | $\text{C}_5$    | 0.92                 | 0.92 |
|           | $n_{\text{O}} \longrightarrow \sigma_{\text{NH}}^*$<br>$n'_{\text{O}} \longrightarrow \sigma_{\text{NH}}^*$                                                           | $\text{C}_6$    | 0.51<br>1.53         | 3.04 |
| tctANP-24 | $n_{\text{O}} \longrightarrow \sigma_{\text{NH}}^*$<br>$n'_{\text{O}} \longrightarrow \sigma_{\text{NH}}^*$                                                           | $\text{C}_{10}$ | 2.15<br>2.10         | 4.25 |
| cttANP-25 | $n_{\text{O}} \longrightarrow \sigma_{\text{NH}}^*$<br>$n'_{\text{O}} \longrightarrow \sigma_{\text{NH}}^*$                                                           | $\text{C}_{10}$ | 2.15<br>2.10         | 4.25 |
| cttANP-26 | $n_{\text{N}} \longrightarrow \sigma_{\text{NH}}^*$                                                                                                                   | $\text{C}_5$    | 1.28                 | 1.28 |
| tttANP-27 | $\pi_{\text{CO}} \longrightarrow \sigma_{\text{NH}}^*$<br>$n_{\text{O}} \longrightarrow \sigma_{\text{NH}}^*$<br>$n'_{\text{O}} \longrightarrow \sigma_{\text{NH}}^*$ | $\text{C}_7$    | 0.85<br>1.22<br>1.78 | 3.85 |
|           | $\pi_{\text{CO}} \longrightarrow \sigma_{\text{NH}}^*$<br>$n_{\text{O}} \longrightarrow \sigma_{\text{NH}}^*$<br>$n'_{\text{O}} \longrightarrow \sigma_{\text{NH}}^*$ | $\text{C}_7$    | 1.30<br>1.32<br>1.35 | 3.97 |
|           | $n_{\text{O}} \longrightarrow \sigma_{\text{NH}}^*$<br>$n'_{\text{O}} \longrightarrow \sigma_{\text{NH}}^*$                                                           | $\text{C}_7$    | 0.61<br>0.69         | 1.78 |
| tccANP-29 | $n_{\text{O}} \longrightarrow \sigma_{\text{NH}}^*$<br>$n'_{\text{O}} \longrightarrow \sigma_{\text{NH}}^*$                                                           | $\text{C}_7$    | 0.61<br>0.69         | 1.78 |
| tttANP-30 | $n_{\text{O}} \longrightarrow \sigma_{\text{NH}}^*$<br>$n'_{\text{O}} \longrightarrow \sigma_{\text{NH}}^*$                                                           | $\text{C}_8$    | 2.76<br>2.81         | 5.57 |
| cctANP-31 | No interaction                                                                                                                                                        |                 |                      |      |
| cccANP-32 | $\pi_{\text{CO}} \longrightarrow \sigma_{\text{NH}}^*$<br>$n_{\text{O}} \longrightarrow \sigma_{\text{NH}}^*$                                                         | $\text{C}_{10}$ | 1.25<br>2.27         | 3.52 |
| cccANP-33 | No interaction                                                                                                                                                        |                 |                      |      |

**Table S17:** NBO orbital interactions, E(2) values, corresponding to hydrogen bond for ADP with B3LYP-D<sub>3</sub> method.

|           | Donor $\longrightarrow$ Acceptor         | Cycle           | E(2) (Kcal/mol) | $\Sigma E_{HB}$ (Kcal/mol) |
|-----------|------------------------------------------|-----------------|-----------------|----------------------------|
| tttADP-1  | $\pi_{CO} \longrightarrow \sigma_{NH}^*$ | C <sub>10</sub> | 1.91            | 4.97                       |
|           | $n_O \longrightarrow \sigma_{NH}^*$      |                 | 2.37            |                            |
|           | $n'_O \longrightarrow \sigma_{NH}^*$     |                 | 0.69            |                            |
|           | $n'_O \longrightarrow \sigma_{NH}^*$     | C <sub>6</sub>  | 0.54            | 0.54                       |
|           | $n_N \longrightarrow \sigma_{NH}^*$      | C <sub>5</sub>  | 0.51            | 0.51                       |
| tttADP-2  | $\pi_{CO} \longrightarrow \sigma_{NH}^*$ | C <sub>7</sub>  | 1.29            | 2.59                       |
|           | $n_O \longrightarrow \sigma_{NH}^*$      |                 | 0.65            |                            |
|           | $n'_O \longrightarrow \sigma_{NH}^*$     |                 | 0.65            |                            |
| tctADP-3  | $n_N \longrightarrow \sigma_{NH}^*$      | C <sub>5</sub>  | 1.22            | 1.22                       |
| tctADP-4  | $\pi_{CO} \longrightarrow \sigma_{OH}^*$ | C <sub>8</sub>  | 0.85            | 21.92                      |
|           | $n_O \longrightarrow \sigma_{OH}^*$      |                 | 5.14            |                            |
|           | $n'_O \longrightarrow \sigma_{OH}^*$     |                 | 15.93           |                            |
| cttADP-5  | $\pi_{CO} \longrightarrow \sigma_{NH}^*$ | C <sub>7</sub>  | 0.74            | 8.05                       |
|           | $n_O \longrightarrow \sigma_{NH}^*$      |                 | 3.12            |                            |
|           | $n'_O \longrightarrow \sigma_{NH}^*$     |                 | 4.19            |                            |
| tttADP-6  | $\pi_{CO} \longrightarrow \sigma_{NH}^*$ | C <sub>10</sub> | 1.66            | 4.46                       |
|           | $n_O \longrightarrow \sigma_{NH}^*$      |                 | 2.20            |                            |
|           | $n'_O \longrightarrow \sigma_{NH}^*$     |                 | 0.60            |                            |
|           | $\pi_{CO} \longrightarrow \sigma_{OH}^*$ | C <sub>7</sub>  | 3.47            | 15.74                      |
|           | $n_O \longrightarrow \sigma_{OH}^*$      |                 | 5.02            |                            |
|           | $n'_O \longrightarrow \sigma_{OH}^*$     |                 | 7.25            |                            |
| tttADP-7  | $n_O \longrightarrow \sigma_{NH}^*$      | C <sub>7</sub>  | 1.27            | 2.90                       |
|           | $n'_O \longrightarrow \sigma_{NH}^*$     |                 | 1.63            |                            |
|           | $n_O \longrightarrow \sigma_{OH}^*$      | C <sub>8</sub>  | 3.99            | 14.14                      |
|           | $n'_O \longrightarrow \sigma_{OH}^*$     |                 | 10.15           |                            |
| tttADP-8  | $\pi_{CO} \longrightarrow \sigma_{NH}^*$ | C <sub>10</sub> | 0.99            | 4.26                       |
|           | $n_O \longrightarrow \sigma_{NH}^*$      |                 | 2.09            |                            |
|           | $n'_O \longrightarrow \sigma_{NH}^*$     |                 | 1.18            |                            |
|           | $n_O \longrightarrow \sigma_{NH}^*$      | C <sub>5</sub>  | 0.52            | 2.56                       |
|           | $n'_O \longrightarrow \sigma_{NH}^*$     |                 | 2.04            |                            |
| tttADP-9  | $n_O \longrightarrow \sigma_{NH}^*$      | C <sub>8</sub>  | 3.89            | 7.86                       |
|           | $n'_O \longrightarrow \sigma_{NH}^*$     |                 | 3.97            |                            |
|           | $n_O \longrightarrow \sigma_{OH}^*$      | C <sub>8</sub>  | 5.12            | 19.41                      |
|           | $n'_O \longrightarrow \sigma_{OH}^*$     |                 | 14.29           |                            |
| cttADP-10 | $n_N \longrightarrow \sigma_{NH}^*$      | C <sub>5</sub>  | 1.13            | 1.13                       |
| cttADP-11 | $n_O \longrightarrow \sigma_{NH}^*$      | C <sub>7</sub>  | 3.58            | 6.41                       |
|           | $n'_O \longrightarrow \sigma_{NH}^*$     |                 | 2.83            |                            |
|           | $n_O \longrightarrow \sigma_{OH}^*$      | C <sub>7</sub>  | 4.70            | 14.09                      |
|           | $n'_O \longrightarrow \sigma_{OH}^*$     |                 | 9.39            |                            |
| cctADP-12 | No interaction                           |                 |                 |                            |
| tctADP-13 | $\pi_{CO} \longrightarrow \sigma_{OH}^*$ | C <sub>8</sub>  | 0.58            | 22.26                      |
|           | $n_O \longrightarrow \sigma_{OH}^*$      |                 | 5.70            |                            |
|           | $n'_O \longrightarrow \sigma_{OH}^*$     |                 | 15.98           |                            |
|           | $n'_O \longrightarrow \sigma_{NH}^*$     | C <sub>5</sub>  | 1.00            | 1.00                       |
| tttADP-14 | $\pi_{CO} \longrightarrow \sigma_{NH}^*$ | C <sub>7</sub>  | 0.72            | 3.63                       |
|           | $n_O \longrightarrow \sigma_{NH}^*$      |                 | 1.17            |                            |
|           | $n'_O \longrightarrow \sigma_{NH}^*$     |                 | 1.74            |                            |
| cctADP-15 | $n_O \longrightarrow \sigma_{NH}^*$      | C <sub>10</sub> | 1.05            | 3.46                       |
|           | $n'_O \longrightarrow \sigma_{NH}^*$     |                 | 2.41            |                            |
| tctADP-16 | $n_O \longrightarrow \sigma_{NH}^*$      | C <sub>10</sub> | 1.08            | 2.47                       |
|           | $n'_O \longrightarrow \sigma_{NH}^*$     |                 | 1.39            |                            |
| tctADP-17 | $n'_O \longrightarrow \sigma_{NH}^*$     | C <sub>6</sub>  | 0.68            | 0.68                       |
| cctADP-18 | $\pi_{CO} \longrightarrow \sigma_{OH}^*$ | C <sub>7</sub>  | 2.01            | 17.43                      |
|           | $n_O \longrightarrow \sigma_{OH}^*$      |                 | 4.31            |                            |
|           | $n'_O \longrightarrow \sigma_{OH}^*$     |                 | 11.11           |                            |



|                  |                                                        |                 |       |       |
|------------------|--------------------------------------------------------|-----------------|-------|-------|
| <b>cctADP-19</b> | $\pi_{\text{CO}} \longrightarrow \sigma_{\text{OH}}^*$ | $\text{C}_{10}$ | 4.44  | 7.39  |
|                  | $n_{\text{O}} \longrightarrow \sigma_{\text{OH}}^*$    |                 | 2.95  |       |
| <b>tctADP-20</b> | $\pi_{\text{CO}} \longrightarrow \sigma_{\text{NH}}^*$ | $\text{C}_8$    | 0.52  | 2.48  |
|                  | $n_{\text{O}} \longrightarrow \sigma_{\text{NH}}^*$    |                 | 0.60  |       |
|                  | $n'_{\text{O}} \longrightarrow \sigma_{\text{NH}}^*$   |                 | 1.36  |       |
|                  | $\pi_{\text{CO}} \longrightarrow \sigma_{\text{OH}}^*$ | $\text{C}_{10}$ | 2.59  | 3.73  |
|                  | $n_{\text{O}} \longrightarrow \sigma_{\text{OH}}^*$    |                 | 0.64  |       |
|                  | $n'_{\text{O}} \longrightarrow \sigma_{\text{OH}}^*$   |                 | 0.50  |       |
| <b>tttADP-21</b> | $n_{\text{N}} \longrightarrow \sigma_{\text{OH}}^*$    | $\text{C}_5$    | 1.53  | 1.53  |
|                  | $n_{\text{O}} \longrightarrow \sigma_{\text{NH}}^*$    |                 | 2.91  |       |
|                  | $n'_{\text{O}} \longrightarrow \sigma_{\text{NH}}^*$   |                 | 2.89  |       |
| <b>tctADP-22</b> | $\pi_{\text{CO}} \longrightarrow \sigma_{\text{NH}}^*$ | $\text{C}_{10}$ | 0.59  | 2.26  |
|                  | $n_{\text{O}} \longrightarrow \sigma_{\text{NH}}^*$    |                 | 1.67  |       |
|                  | $\pi_{\text{CO}} \longrightarrow \sigma_{\text{OH}}^*$ | $\text{C}_{10}$ | 6.65  | 11.08 |
|                  | $n_{\text{O}} \longrightarrow \sigma_{\text{OH}}^*$    |                 | 4.43  |       |
| <b>cctADP-23</b> | $\pi_{\text{CO}} \longrightarrow \sigma_{\text{OH}}^*$ | $\text{C}_7$    | 3.74  | 12.64 |
|                  | $n_{\text{O}} \longrightarrow \sigma_{\text{OH}}^*$    |                 | 3.90  |       |
|                  | $n'_{\text{O}} \longrightarrow \sigma_{\text{OH}}^*$   |                 | 5.00  |       |
|                  | $n_{\text{N}} \longrightarrow \sigma_{\text{NH}}^*$    |                 | 1.07  |       |
| <b>ttcADP-24</b> | $\pi_{\text{CO}} \longrightarrow \sigma_{\text{OH}}^*$ | $\text{C}_7$    | 3.80  | 15.29 |
|                  | $n_{\text{O}} \longrightarrow \sigma_{\text{OH}}^*$    |                 | 4.73  |       |
|                  | $n'_{\text{O}} \longrightarrow \sigma_{\text{OH}}^*$   |                 | 6.76  |       |
|                  | $n_{\text{N}} \longrightarrow \sigma_{\text{NH}}^*$    |                 | 1.07  |       |
| <b>tccADP-25</b> | $\pi_{\text{CO}} \longrightarrow \sigma_{\text{OH}}^*$ | $\text{C}_7$    | 0.57  | 15.83 |
|                  | $n_{\text{O}} \longrightarrow \sigma_{\text{OH}}^*$    |                 | 4.26  |       |
|                  | $n'_{\text{O}} \longrightarrow \sigma_{\text{OH}}^*$   |                 | 10.55 |       |
| <b>cttADP-26</b> | $n_{\text{N}} \longrightarrow \sigma_{\text{NH}}^*$    | $\text{C}_5$    | 0.59  | 0.59  |
|                  | $n_{\text{N}} \longrightarrow \sigma_{\text{OH}}^*$    | $\text{C}_6$    | 4.34  | 4.34  |
| <b>cttADP-27</b> | $n_{\text{N}} \longrightarrow \sigma_{\text{NH}}^*$    | $\text{C}_5$    | 0.82  | 0.82  |
|                  | $n_{\text{N}} \longrightarrow \sigma_{\text{OH}}^*$    | $\text{C}_5$    | 3.00  | 3.00  |
| <b>cccADP-28</b> | $\pi_{\text{CO}} \longrightarrow \sigma_{\text{OH}}^*$ | $\text{C}_{10}$ | 1.75  | 5.67  |
|                  | $n_{\text{O}} \longrightarrow \sigma_{\text{OH}}^*$    |                 | 3.28  |       |
|                  | $n'_{\text{O}} \longrightarrow \sigma_{\text{OH}}^*$   |                 | 0.64  |       |
| <b>cctADP-29</b> | $n_{\text{N}} \longrightarrow \sigma_{\text{OH}}^*$    | $\text{C}_6$    | 10.90 | 10.90 |
| <b>cccADP-30</b> | $n_{\text{O}} \longrightarrow \sigma_{\text{OH}}^*$    | $\text{C}_7$    | 5.23  | 12.52 |
|                  | $n'_{\text{O}} \longrightarrow \sigma_{\text{OH}}^*$   |                 | 7.29  |       |

**Table S18:** NBO orbital interactions, E(2) values, corresponding to hydrogen bond for AAP with B3LYP-D<sub>3</sub> method.

|           | Donor $\longrightarrow$ Acceptor         | Cycle           | E(2) (Kcal/mol) | $\Sigma E_{HB}$ (Kcal/mol) |
|-----------|------------------------------------------|-----------------|-----------------|----------------------------|
| tttAAP-1  | $\pi_{CO} \longrightarrow \sigma_{NH}^*$ | C <sub>10</sub> | 1.94            | 4.15                       |
|           | $n_O \longrightarrow \sigma_{NH}^*$      |                 | 2.21            |                            |
| tttAAP-2  | $\pi_{CO} \longrightarrow \sigma_{NH}^*$ | C <sub>7</sub>  | 1.24            | 2.55                       |
|           | $n_O \longrightarrow \sigma_{NH}^*$      |                 | 0.63            |                            |
|           | $n'_O \longrightarrow \sigma_{NH}^*$     |                 | 0.68            |                            |
| tttAAP-3  | $\pi_{CO} \longrightarrow \sigma_{NH}^*$ | C <sub>7</sub>  | 0.68            | 3.70                       |
|           | $n_O \longrightarrow \sigma_{NH}^*$      |                 | 1.29            |                            |
|           | $n'_O \longrightarrow \sigma_{NH}^*$     |                 | 1.73            |                            |
| tttAAP-4  | $\pi_{CO} \longrightarrow \sigma_{NH}^*$ | C <sub>7</sub>  | 0.96            | 3.08                       |
|           | $n_O \longrightarrow \sigma_{NH}^*$      |                 | 0.98            |                            |
|           | $n'_O \longrightarrow \sigma_{NH}^*$     |                 | 1.14            |                            |
|           | $n'_O \longrightarrow \sigma_{NH}^*$     | C <sub>5</sub>  | 0.96            | 0.96                       |
| tctAAP-5  | $\pi_{CO} \longrightarrow \sigma_{NH}^*$ | C <sub>10</sub> | 0.68            | 10.12                      |
|           | $n_O \longrightarrow \sigma_{NH}^*$      |                 | 4.07            |                            |
|           | $n'_O \longrightarrow \sigma_{NH}^*$     |                 | 5.37            |                            |
| cttAAP-6  | $\pi_{CO} \longrightarrow \sigma_{NH}^*$ | C <sub>7</sub>  | 0.61            | 4.27                       |
|           | $n_O \longrightarrow \sigma_{NH}^*$      |                 | 1.67            |                            |
|           | $n'_O \longrightarrow \sigma_{NH}^*$     |                 | 1.99            |                            |
| cttAAP-7  | $\pi_{CO} \longrightarrow \sigma_{NH}^*$ | C <sub>7</sub>  | 0.86            | 9.25                       |
|           | $n_O \longrightarrow \sigma_{NH}^*$      |                 | 3.45            |                            |
|           | $n'_O \longrightarrow \sigma_{NH}^*$     |                 | 4.94            |                            |
| tctAAP-8  | $n_N \longrightarrow \sigma_{NH}^*$      | C <sub>5</sub>  | 1.44            | 1.44                       |
| tttAAP-9  | $n_N \longrightarrow \sigma_{NH}^*$      | C <sub>5</sub>  | 1.80            | 1.80                       |
| tctAAP-10 | $\pi_{CO} \longrightarrow \sigma_{NH}^*$ | C <sub>8</sub>  | 0.88            | 0.88                       |
| cttAAP-11 | $n_N \longrightarrow \sigma_{NH}^*$      | C <sub>5</sub>  | 1.15            | 1.15                       |
| tctAAP-12 | $n'_O \longrightarrow \sigma_{NH}^*$     | C <sub>5</sub>  | 1.43            | 1.43                       |
|           | $n_N \longrightarrow \sigma_{NH}^*$      | C <sub>5</sub>  | 1.48            | 1.48                       |
| cctAAP-13 | $n_N \longrightarrow \sigma_{NH}^*$      | C <sub>5</sub>  | 1.11            | 1.11                       |
| tttAAP-14 | $n_O \longrightarrow \sigma_{NH}^*$      | C <sub>8</sub>  | 2.77            | 5.56                       |
|           | $n'_O \longrightarrow \sigma_{NH}^*$     |                 | 2.79            |                            |
| cctAAP-15 | No interaction                           |                 |                 |                            |
| cttAAP-16 | $n_N \longrightarrow \sigma_{NH}^*$      | C <sub>5</sub>  | 1.01            | 1.01                       |
| cctAAP-17 | No interaction                           |                 |                 |                            |
| ttcAAP-18 | No interaction                           |                 |                 |                            |
| cctAAP-19 | $n_N \longrightarrow \sigma_{NH}^*$      | C <sub>7</sub>  | 4.86            | 4.86                       |
| cccAAP-20 | No interaction                           |                 |                 |                            |
| tccAAP-21 | No interaction                           |                 |                 |                            |
| cccAAP-22 | No interaction                           |                 |                 |                            |

**Table S19.** Dihedral angle values (in degrees) of all the optimized structures of Ac-Asn-Pro-NHMe at the B3LYP/6-311++G(d,p) level of theory in gas phase.

| No.      | $\Delta E$ (kcal/mol) | $\omega_0$ | $\varphi_1$ | $\psi_1$ | $\omega_1$ | $\varphi_2$ | $\psi_2$ | $\omega_2$ | $\chi_1'$ | $\chi_2'$ | $\chi_1$ | $\chi_2$ | $\chi_3$ | $\chi_4$ | Conformer                   |
|----------|-----------------------|------------|-------------|----------|------------|-------------|----------|------------|-----------|-----------|----------|----------|----------|----------|-----------------------------|
| tttNP-01 | 0.00                  | 177.4      | -163.2      | 161.8    | -174.1     | -84.5       | 69.3     | -178.3     | -121.8    | 59.1      | 32.3     | -37.7    | 27.8     | -7.8     | $\varepsilon''\gamma'(s-)$  |
| tttNP-02 | 1.54                  | 173.9      | -160.8      | 166.1    | -176.0     | -94.7       | 13.9     | 175.3      | 67.8      | -106.0    | 35.2     | -37.7    | 25.4     | -3.4     | $\varepsilon''\delta_R(g+)$ |
| tttNP-03 | 1.59                  | 174.7      | -74.2       | 151.2    | 166.3      | -55.9       | 141.5    | -178.1     | 56.0      | 109.6     | -27.0    | 37.2     | -32.7    | 16.6     | $\beta_P\beta_P(g+)$        |
| tttNP-04 | 2.29                  | 176.5      | -58.7       | 119.6    | 179.8      | 81.9        | 5.6      | -178.4     | 47.8      | 115.9     | -35.2    | 37.1     | -24.4    | 2.1      | $\beta_P\delta_L(g+)$       |
| tttNP-05 | 2.43                  | -169.0     | -125.4      | 77.5     | -170.1     | -84.0       | 76.9     | -176.4     | 55.9      | 139.9     | -9.7     | 29.4     | -37.7    | 33.3     | $?\gamma'(g+)$              |
| tttNP-06 | 3.19                  | 178.2      | -176.5      | 161.5    | -179.8     | -85.7       | 69.9     | -171.9     | 48.5      | 148.2     | 31.8     | -37.3    | 27.8     | -8.1     | $\beta_S\gamma'(g+)$        |
| tttNP-07 | 3.29                  | 174.2      | -60.1       | 121.5    | 179.5      | 85.3        | 3.7      | -178.4     | -172.6    | -135.8    | -35.2    | 36.8     | -23.7    | 1.3      | $\beta_P\delta_L(t)$        |
| tctNP-08 | 3.42                  | -179.7     | -167.4      | 154.1    | -0.2       | -86.1       | 0.1      | -179.6     | -126.5    | 65.1      | 33.5     | -37.4    | 26.4     | -5.3     | $\beta_S\delta_R(s-)$       |
| tctNP-09 | 3.86                  | -167.5     | -122.9      | 70.4     | 3.5        | -103.0      | 144.9    | 177.1      | 57.5      | 133.4     | 36.4     | -32.1    | 15.2     | 8.5      | $\xi\beta_S(g+)$            |
| tctNP-10 | 3.88                  | -172.5     | -124.6      | 42.0     | 6.6        | -95.9       | -8.3     | 177.8      | 64.8      | 148.2     | 34.1     | -37.3    | 25.8     | -18.7    | $?\delta_R(g+)$             |
| tttNP-11 | 4.49                  | 174.8      | -74.4       | 152.0    | 166.1      | -56.4       | 138.7    | -18.5      | 56.0      | 110.0     | -26.4    | 37.2     | -33.2    | 17.5     | $\beta_P\beta_P(g+)$        |
| tccNP-12 | 4.64                  | 176.4      | -168.8      | 165.3    | -6.0       | -71.5       | 166.2    | 1.4        | -120.3    | 70.8      | 33.0     | -37.0    | 26.3     | -5.5     | $\beta_S\beta_P(s-)$        |
| tttNP-13 | 4.67                  | -173.2     | -71.1       | -31.5    | -172.5     | 63.5        | -145.5   | 177.8      | 50.3      | 102.8     | -26.0    | 36.0     | -31.8    | 16.2     | $\delta_RE(g+)$             |
| tctNP-14 | 4.71                  | -168.4     | -126.6      | 83.7     | -2.2       | -97.6       | 139.4    | 178.2      | 38.1      | 53.1      | 36.0     | -30.5    | 13.2     | 10.4     | $\xi\beta_S(g+)$            |
| ttcNP-15 | 4.89                  | 174.1      | -74.7       | 153.3    | 169.9      | -70.2       | 156.9    | -11.3      | 57.5      | 107.9     | 28.7     | -35.8    | 28.9     | -11.2    | $\beta_P\beta_P(g+)$        |
| tttNP-16 | 5.60                  | -175.7     | -68.3       | -12.7    | 171.8      | -96.2       | 9.0      | 176.2      | 59.9      | 128.2     | 35.7     | -33.8    | 18.9     | 3.9      | $\delta_R\delta_R(g+)$      |
| ttcNP-17 | 7.53                  | -173.1     | -71.0       | -31.5    | -172.7     | 64.4        | -146.3   | 16.8       | 49.8      | 102.7     | -26.2    | 36.0     | -31.6    | 15.8     | $\delta_RE(g+)$             |
| tttNP-18 | 7.72                  | -170.7     | -58.9       | -31.9    | 177.5      | -71.6       | -12.4    | 178.8      | -154.4    | -19.2     | -22.9    | 36.6     | -36.0    | 22.7     | $\alpha_R\delta_R(t)$       |

**Table S20.** The relative energies (DE, in kcal/mol) and dihedral angle values (in degrees) of all the optimized structures of Ac-Asn-Pro-NHMe at the B3LYP-D3/6-311++G(d,p) level of theory in gas phase.

| No.      | $\Delta E$ | $\omega_0$ | $\varphi_1$ | $\psi_1$ | $\omega_1$ | $\varphi_2$ | $\psi_2$ | $\omega_2$ | $\chi_1'$ | $\chi_2'$ | $\chi_1$ | $\chi_2$ | $\chi_3$ | $\chi_4$ | Conformer                  |
|----------|------------|------------|-------------|----------|------------|-------------|----------|------------|-----------|-----------|----------|----------|----------|----------|----------------------------|
| tttNP-01 | 0.00       | 178.4      | -164.6      | 162.3    | -175.7     | -84.8       | 69.2     | -177.0     | -122.6    | 58.0      | 33.7     | -38.5    | 27.8     | -6.8     | $\beta_S\gamma'(s-)$       |
| tttNP-02 | 0.58       | -179.6     | 173.2       | 169.1    | 178.4      | -92.1       | 17.4     | 174.9      | 54.5      | -100.1    | 34.9     | -39.3    | 28.3     | -6.4     | $\varepsilon\delta_R(g+)$  |
| tttNP-03 | 1.00       | 171.9      | -68.7       | 150.5    | 164.5      | -53.5       | 134.6    | -175.1     | 56.2      | 109.2     | -27.5    | 37.9     | -33.2    | 16.7     | $\beta_P\beta_P(g+)$       |
| tttNP-04 | 0.90       | 175.8      | -57.84      | 117.5    | -179.6     | 78.1        | 9.5      | -178.8     | 46.3      | 108.0     | -35.6    | 38.3     | -25.8    | 3.3      | $\beta\delta_L(g+)$        |
| tttNP-05 | 3.03       | -169.3     | -127.4      | 72.4     | -168.5     | -85.4       | 76.2     | -174.9     | 57.4      | 137.3     | -8.7     | 29.5     | -38.9    | 35.2     | $\xi\gamma'(g+)$           |
| tttNP-06 | 1.90       | -178.9     | 177.5       | 162.9    | 175.5      | -85.8       | 68.2     | -170.2     | -48.4     | -99.7     | 33.4     | -38.4    | 28.0     | -7.2     | $\varepsilon\gamma'(g-)$   |
| tttNP-07 | 1.58       | 172.6      | -59.9       | 123.3    | -180.0     | 82.7        | 5.4      | -178.6     | 177.5     | -99.8     | -35.8    | 37.9     | -25.0    | 2.3      | $\beta_P\delta_L(t)$       |
| tctNP-08 | 2.60       | -179.1     | -167.4      | 154.5    | -2.4       | -79.8       | -2.1     | -179.0     | -128.6    | 64.0      | 33.1     | -38.6    | 28.6     | -7.9     | $\beta_S\delta_R(s-)$      |
| tctNP-09 | 1.27       | -163.7     | -125.6      | 56.4     | 4.8        | -95.7       | 155.0    | 177.7      | 54.4      | 106.6     | 36.5     | -36.6    | 22.4     | 1.0      | $\xi\varepsilon''(g+)$     |
| tctNP-10 | 0.45       | -176.5     | -113.9      | 25.3     | 9.0        | -88.8       | -3.9     | 174.5      | 69.8      | 159.2     | 34.3     | -39.2    | 28.7     | 7.3      | $\delta_R\delta_R(g+)$     |
| tttNP-11 | 3.29       | 171.8      | -68.5       | 152.0    | 164.5      | -54.5       | 131.8    | -20.5      | 56.4      | 109.4     | -26.9    | 37.4     | -33.8    | 17.7     | $\beta_P\beta_P(g+)$       |
| tccNP-12 | 2.69       | 176.2      | -166.1      | 166.6    | -6.6       | -67.2       | 165.9    | 1.7        | -121.3    | 63.6      | 32.8     | -38.3    | 28.6     | -8.1     | $\varepsilon''\beta_P(s-)$ |
| tttNP-13 | 2.00       | -177.2     | -60.9       | -33.5    | -172.6     | 62.2        | -142.3   | 176.7      | 50.9      | 100.1     | -25.9    | 37.1     | -33.8    | 18.3     | $\alpha_R\varepsilon(g+)$  |
| tctNP-14 | 1.27       | -163.7     | -125.6      | 56.4     | 4.8        | -95.7       | 154.9    | 177.7      | 54.4      | 106.6     | 36.5     | -36.6    | 22.4     | 1.0      | $?\varepsilon''(g+)$       |
| ttcNP-15 | 3.72       | 170.9      | -68.8       | 154.3    | 167.9      | -63.2       | 136.2    | -19.5      | 58.3      | 107.6     | 26.8     | -36.3    | 31.3     | -15.2    | $\beta_P\beta_P(g+)$       |
| tttNP-16 | 3.33       | -178.1     | -63.5       | -17.6    | 173.7      | -95.7       | 9.2      | 176.6      | 63.4      | 110.1     | 37.3     | -34.1    | 17.9     | 6.1      | $\delta_R\delta_R(g+)$     |
| ttcNP-17 | 4.23       | -177.4     | -60.5       | -34.0    | -172.2     | 62.2        | -137.5   | 21.1       | 50.5      | 100.9     | -25.2    | 36.4     | 18.7     | 4.1      | $\alpha_R\varepsilon(g+)$  |
| tttNP-18 | 6.46       | -174.2     | -55.9       | -33.5    | 177.8      | -68.4       | -15.0    | 178.6      | -157.8    | -15.3     | -24.0    | 37.6     | -36.3    | 22.3     | $\alpha_R\delta_R(t)$      |
| ttcNP-19 | 4.13       | -165.8     | -127.2      | 52.9     | 2.0        | -90.0       | 166.1    | 1.3        | 53.6      | 99.6      | 36.6     | -37.4    | 23.5     | -0.1     | $?\beta_P(g+)$             |

**Table S21.** The relative energies ( $\Delta E$ , in kcal/mol) and dihedral angle values (in degrees) of all the optimized structures of Ac-Asp-Pro-NHMe (**8**, **DP**) at the B3LYP/6-311++G(d,p) level of theory in gas phase.

| No.      | $\Delta E$  | $\omega_0$ | $\varphi_1$ | $\psi_1$ | $\omega_1$ | $\varphi_2$ | $\psi_2$ | $\omega_2$ | $\chi_1'$ | $\chi_2'$ | $\chi_1$ | $\chi_2$ | $\chi_3$ | $\chi_4$ | Conformer                    |
|----------|-------------|------------|-------------|----------|------------|-------------|----------|------------|-----------|-----------|----------|----------|----------|----------|------------------------------|
| tctDP-01 | <b>0.00</b> | -177.1     | 172.9       | -168.2   | 0.5        | 70.0        | -144.9   | -177.4     | 116.5     | -64.7     | -30.4    | 37.1     | -29.0    | 10.2     | $\varepsilon\varepsilon(s+)$ |
| tttDP-02 | <b>0.92</b> | 171.6      | 132.1       | -67.8    | -173.5     | -84.3       | 71.5     | -177.3     | -58.8     | -152.6    | 31.7     | -37.2    | 27.7     | -8.0     | $?\gamma'(g-)$               |
| tttDP-03 | <b>0.92</b> | -171.6     | -132.1      | 67.9     | 173.6      | 84.3        | -71.5    | 177.3      | 58.8      | 152.6     | -31.7    | 37.3     | -27.7    | 8.0      | $\xi\gamma(g+)$              |
| tttDP-04 | <b>1.51</b> | -179.8     | -141.1      | 113.6    | -175.5     | -87.6       | -0.7     | 177.1      | -176.5    | 166.7     | 34.6     | -37.5    | 25.5     | -3.6     | $\beta_S\delta_R(t)$         |
| tttDP-05 | <b>1.63</b> | -172.0     | -121.8      | 85.2     | -171.8     | -83.0       | 77.2     | -176.4     | 56.0      | 142.8     | -10.9    | 30.0     | -37.4    | 32.2     | $\xi\gamma'(g+)$             |
| tttDP-06 | <b>2.13</b> | 177.5      | 103.1       | -104.2   | -176.2     | -82.5       | 72.3     | -178.6     | -40.2     | -46.9     | 32.7     | -38.7    | 29.0     | -8.7     | $?\gamma'(g-)$               |
| tttDP-07 | <b>2.38</b> | -176.5     | 170.7       | -172.9   | -8.0       | -102.5      | 136.5    | 178.1      | 113.0     | -62.4     | 36.1     | -27.2    | 7.7      | 16.2     | $\varepsilon\beta_S(s+)$     |
| tctDP-08 | <b>2.38</b> | -176.6     | 89.9        | -119.4   | 173.2      | 85.4        | -69.2    | 177.5      | -65.6     | 60.5      | -32.4    | 37.2     | -26.9    | 6.8      | $?\gamma(g-)$                |
| tttDP-09 | <b>2.51</b> | 179.0      | 55.7        | -124.5   | -177.2     | -82.8       | -1.0     | 177.3      | 54.8      | 120.8     | 35.5     | -37.3    | 24.3     | -1.8     | $\varepsilon\delta_R(g+)$    |
| tttDP-10 | <b>2.70</b> | -178.2     | 57.2        | -120.0   | -178.1     | -83.0       | -4.0     | 178.4      | -42.8     | -44.7     | 35.5     | -37.4    | 24.4     | -1.8     | $\varepsilon\delta_R(g-)$    |
| tttDP-11 | <b>2.95</b> | 179.6      | -100.9      | 107.8    | 175.0      | 81.9        | -70.6    | 178.3      | 64.4      | -54.5     | -32.2    | 38.7     | -29.4    | 9.5      | $\beta_S\gamma(g+)$          |
| tttDP-12 | <b>3.39</b> | 174.9      | -58.1       | 129.5    | 179.4      | 84.3        | -0.4     | -177.2     | -60.7     | 92.3      | -35.4    | 37.0     | -23.9    | 1.5      | $\varepsilon''\delta_L(g-)$  |
| tttDP-13 | <b>3.58</b> | -169.5     | -43.0       | -54.9    | -173.6     | -91.1       | 12.2     | 175.0      | 61.6      | 179.8     | 34.1     | -37.4    | 26.0     | -4.5     | $\alpha_R\delta_R(g+)$       |
| tttDP-14 | <b>7.84</b> | -173.8     | -98.4       | -25.9    | -165.0     | 70.7        | -102.6   | 174.6      | 67.3      | 115.1     | 21.6     | -35.6    | 35.6     | -23.1    | $\delta_R?(g+)$              |

**Table S22.** The relative energies ( $\Delta E$ , in kcal/mol) and dihedral angle values (in degrees) of all the optimized structures of Ac-Asp-Pro-NHMe (**8**, **DP**) at the B3LYP-D3/6-311++G(d,p) level of theory in gas phase.

| No.      | $\Delta E$ | $\omega_0$ | $\varphi_1$ | $\psi_1$ | $\omega_1$ | $\varphi_2$ | $\psi_2$ | $\omega_2$ | $\chi_1'$ | $\chi_2'$ | $\chi_1$ | $\chi_2$ | $\chi_3$ | $\chi_4$ | Conformer                    |
|----------|------------|------------|-------------|----------|------------|-------------|----------|------------|-----------|-----------|----------|----------|----------|----------|------------------------------|
| tctDP-01 | 0.00       | -176.8     | 170.5       | -168.5   | 2.0        | 63.9        | -147.3   | 178.8      | 117.9     | -60.6     | -30.1    | 38.5     | -31.5    | 13.1     | $\varepsilon\varepsilon(s+)$ |
| tttDP-02 | 5.40       | 179.7      | 70.2        | 30.4     | 166.8      | -76.6       | 97.8     | -171.7     | -69.4     | -107.0    | 29.4     | -36.2    | 28.7     | -10.6    | $\delta_L\gamma'(g-)$        |
| tttDP-03 | 5.52       | 178.4      | -69.4       | -30.4    | -166.8     | 76.6        | -97.8    | 171.7      | 69.4      | 107.1     | -29.3    | 36.3     | -28.8    | 10.8     | $\delta_R?(g+)$              |
| tttDP-04 | 3.07       | 171.8      | -98.9       | 111.4    | -175.8     | -86.0       | -2.2     | 177.2      | -176.6    | 172.0     | 35.9     | -37.9    | 24.8     | -2.0     | $\beta_S\delta_R(t)$         |
| tttDP-05 | 14.43      | -179.1     | -120.5      | 28.7     | -175.8     | 32.8        | 49.4     | -172.4     | 65.4      | 170.9     | -37.4    | 17.3     | 8.7      | -32.7    | $\delta_R?(g+)$              |
| tttDP-06 | 4.20       | 169.7      | 127.1       | -81.9    | -179.1     | -82.1       | 73.7     | -177.1     | -40.1     | -58.3     | 33.6     | -39.2    | 28.9     | -8.0     | $?\gamma'(g-)$               |
| tttDP-07 | 3.07       | -176.8     | 170.9       | -174.7   | -10.8      | -97.5       | 141.5    | 179.1      | 114.2     | -62.0     | 37.1     | -30.0    | 10.7     | 13.7     | $\varepsilon\beta_S(s+)$     |
| tctDP-08 | 4.14       | -170.7     | 74.1        | -133.4   | -178.5     | 85.6        | -68.3    | 172.5      | -68.9     | 67.8      | -32.7    | 37.7     | -27.6    | 7.2      | $\varepsilon\gamma(g-)$      |
| tttDP-09 | 3.83       | -178.9     | 57.9        | -122.3   | -178.9     | -78.8       | -6.3     | 178.1      | 55.5      | 111.8     | 36.2     | -38.2    | 25.1     | -2.1     | $\varepsilon\delta_R(g+)$    |
| tttDP-10 | 3.20       | -175.0     | 59.5        | -119.3   | 179.6      | -79.9       | -7.9     | 178.9      | -41.7     | -40.5     | 35.9     | -38.4    | 25.5     | -2.7     | $\varepsilon\delta_R(g-)$    |
| tttDP-11 | 5.15       | 176.5      | -94.9       | 107.9    | 176.8      | 82.0        | -70.8    | 176.8      | 64.9      | -55.7     | -33.4    | 39.5     | -29.6    | 8.9      | $\beta_S\gamma(g+)$          |
| tttDP-12 | 4.58       | 174.0      | -59.3       | 125.1    | -179.6     | 80.0        | 5.7      | -178.2     | -59.6     | 90.4      | -36.2    | 38.0     | -25.0    | 1.7      | $\beta_P\delta_L(g-)$        |
| tttDP-13 | 4.39       | -170.4     | -44.8       | -52.5    | -174.5     | -90.9       | 11.7     | 175.3      | 61.1      | -179.0    | 35.5     | -38.0    | 25.5     | -3.0     | $?\delta_R(g+)$              |
| tttDP-14 | 6.59       | -178.6     | -85.0       | -29.1    | -162.2     | 70.8        | -98.4    | 172.5      | 69.9      | 114.9     | 20.7     | -35.5    | 36.3     | -24.3    | $\delta_R?(g+)$              |

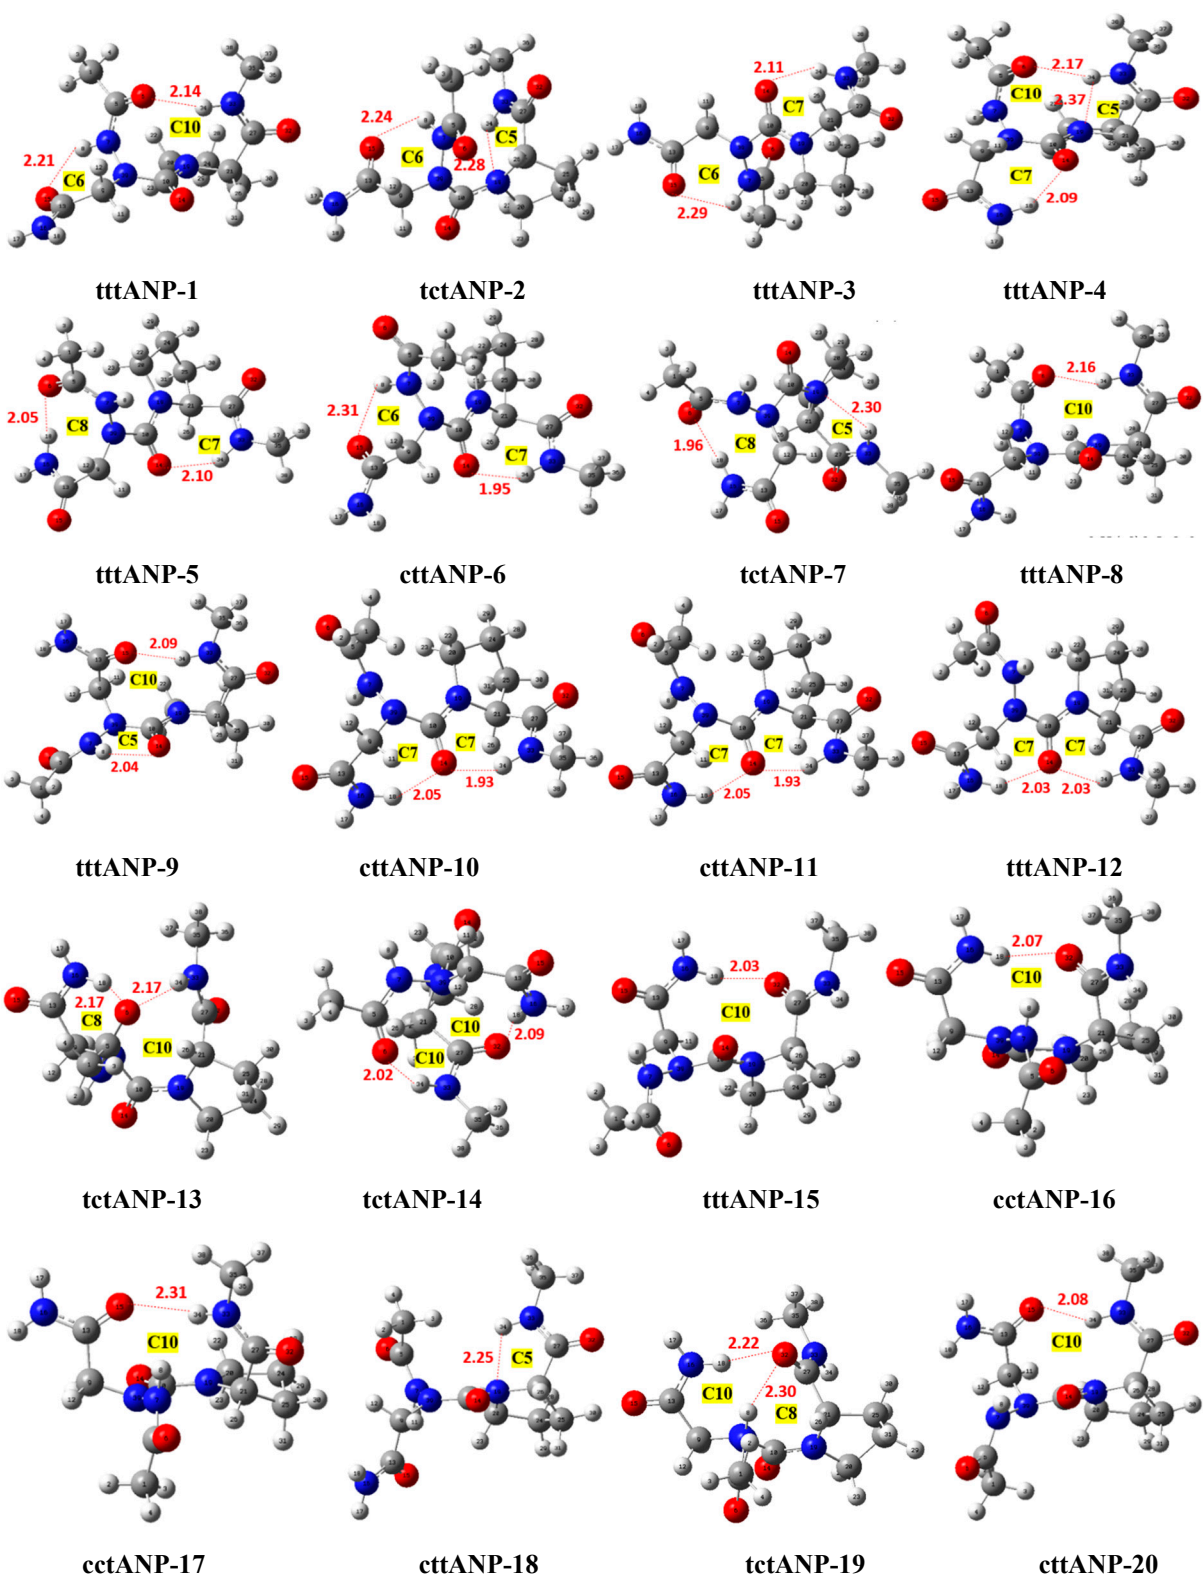

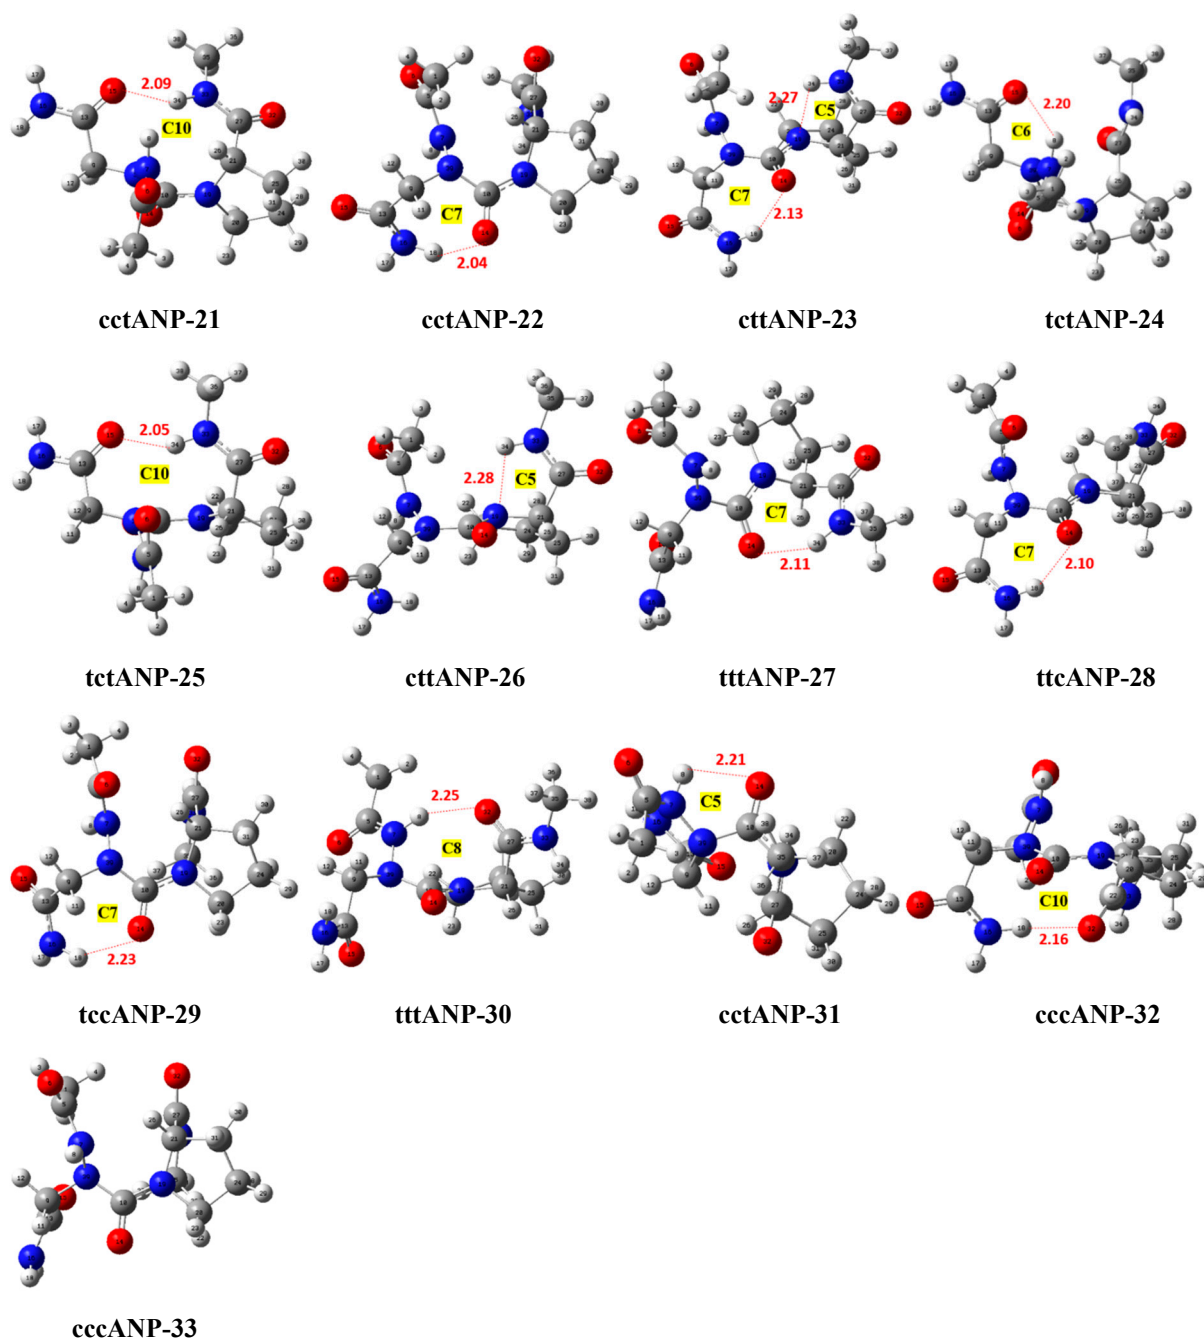

**Figure S1.** Hydrogen bonds (red dashed line) stabilizing the 33 optimized structures of Ac-azaAsn-Pro-NHMe calculated in the gas phase at the B3LYP/6-311++G (d,p) level of theory.



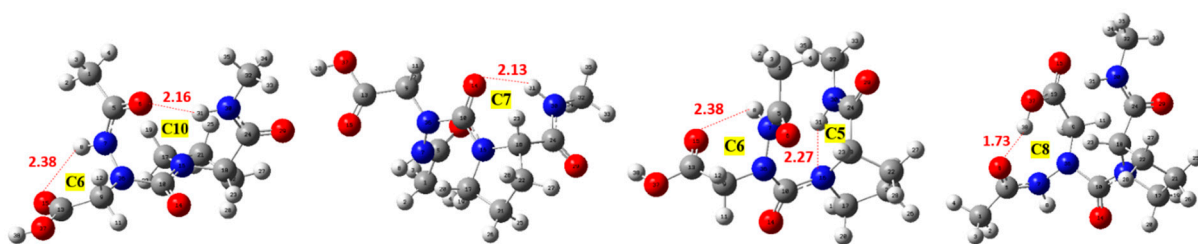

tttADP-1

tttADP-2

tctADP-3

tctADP-4

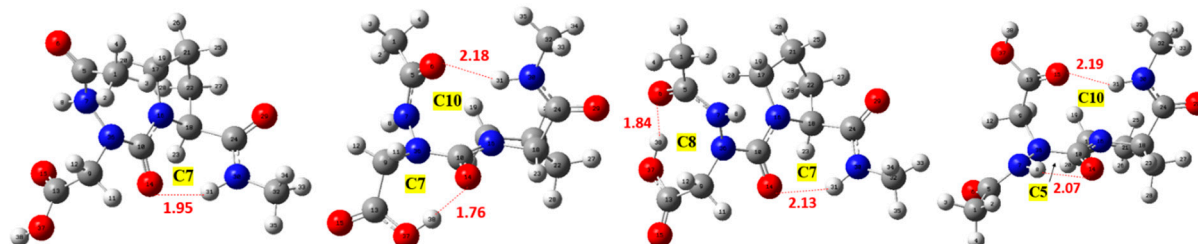

cttADP-5

tttADP-6

tttADP-7

tttADP-8

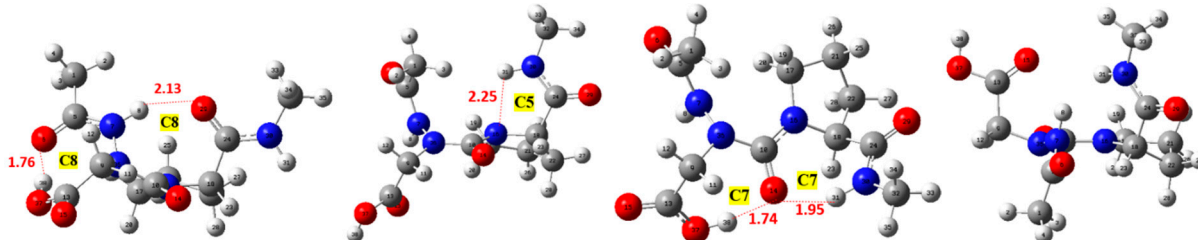

tttADP-9

cttADP-10

cttADP-11

cttADP-12

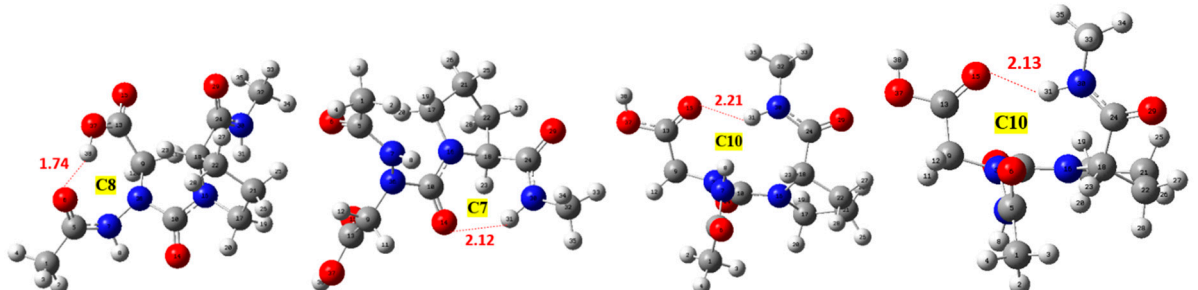

tctADP-13

tttADP-14

cctADP-15

tctADP-16

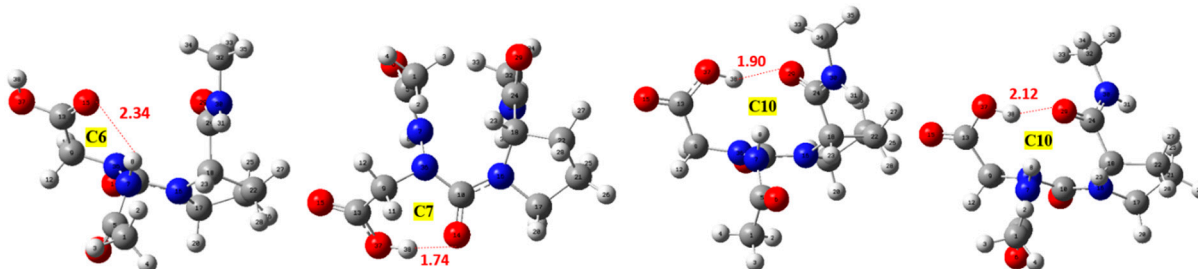

tctADP-17

cctADP-18

cctADP-19

tctADP-20

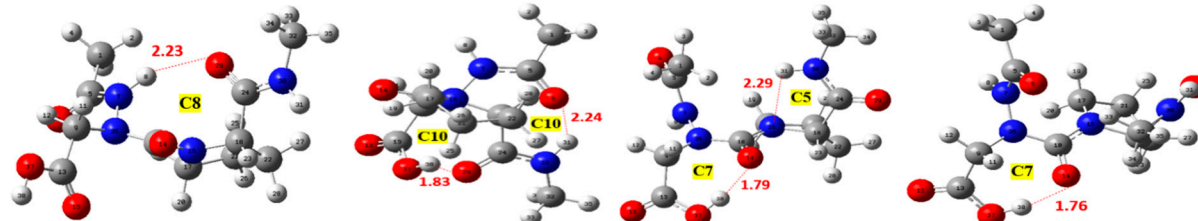

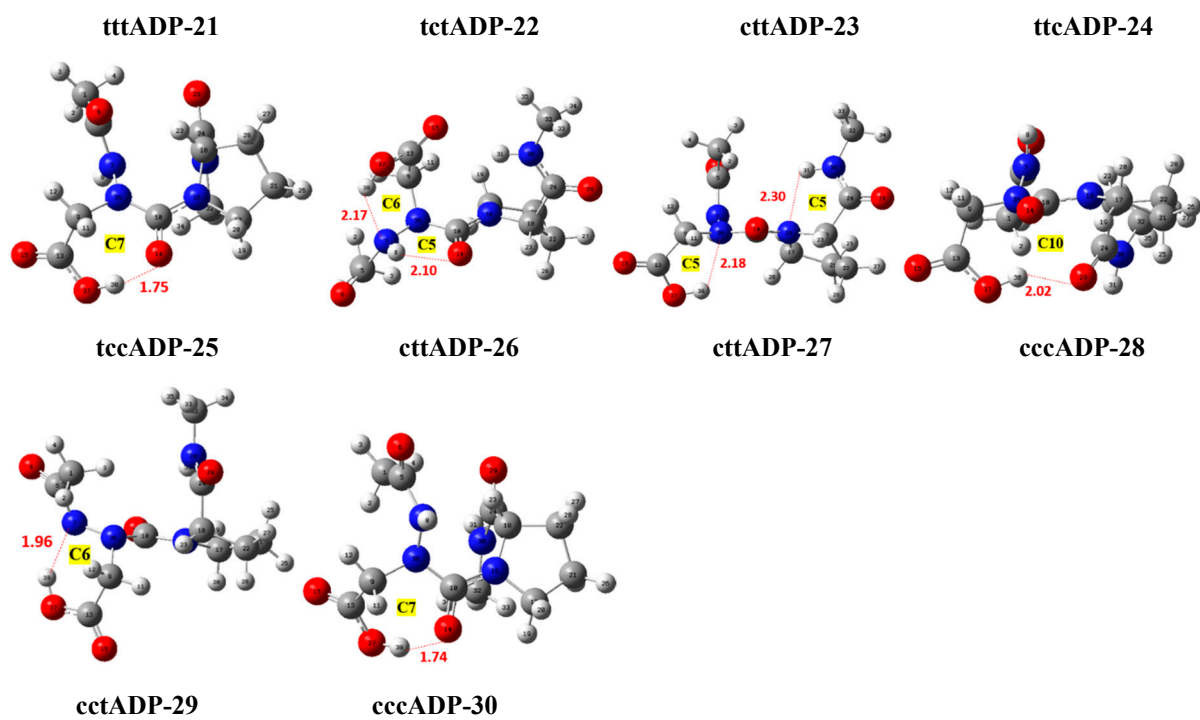

**Figure S2.** B3LYP/6-311++G(d,p)-optimized structures of Ac-azaAsp-Pro-NHMe. Hydrogen bonds are shown in red dashed line.

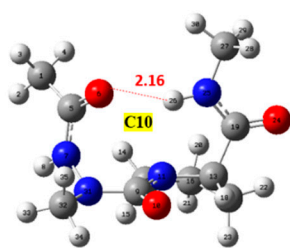

tttAAP-1

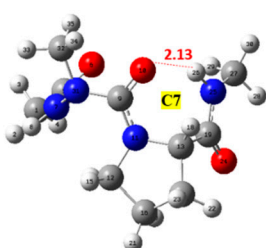

tttAAP-2

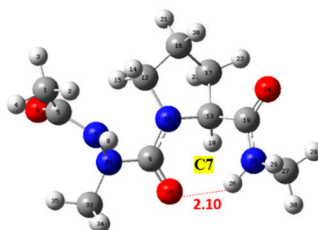

tttAAP-3

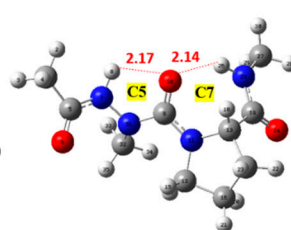

tttAAP-4

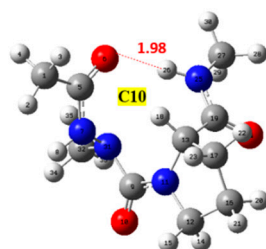

tctAAP-5

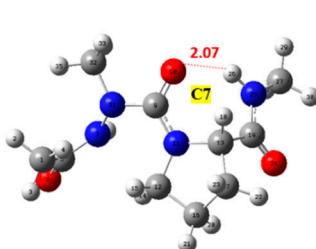

cttAAP-6

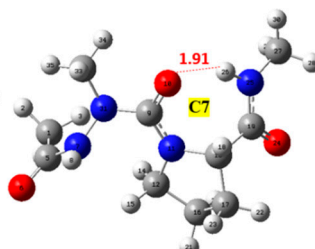

cttAAP-7

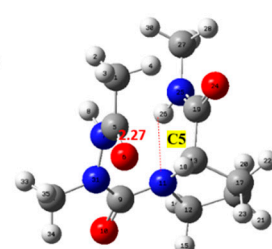

tctAAP-8

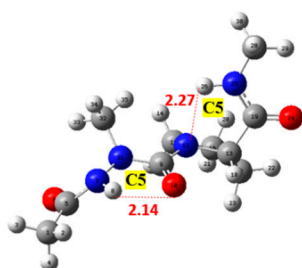

tttAAP-9

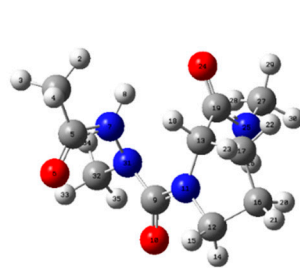

tctAAP-10

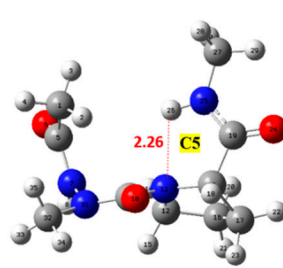

cttAAP-11

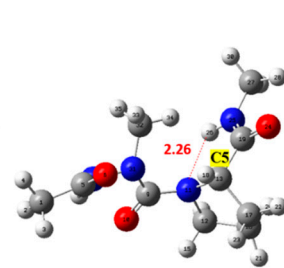

tctAAP-12

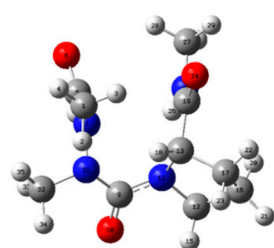

cctAAP-13

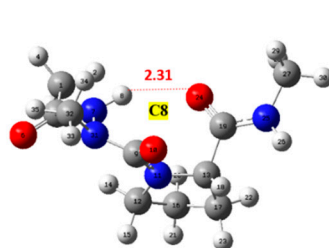

tttAAP-14

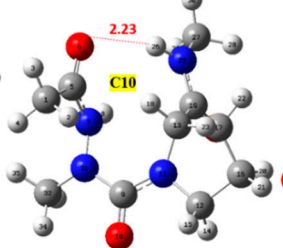

cctAAP-15

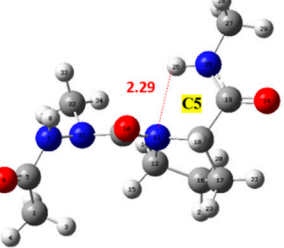

cttAAP-16

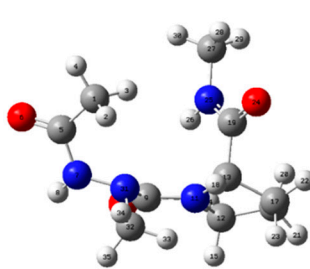

cctAAP-17

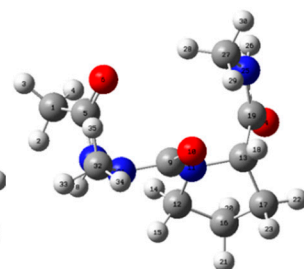

ttcAAP-18

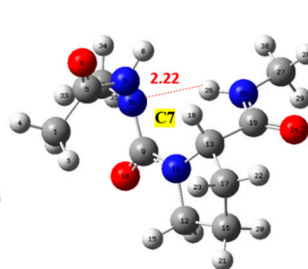

cctAAP-19

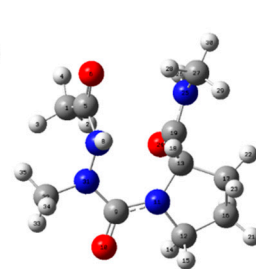

cccAAP-20

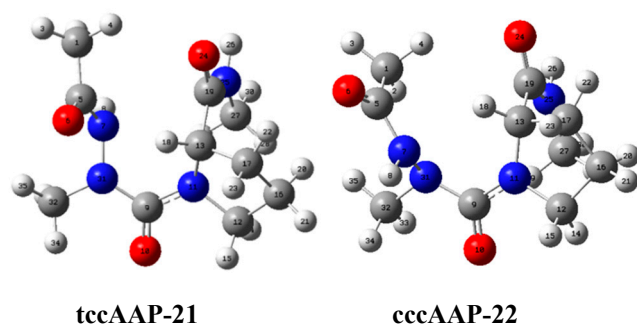

**Figure S3.** Hydrogen bonds (red dashed line) stabilizing the 22 optimized structures of Ac-azaAla-Pro-NHMe calculated in the gas phase at B3LYP/6-311++G (d,p) level of theory.

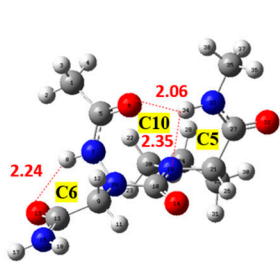

tttANP-1

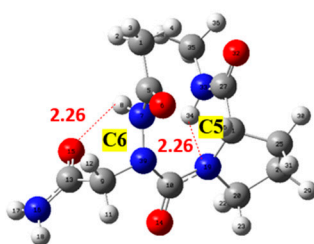

tctANP-2

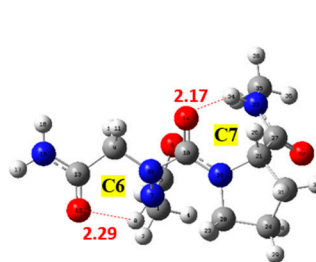

tttANP-3

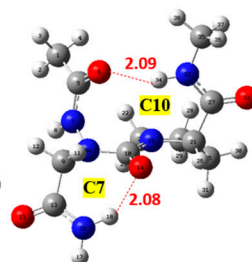

tttANP-4

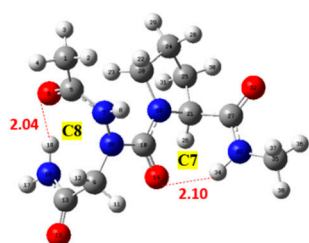

tttANP-5

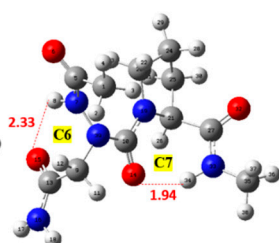

cttANP-6

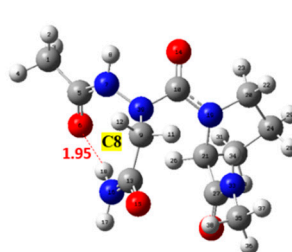

tctANP-7

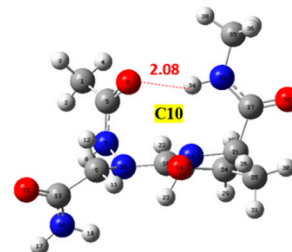

tttANP-8

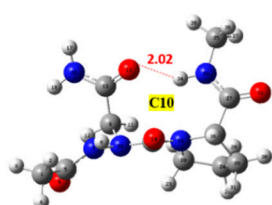

tttANP-9

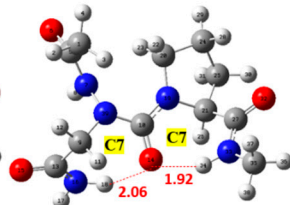

cttANP-10

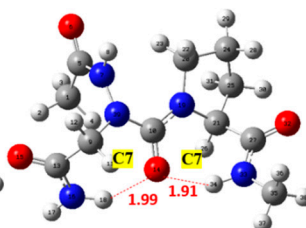

cttANP-11

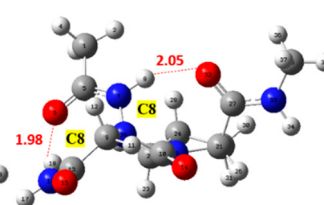

tttANP-12

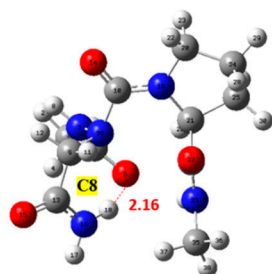

tctANP-13

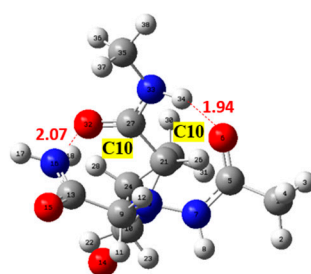

tctANP-14

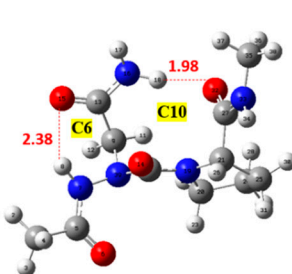

tttANP-15

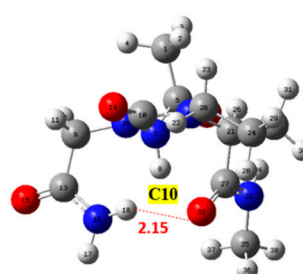

cctANP-16

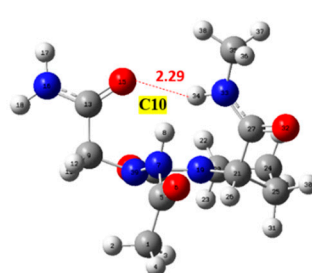

cctANP-17

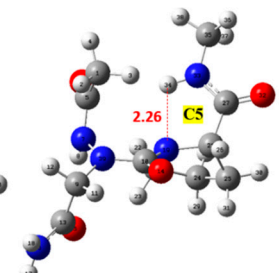

cttANP-18

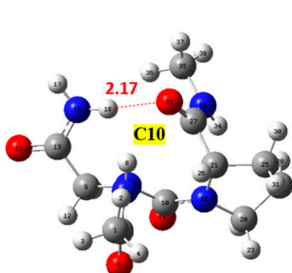

tctANP-19

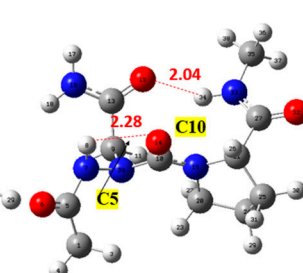

cttANP-20



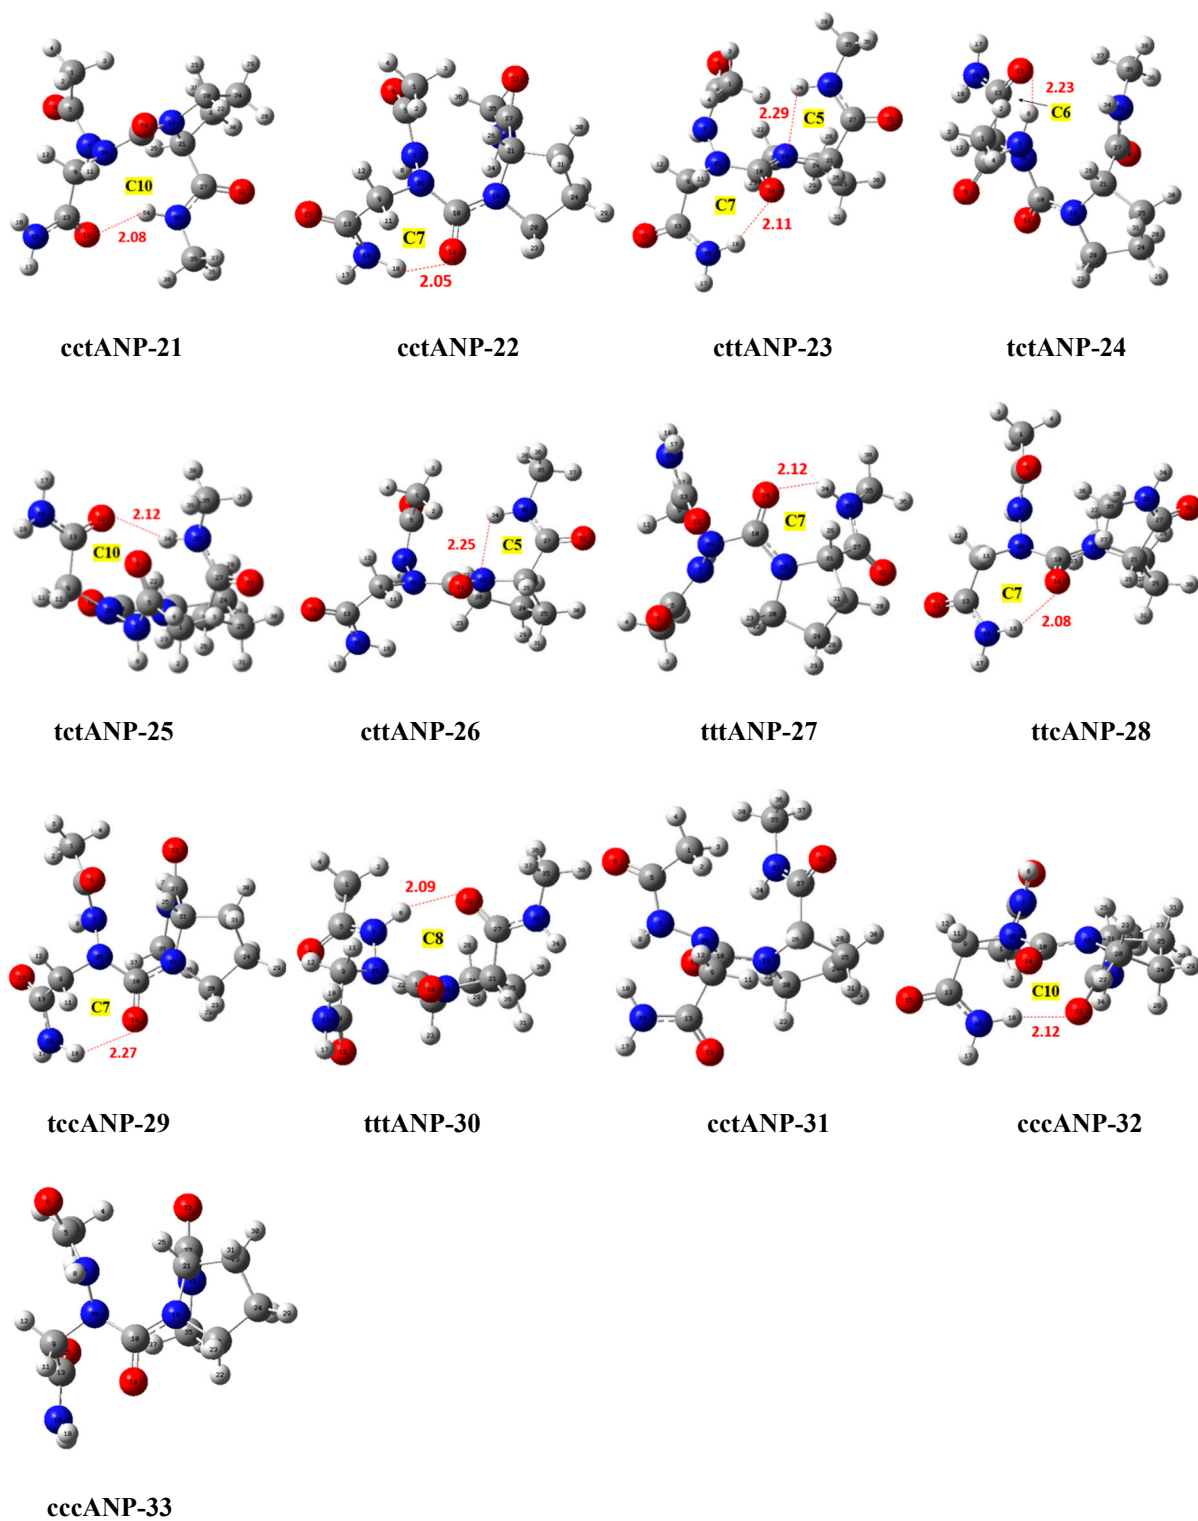

**Figure S4.** Hydrogen bonds (red dashed line) stabilizing the 33 optimized structures of Ac-azaAsn-Pro-NHMe calculated in the gas phase at the B3LYP-D<sub>3</sub>/6-311++G (d,p) level of theory.

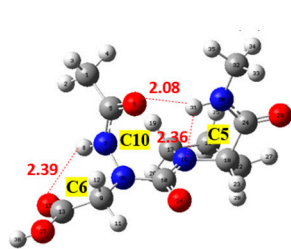

tttADP-1

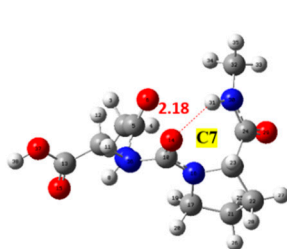

tttADP-2

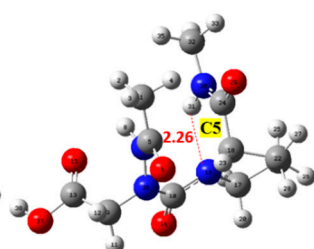

tctADP-3

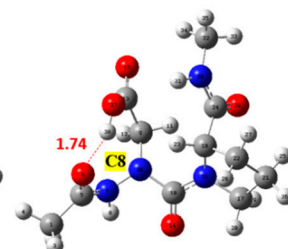

tctADP-4

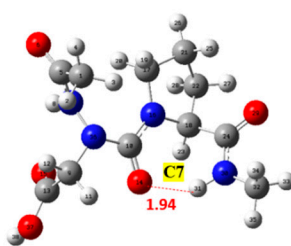

cttADP-5

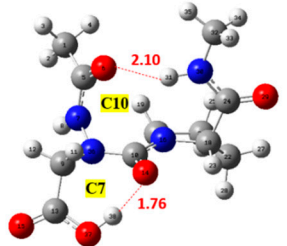

tttADP-6

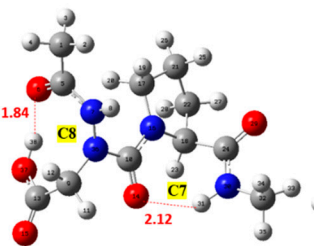

tttADP-7

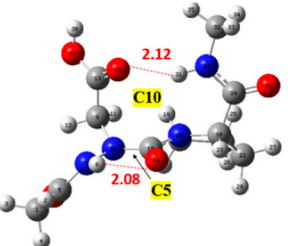

tttADP-8

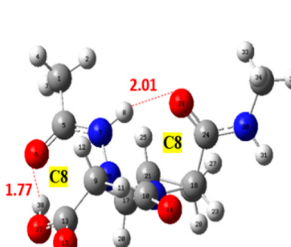

tttADP-9

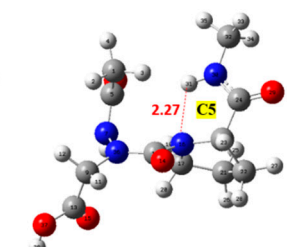

cttADP-10

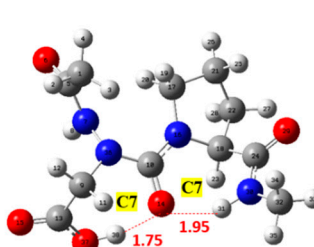

cttADP-11

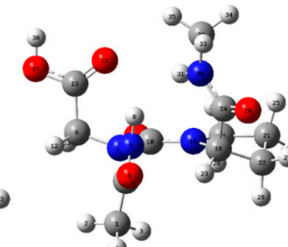

cctADP-12

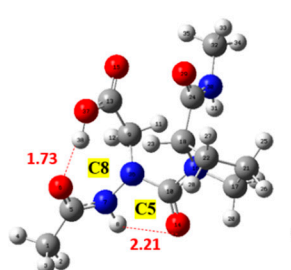

tctADP-13

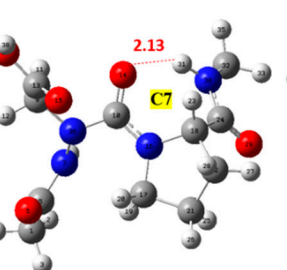

tttADP-14

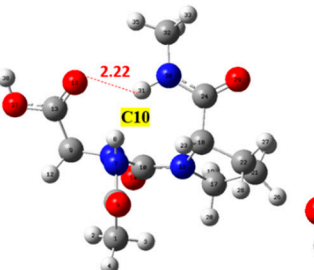

cctADP-15

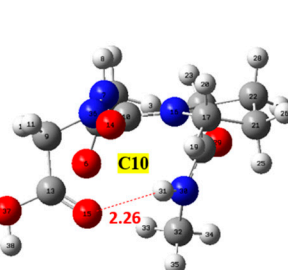

tctADP-16

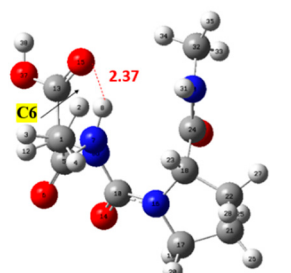

tctADP-17

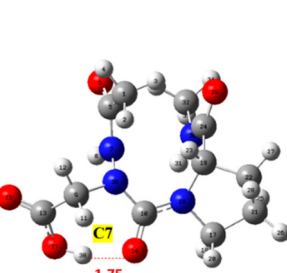

cctADP-18

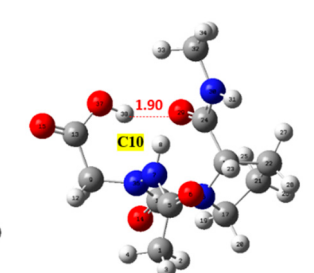

cctADP-19

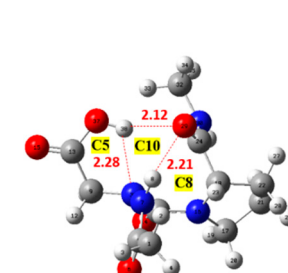

tctADP-20

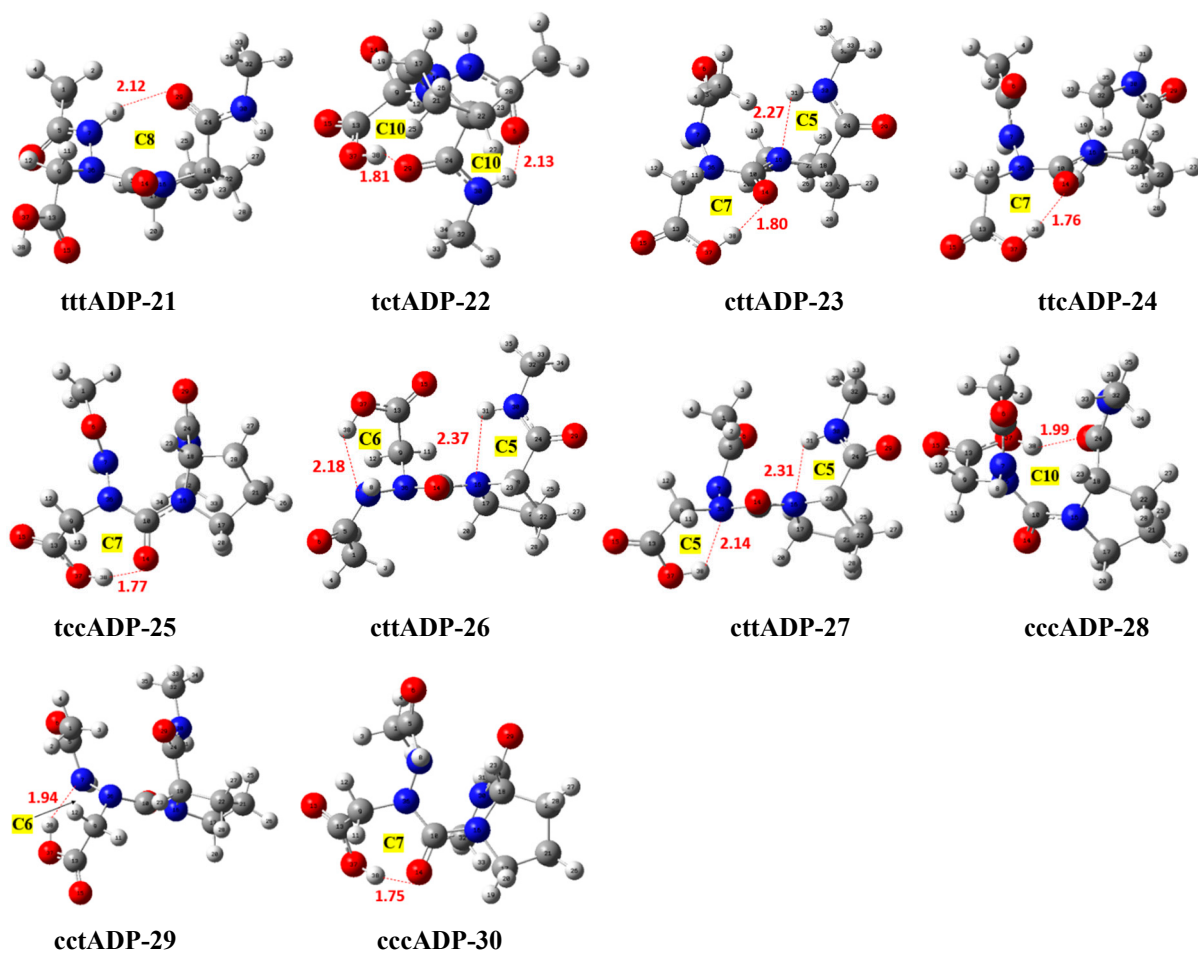

**Figure S5.** Hydrogen bonds (red dashed line) stabilizing the 30 optimized structures of Ac-azaAsp-Pro-NHMe calculated in the gas phase at B3LYP-D<sub>3</sub>/6-311++G (d,p) level of theory.



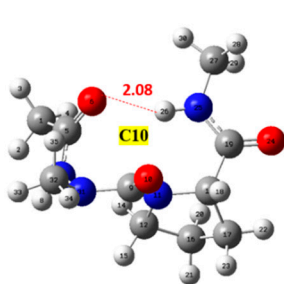

**tttAAP-1**

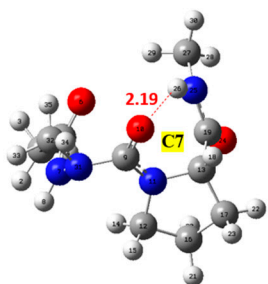

**tttAAP-2**

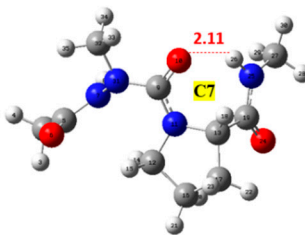

**tttAAP-3**

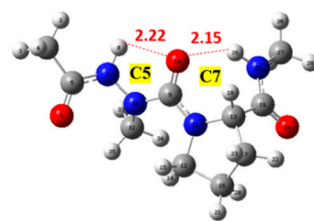

**tttAAP-4**

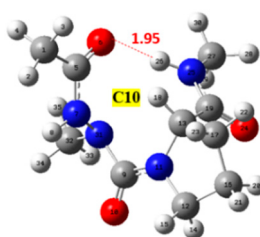

**tctAAP-5**

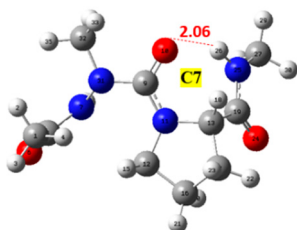

**cttAAP-6**

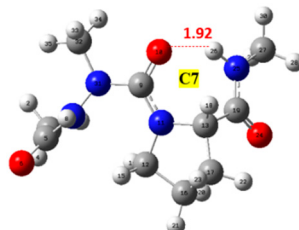

**cttAAP-7**

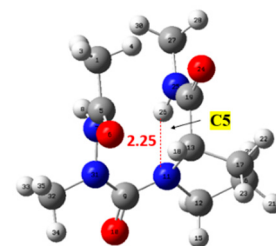

**tctAAP-8**

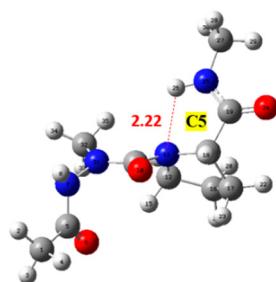

**tttAAP-9**

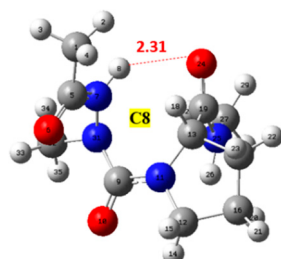

**tctAAP-10**

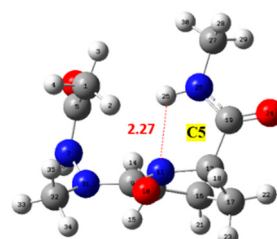

**cttAAP-11**

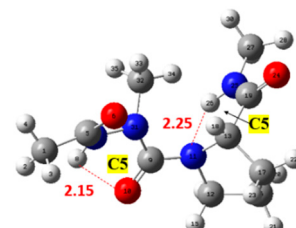

**tctAAP-12**

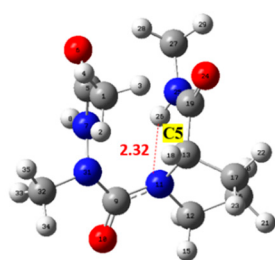

**cctAAP-13**

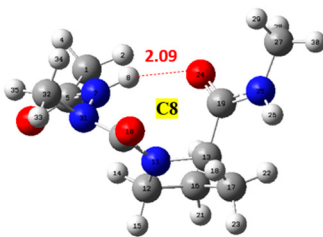

**tttAAP-14**

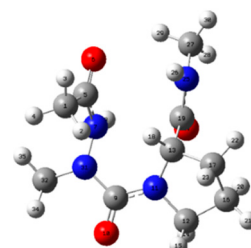

**cctAAP-15**

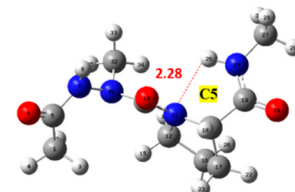

**cttAAP-16**

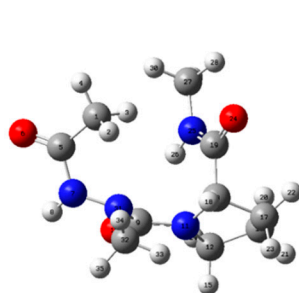

**cctAAP-17**

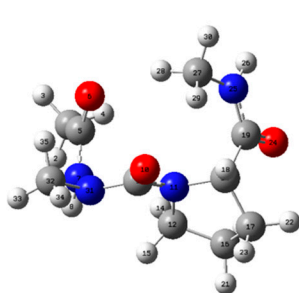

**ttcAAP-18**

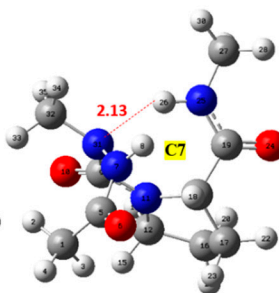

**cctAAP-19**

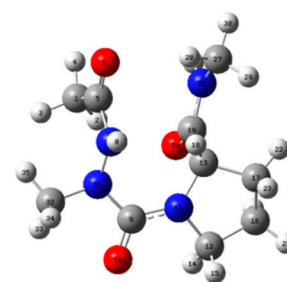

**cccAAP-20**

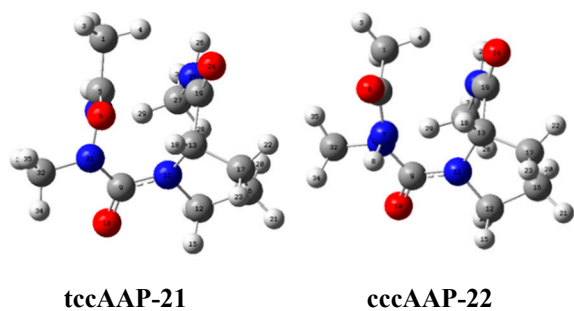

**Figure S6.** Hydrogen bonds (red dashed line) stabilizing the 22 optimized structures of Ac-azaAla-Pro-NHMe calculated in the gas phase at B3LYP-D<sub>3</sub>/6-311++G (d,p) level of theory.

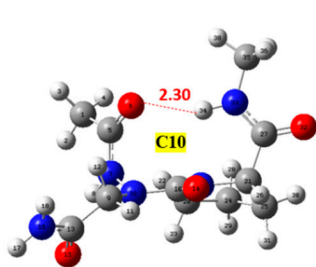

tttANP-1

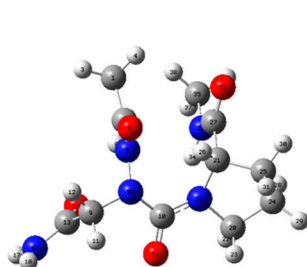

tctANP-2

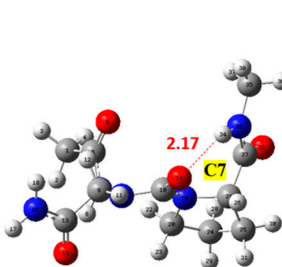

tttANP-3

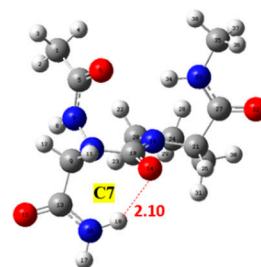

tttANP-4

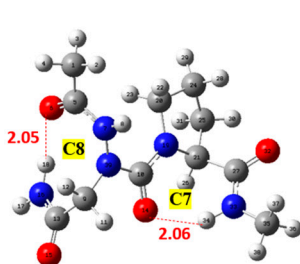

tttANP-5

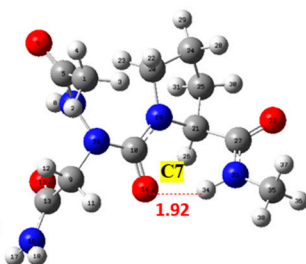

cttANP-6

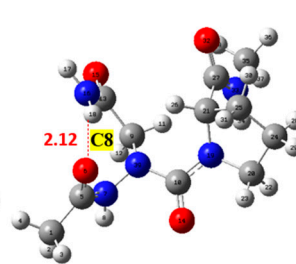

tctANP-7

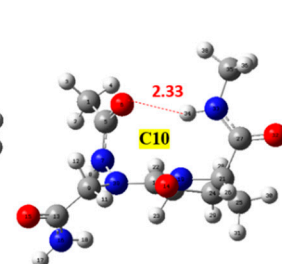

tttANP-8

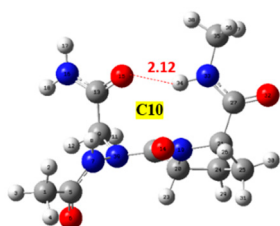

tttANP-9

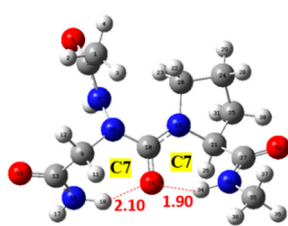

cttANP-10

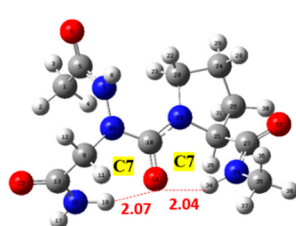

cttANP-11

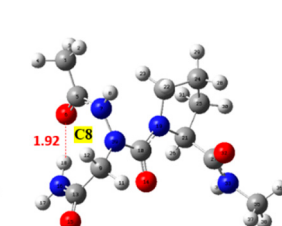

tttANP-12

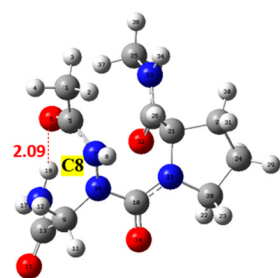

tctANP-13

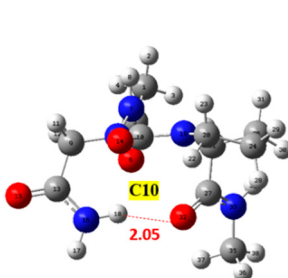

tctANP-14

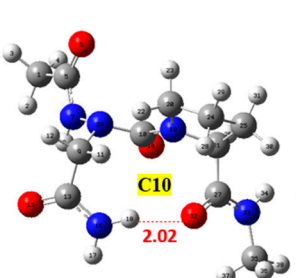

tttANP-15

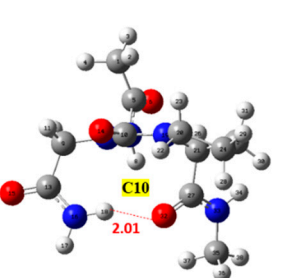

cctANP-16

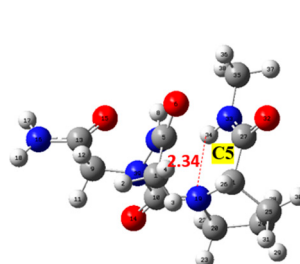

cctANP-17

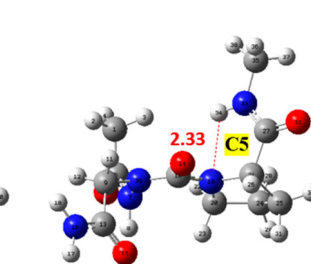

cttANP-18

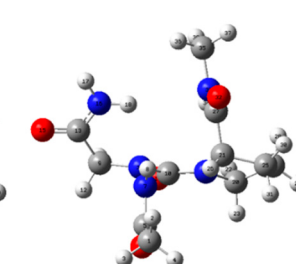

tctANP-19

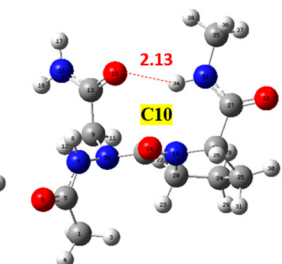

cttANP-20

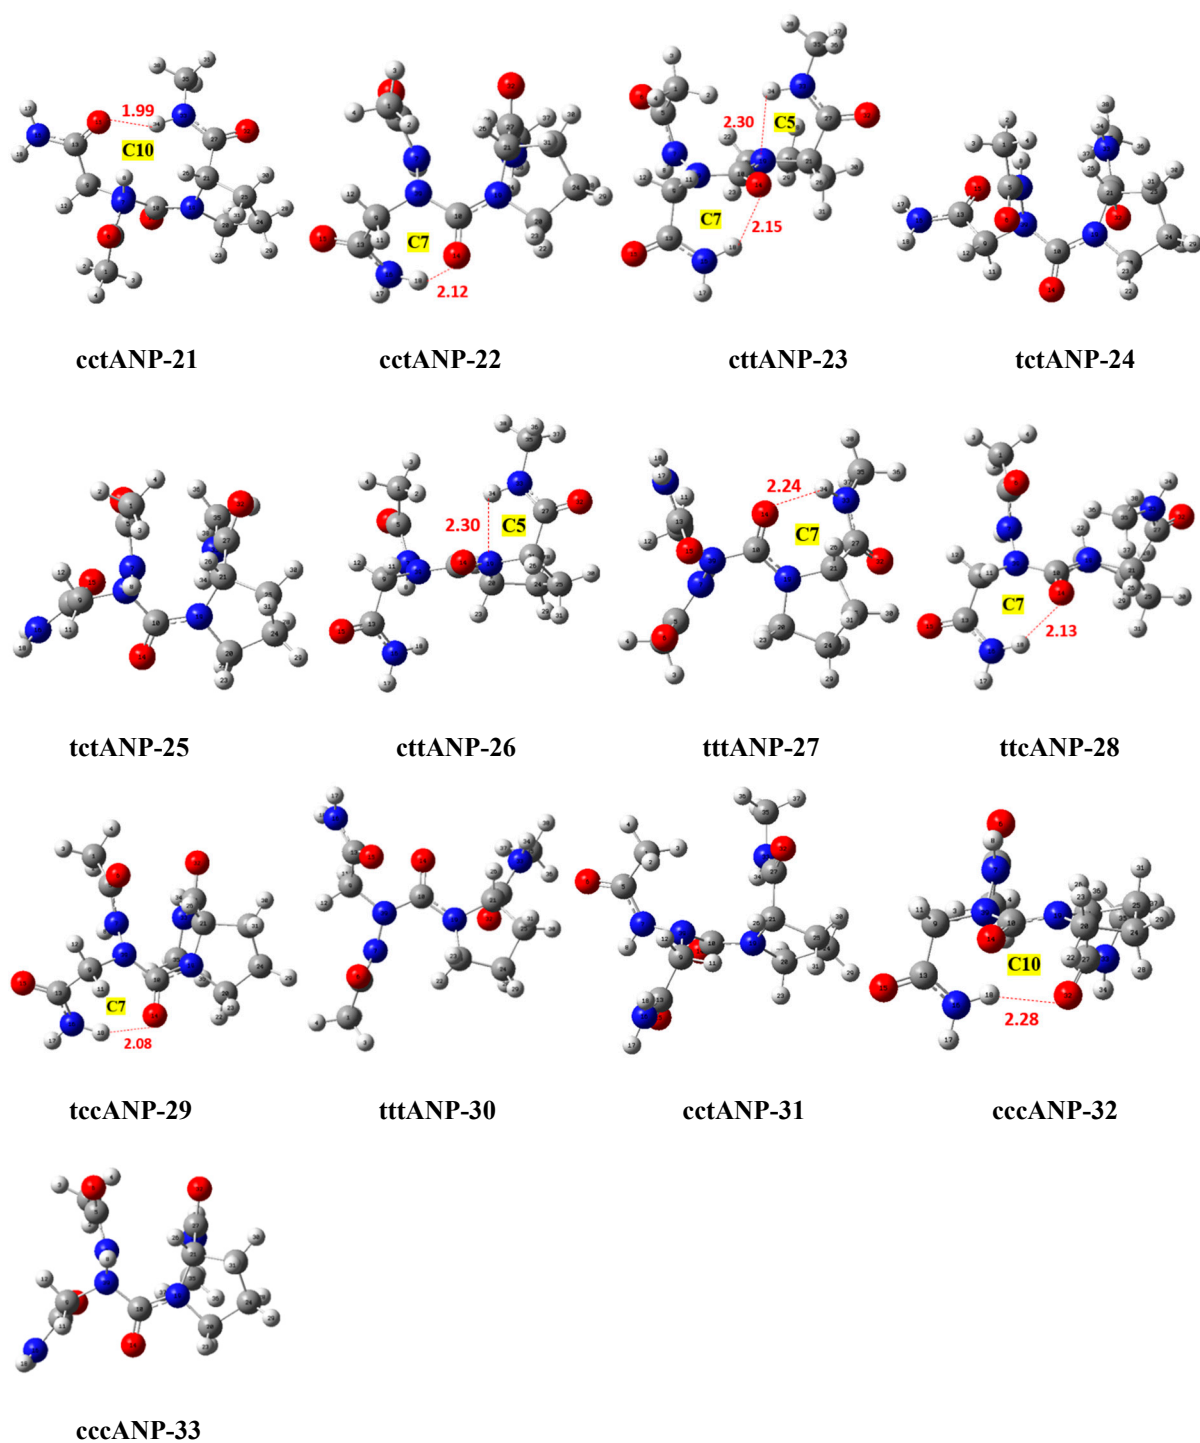

**Figure S7.** Hydrogen bonds (red dashed line) stabilizing the 33 optimized structures of Ac-azaAsn-Pro-NHMe calculated in water at the SMD/B3LYP/6-311++G (d,p) level of theory.

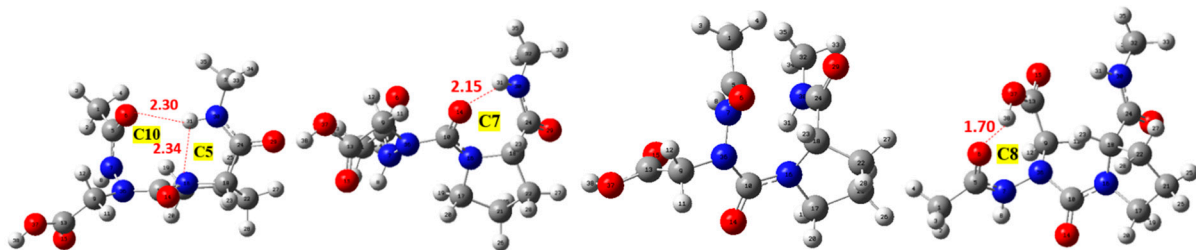

tttADP-1

tttADP-2

tctADP-3

tctADP-4

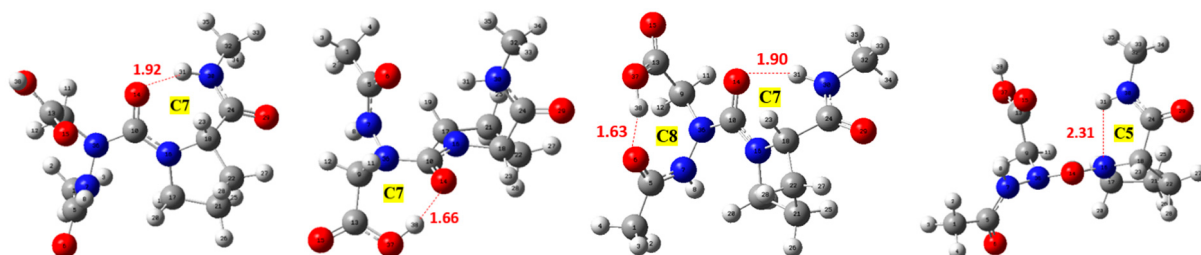

cttADP-5

tttADP-6

tttADP-7

tttADP-8

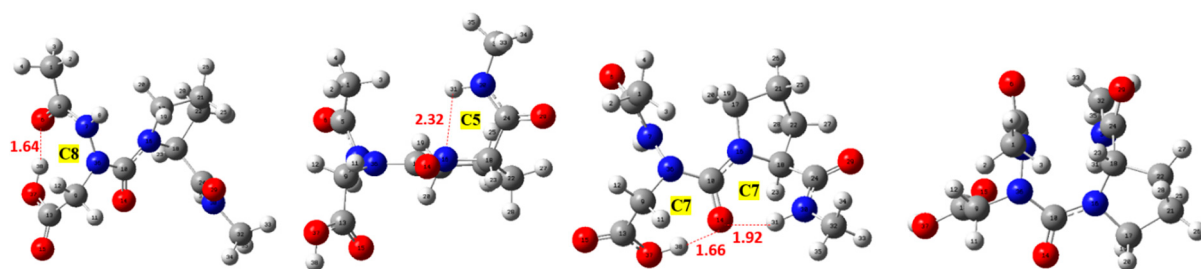

tttADP-9

cttADP-10

cttADP-11

ccADP-12

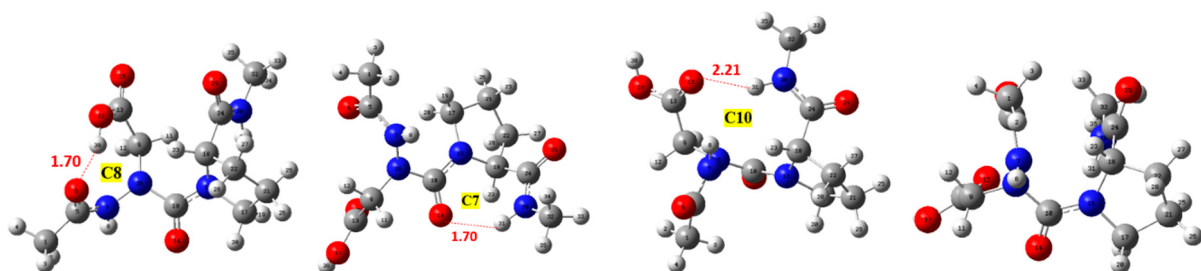

tctADP-13

tttADP-14

cctADP-15

tctADP-16

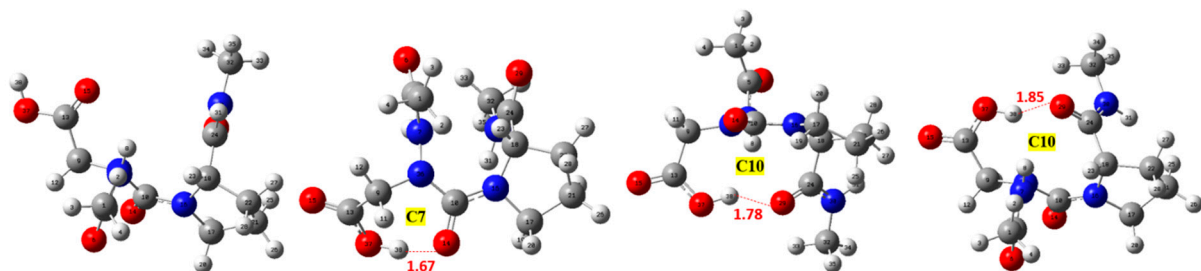

tctADP-17

cctADP-18

cctADP-19

tctADP-20



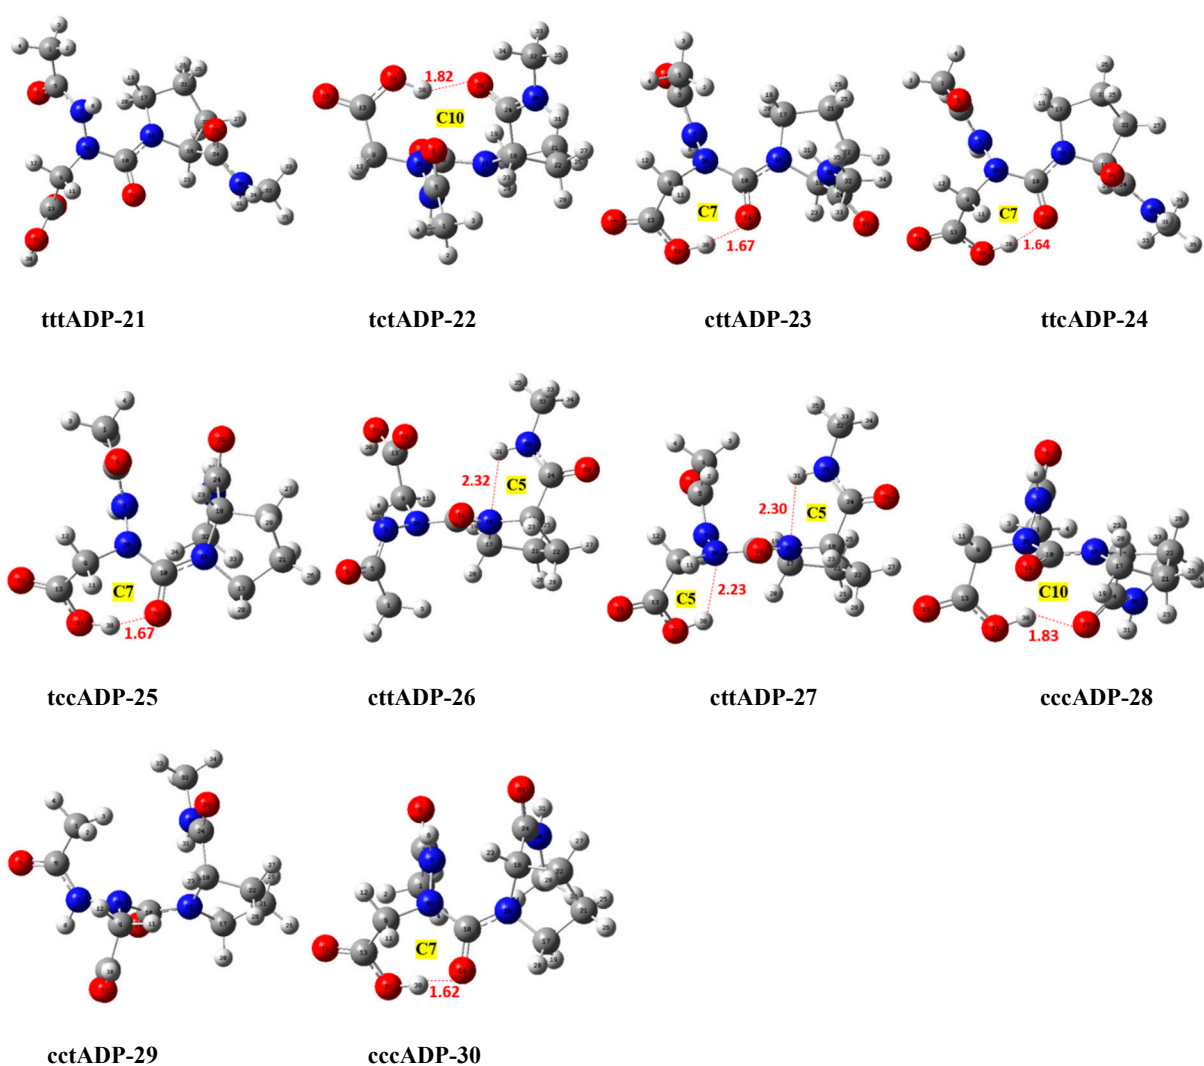

**Figure S8.** Hydrogen bonds (red dashed line) stabilizing the 30 optimized structures of Ac-azaAsp-Pro-NHMe calculated in water at the SMD/B3LYP/6-311++G (d,p) level of theory.

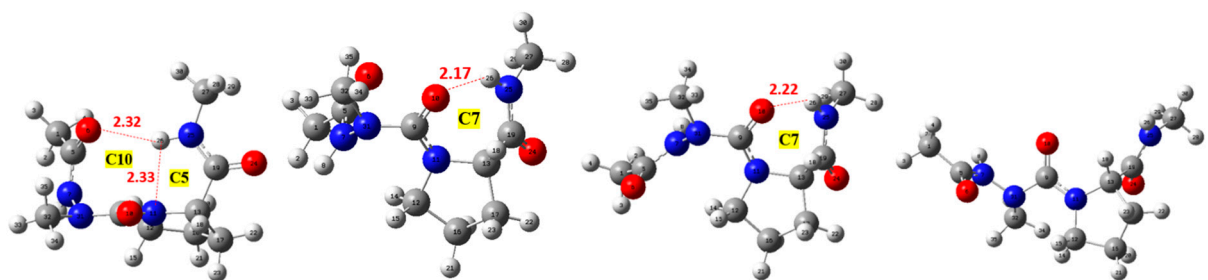

tttAAP-1

tttAAP-2

tttAAP-3

tttAAP-4

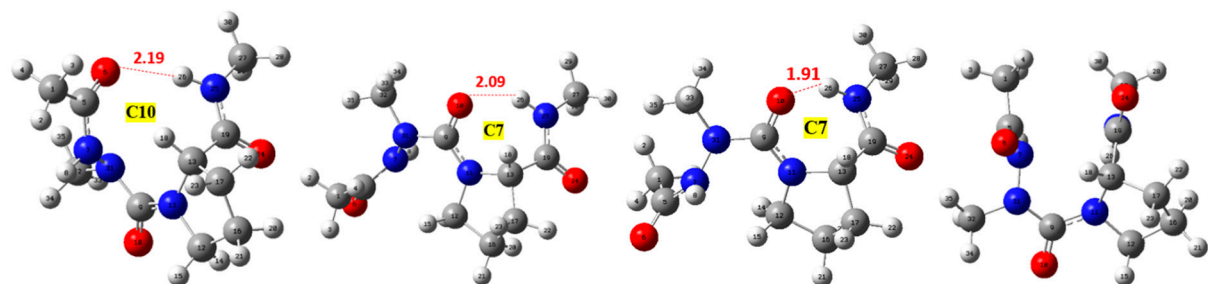

tctAAP-5

cttAAP-6

cttAAP-7

tctAAP-8

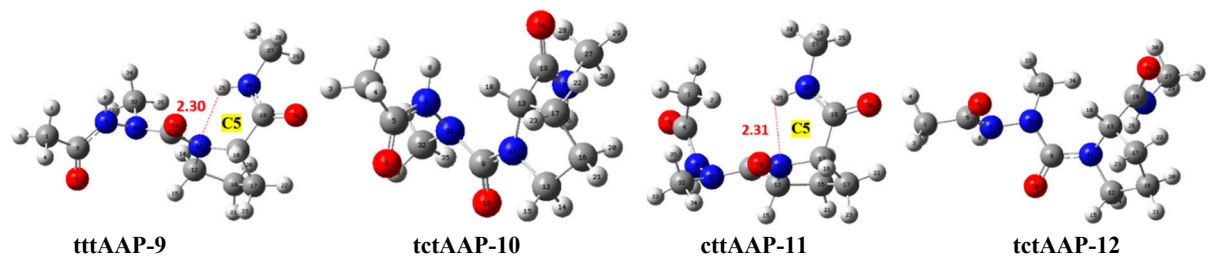

tttAAP-9

tctAAP-10

cttAAP-11

tctAAP-12

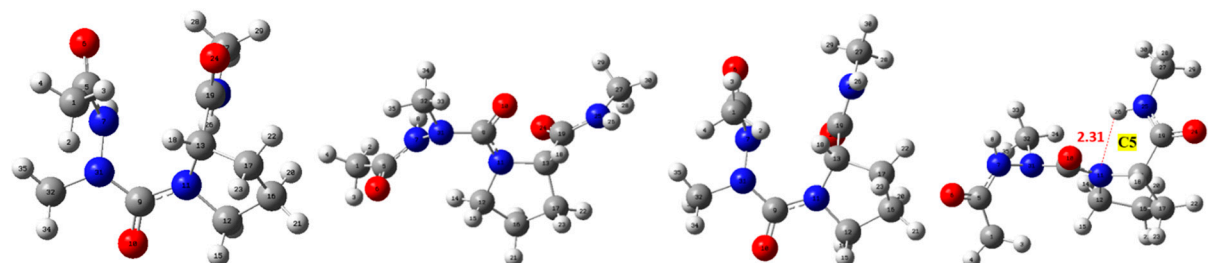

cctAAP-13

tttAAP-14

cctAAP-15

cttAAP-16

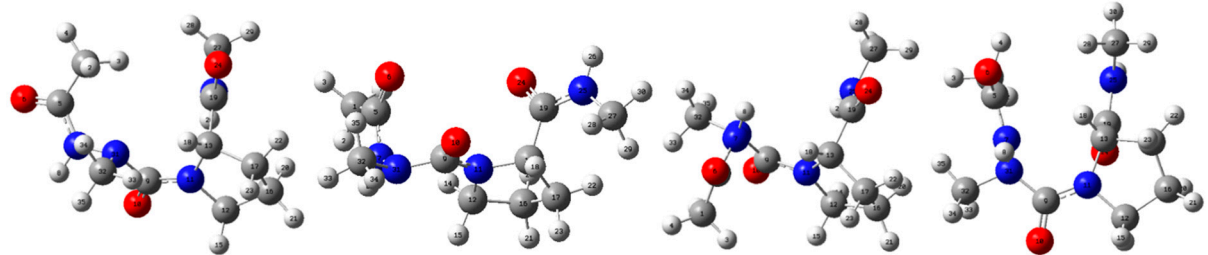

cctAAP-17

ttcAAP-18

cctAAP-19

cccAAP-20

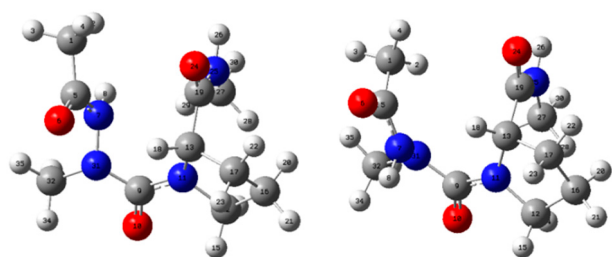

tccAAP-21

cccAAP-22

**Figure S9.** Hydrogen bonds (red dashed line) stabilizing the 22 optimized structures of Ac-azaAla-Pro-NHMe calculated in water at the SMD/B3LYP/6-311++G (d,p) level of theory.

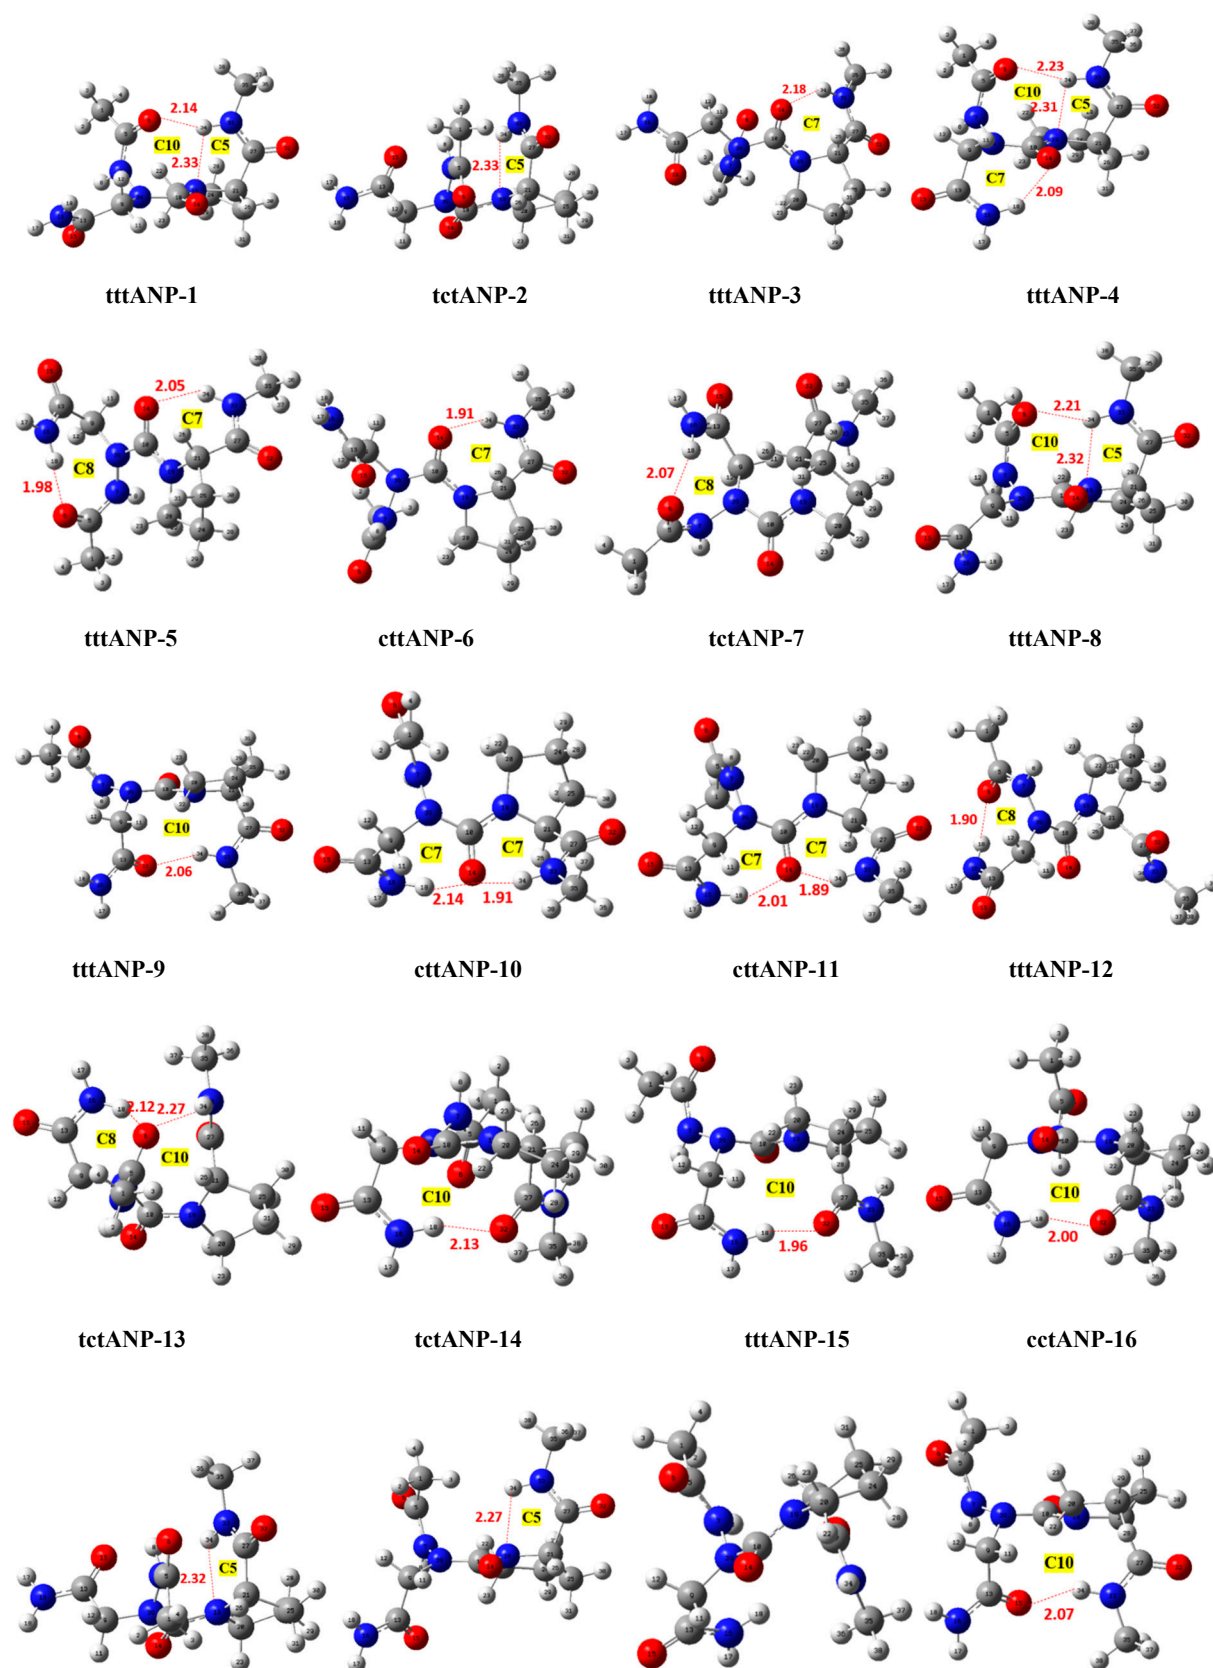



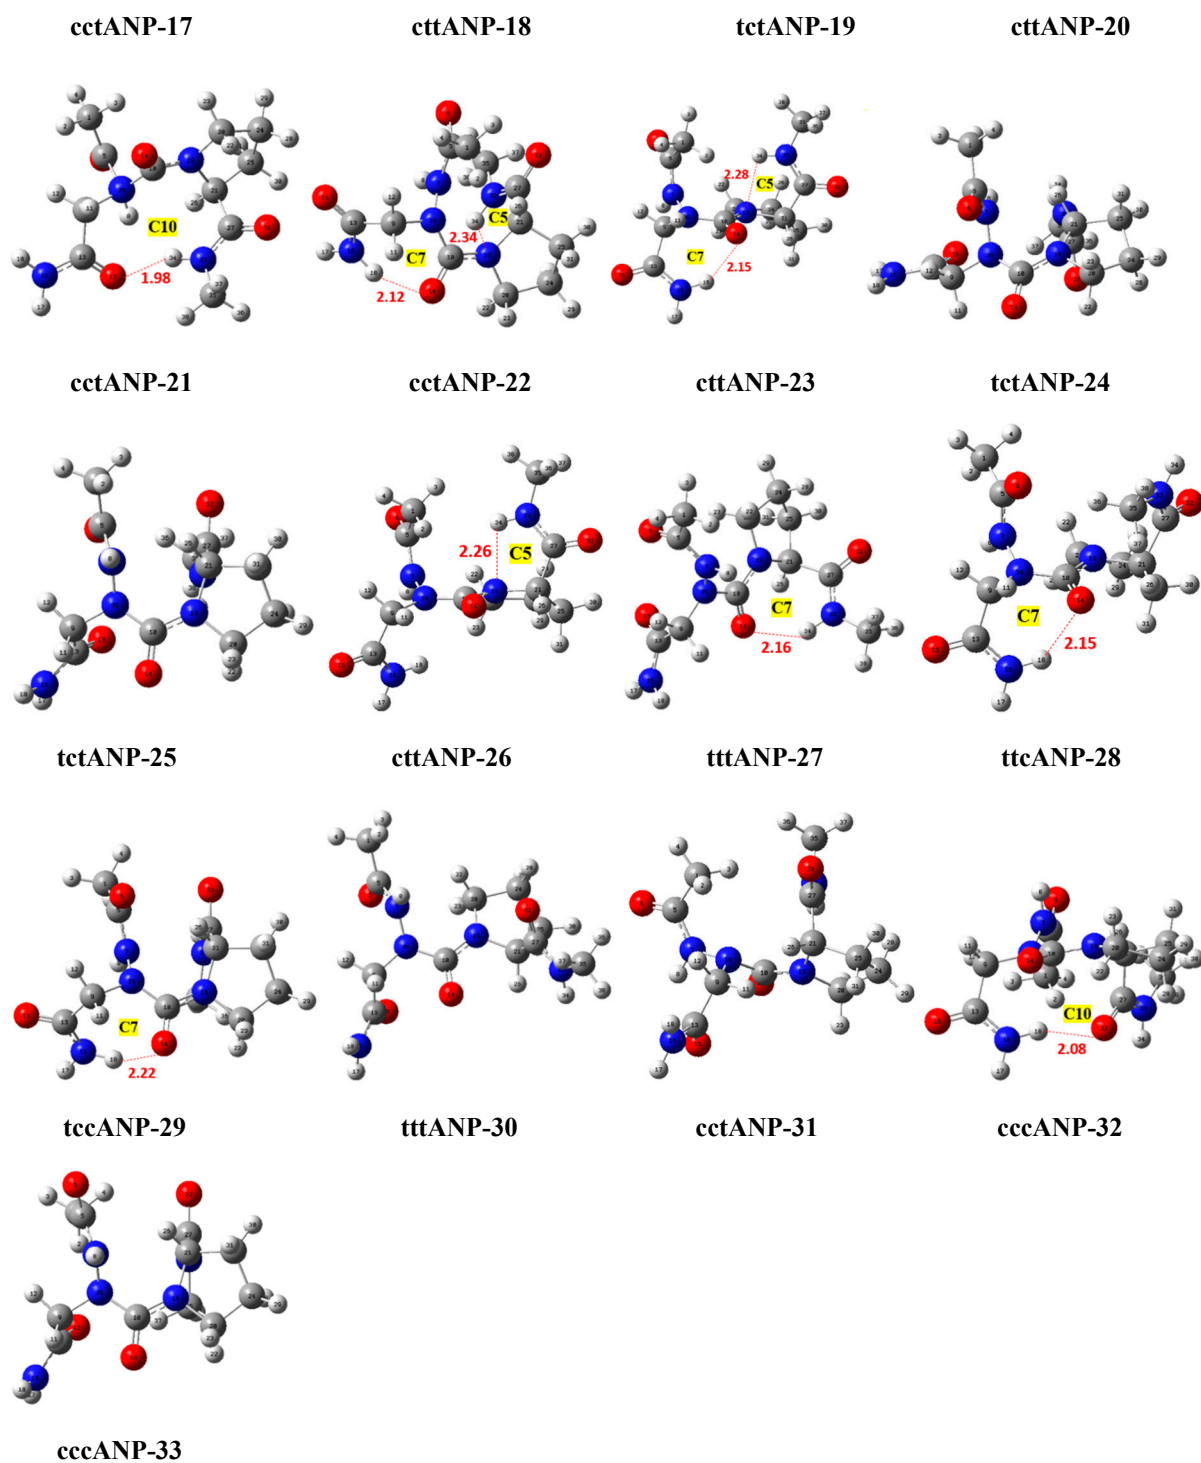

**Figure S10.** Hydrogen bonds (red dashed line) stabilizing the 33 optimized structures of Ac-azaAsn-Pro-NHMe calculated in water at the SMD/B3LYP-D<sub>3</sub>/6-311++G (d,p) level of theory.

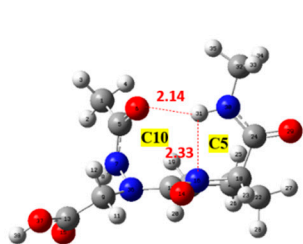

ttADP-1

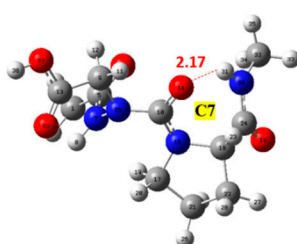

tttADP-2

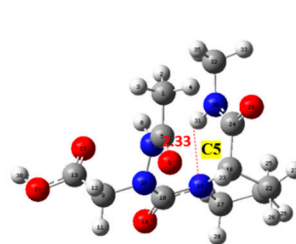

tctADP-3

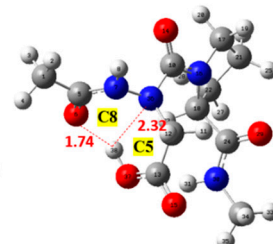

tctADP-4

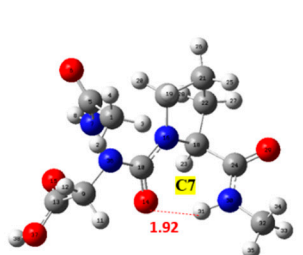

cttADP-5

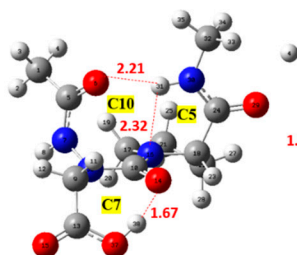

tttADP-6

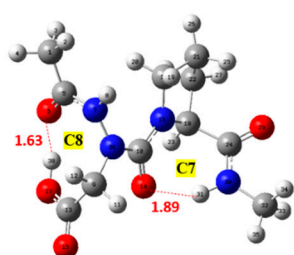

tttADP-7

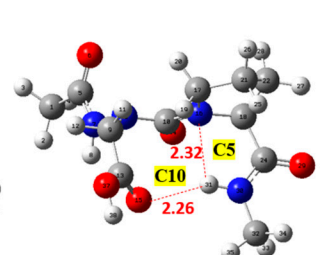

tttADP-8

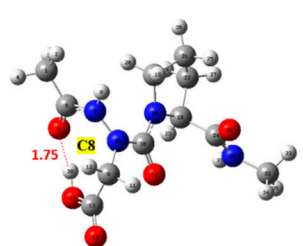

tttADP-9

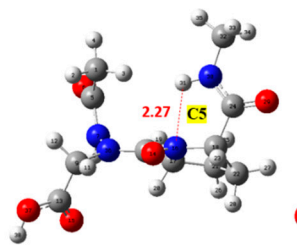

cttADP-10

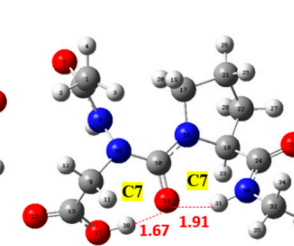

cttADP-11

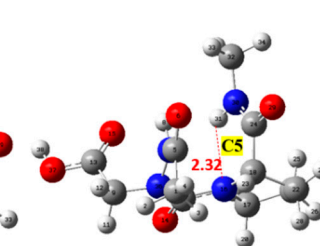

cctADP-12

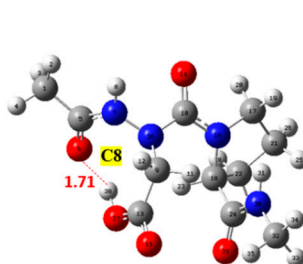

tctADP-13

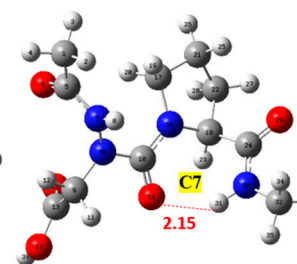

tttADP-14

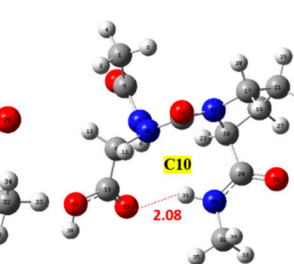

cctADP-15

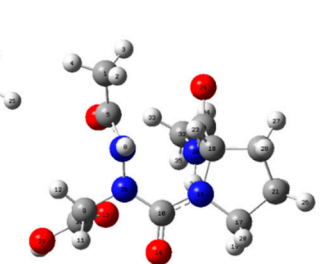

tctADP-16

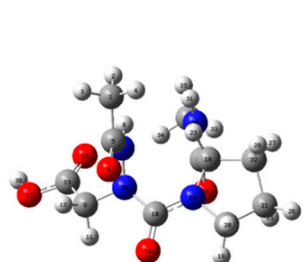

tctADP-17

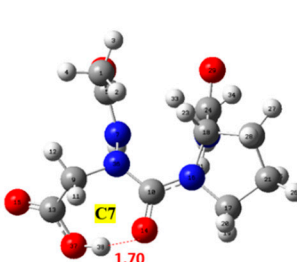

cctADP-18

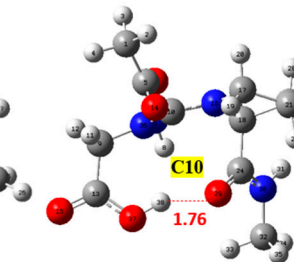

cctADP-19

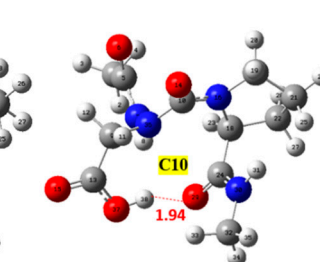

tctADP-20

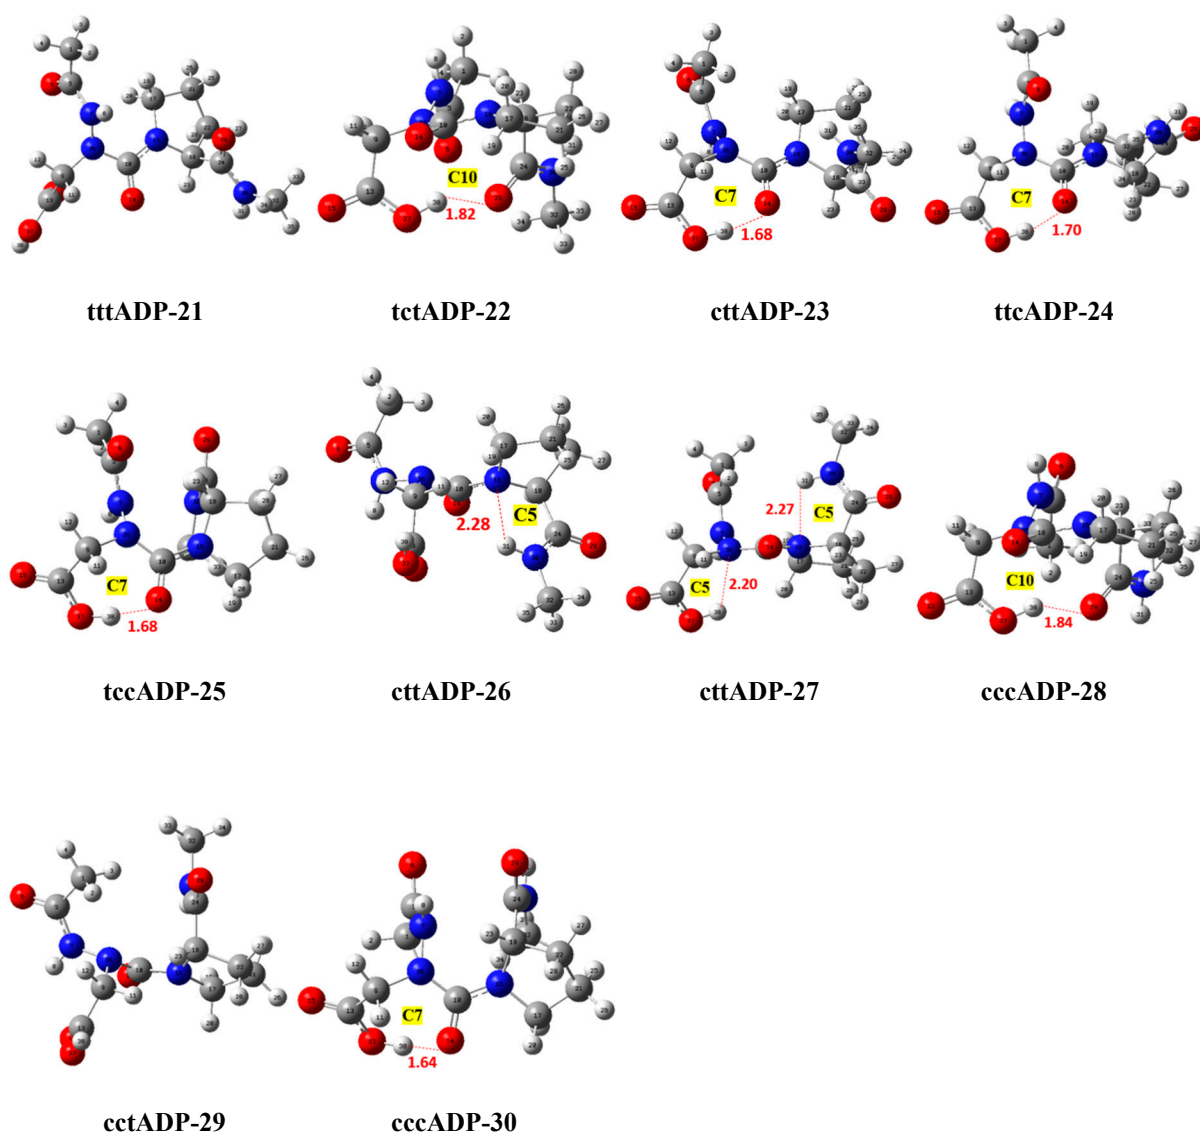

**Figure S11.** Hydrogen bonds (red dashed line) stabilizing the 30 optimized structures of Ac-azaAsp-Pro-NHMe calculated in water at the SMD/B3LYP-D<sub>3</sub>/6-311++G (d,p) level of theory.

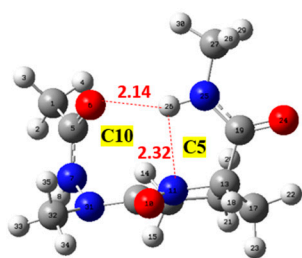

tttAAP-1

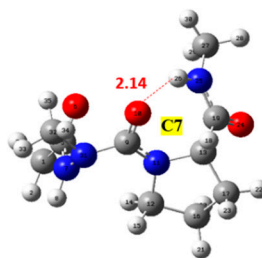

tttAAP-2

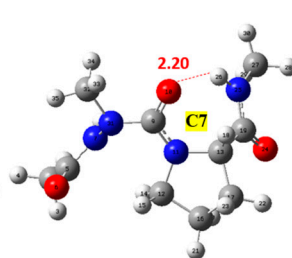

tttAAP-3

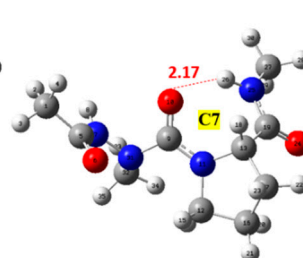

tttAAP-4

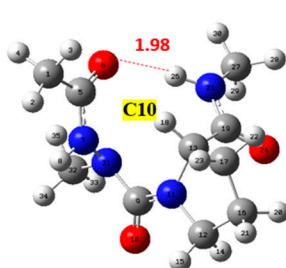

tctAAP-5

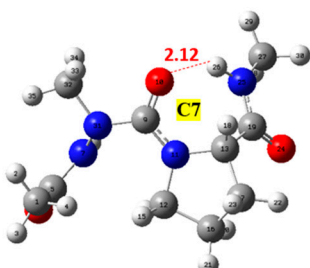

cttAAP-6

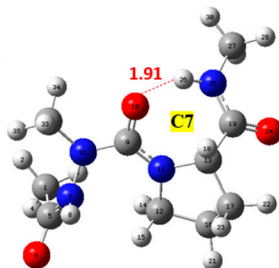

cttAAP-7

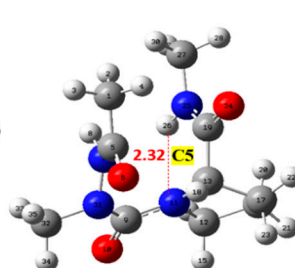

tctAAP-8

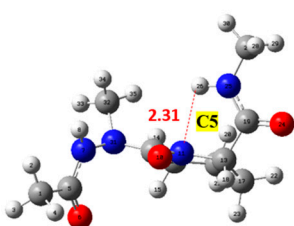

tttAAP-9

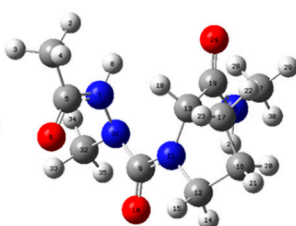

tctAAP-10

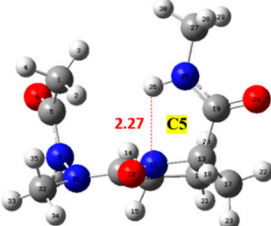

cttAAP-11

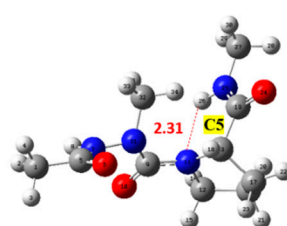

tctAAP-12

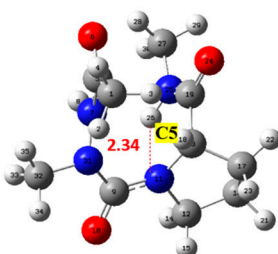

cctAAP-13

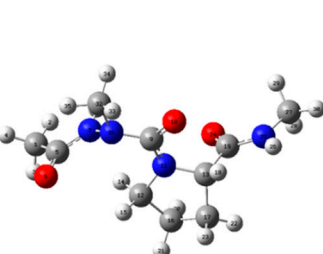

tttAAP-14

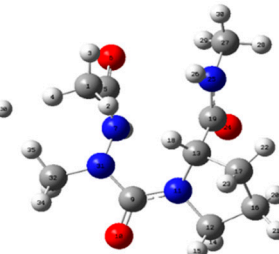

cctAAP-15

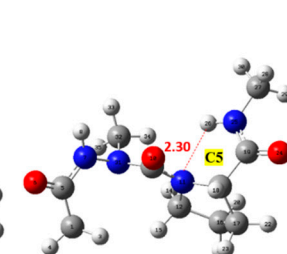

cttAAP-16

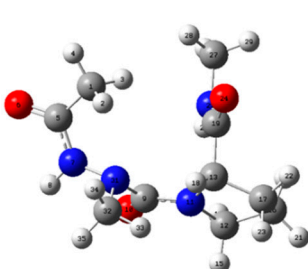

cctAAP-17

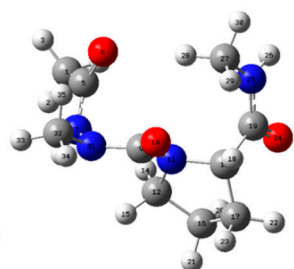

ttcAAP-18

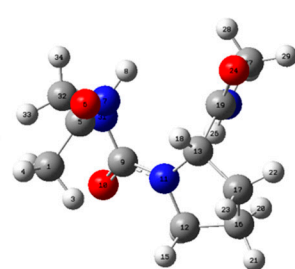

cctAAP-19

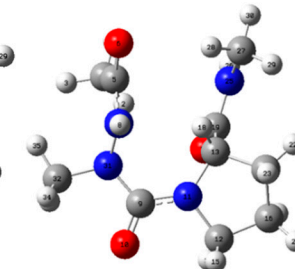

cccAAP-20

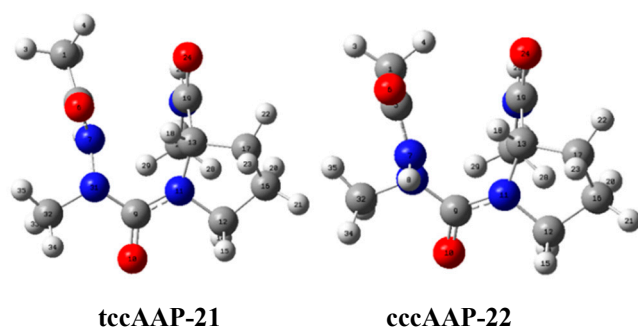

**Figure S12.** Hydrogen bonds (red dashed line) stabilizing the 22 optimized structures of Ac-azaAla-Pro-NHMe calculated in water at the SMD/B3LYP-D<sub>3</sub>/6-311++G (d,p) level of theory.

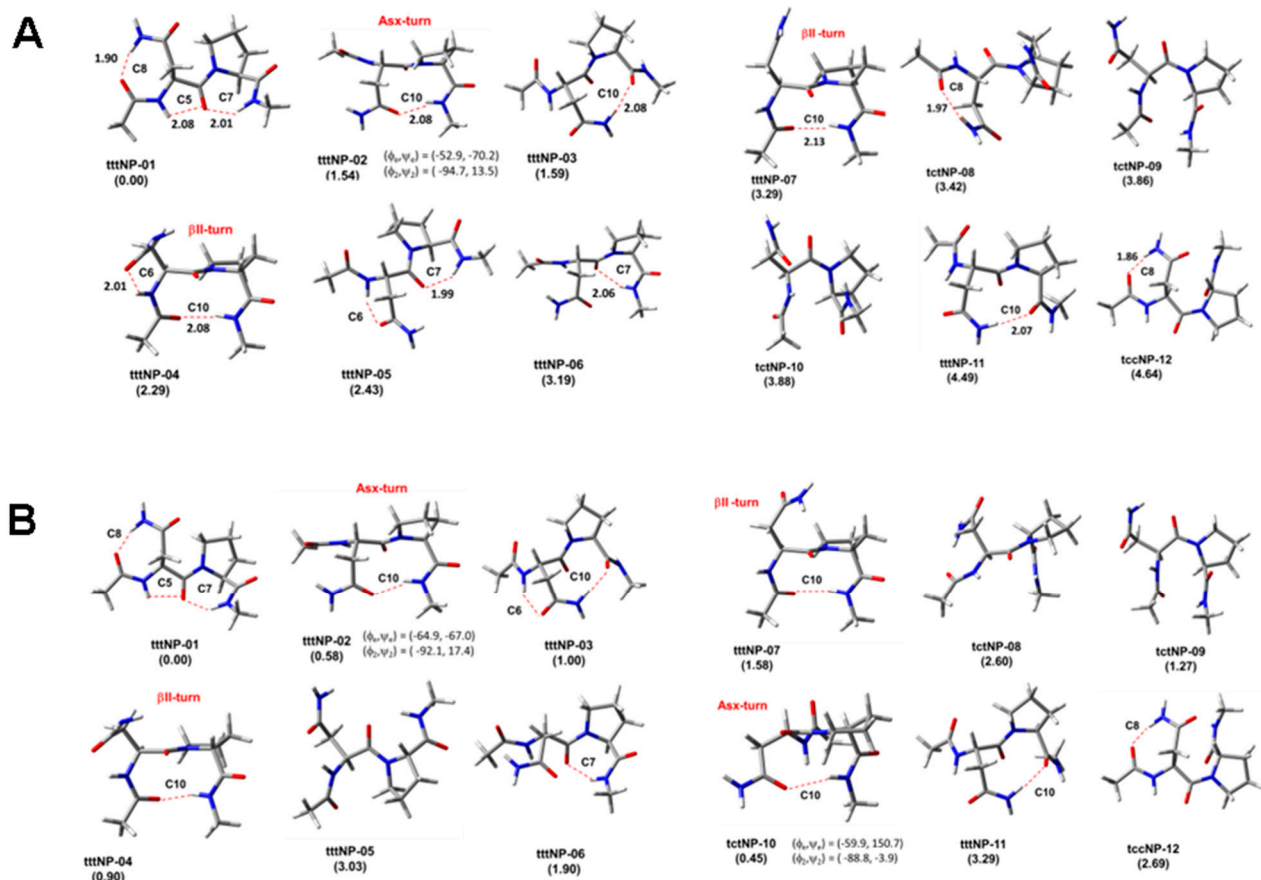

**Figure S13.** Hydrogen bonds (red dashed line) stabilizing the optimized structures of Ac-Asn-Pro-NHMe (7, NP) calculated at the B3LYP/6-311++G (d,p) (A) and B3LYP-D3/6-311++G(d,p) level of theory (B). The relative energies of the conformers are shown in parenthesis.



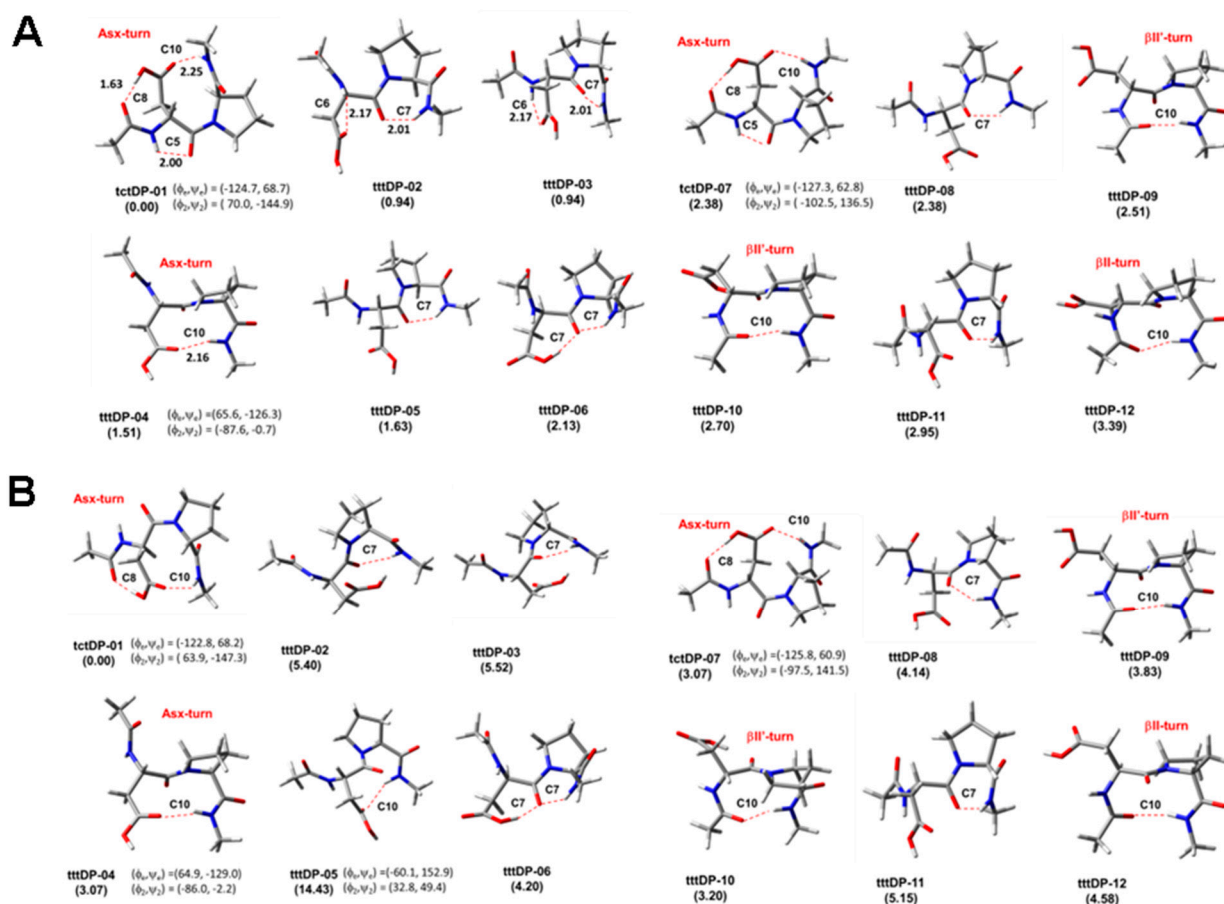

**Figure S14.** Hydrogen bonds (red dashed line) stabilizing the optimized structures of Ac-Asp-Pro-NHMe (**8**, **DP**) calculated at the B3LYP-D3/6-311++G(d,p) (**A**) and B3LYP-D3/6-311++G(d,p) (**B**) levels of theory. The relative energies of the conformers are shown in parenthesis.
